# Supplementary material for: Physicians’ attitudes towards disclosure of payments from pharmaceutical companies in a nationwide voluntary transparency database: a cross-sectional survey
Source: PubMed Central journal article supplement — BMJ Open. 2022 Jun 24;12(6):e055963. doi: 10.1136/bmjopen-2021-055963 (PMC9234799; doi:10.1136/bmjopen-2021-055963), 2022-06-24
Supplement: bmjopen-2021-055963.draft_revisions.pdf [file bmjopen-2021-055963.draft_revisions.pdf]

# BMJ Open

BMJ Open is committed to open peer review. As part of this commitment we make the peer review history of every article we publish publicly available.

When an article is published we post the peer reviewers' comments and the authors' responses online. We also post the versions of the paper that were used during peer review. These are the versions that the peer review comments apply to.

The versions of the paper that follow are the versions that were submitted during the peer review process. They are not the versions of record or the final published versions. They should not be cited or distributed as the published version of this manuscript.

BMJ Open is an open access journal and the full, final, typeset and author-corrected version of record of the manuscript is available on our site with no access controls, subscription charges or pay-per-view fees (<http://bmjopen.bmj.com>).

If you have any questions on BMJ Open's open peer review process please email [info.bmjopen@bmj.com](mailto:info.bmjopen@bmj.com)

# BMJ Open

## Physicians' attitudes towards disclosure of payments from pharmaceutical companies in a nation-wide voluntary transparency database: a cross-sectional survey

|                               |                                                                                                                                                                                                                                                                                                                                                                                                                                                                                                                                                      |
|-------------------------------|------------------------------------------------------------------------------------------------------------------------------------------------------------------------------------------------------------------------------------------------------------------------------------------------------------------------------------------------------------------------------------------------------------------------------------------------------------------------------------------------------------------------------------------------------|
| Journal:                      | <i>BMJ Open</i>                                                                                                                                                                                                                                                                                                                                                                                                                                                                                                                                      |
| Manuscript ID                 | bmjopen-2021-055963                                                                                                                                                                                                                                                                                                                                                                                                                                                                                                                                  |
| Article Type:                 | Original research                                                                                                                                                                                                                                                                                                                                                                                                                                                                                                                                    |
| Date Submitted by the Author: | 30-Jul-2021                                                                                                                                                                                                                                                                                                                                                                                                                                                                                                                                          |
| Complete List of Authors:     | Stoll, Marlene; Universitätsmedizin der Johannes Gutenberg-Universität Mainz, Department of Psychiatry and Psychotherapy; Leibniz Institute for Resilience Research<br>Hubenschmid, Lara; Leibniz Institute for Resilience Research gGmbH<br>Koch, Cora; Medical Center-University of Freiburg, Department of Neurology and Neurophysiology<br>Lieb, Klaus; Universitätsmedizin der Johannes Gutenberg-Universität Mainz, Department of Psychiatry and Psychotherapy<br>Egloff, Boris; Johannes Gutenberg University Mainz, Department of Psychology |
| Keywords:                     | Health policy < HEALTH SERVICES ADMINISTRATION & MANAGEMENT, Protocols & guidelines < HEALTH SERVICES ADMINISTRATION & MANAGEMENT, MEDICAL ETHICS                                                                                                                                                                                                                                                                                                                                                                                                    |
|                               |                                                                                                                                                                                                                                                                                                                                                                                                                                                                                                                                                      |

SCHOLARONE™  
Manuscripts

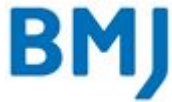

I, the Submitting Author has the right to grant and does grant on behalf of all authors of the Work (as defined in the below author licence), an exclusive licence and/or a non-exclusive licence for contributions from authors who are: i) UK Crown employees; ii) where BMJ has agreed a CC-BY licence shall apply, and/or iii) in accordance with the terms applicable for US Federal Government officers or employees acting as part of their official duties; on a worldwide, perpetual, irrevocable, royalty-free basis to BMJ Publishing Group Ltd ("BMJ") its licensees and where the relevant Journal is co-owned by BMJ to the co-owners of the Journal, to publish the Work in this journal and any other BMJ products and to exploit all rights, as set out in our [licence](#).

The Submitting Author accepts and understands that any supply made under these terms is made by BMJ to the Submitting Author unless you are acting as an employee on behalf of your employer or a postgraduate student of an affiliated institution which is paying any applicable article publishing charge ("APC") for Open Access articles. Where the Submitting Author wishes to make the Work available on an Open Access basis (and intends to pay the relevant APC), the terms of reuse of such Open Access shall be governed by a Creative Commons licence – details of these licences and which [Creative Commons](#) licence will apply to this Work are set out in our licence referred to above.

Other than as permitted in any relevant BMJ Author's Self Archiving Policies, I confirm this Work has not been accepted for publication elsewhere, is not being considered for publication elsewhere and does not duplicate material already published. I confirm all authors consent to publication of this Work and authorise the granting of this licence.

1  
2  
3 **Physicians' attitudes towards disclosure of payments from pharmaceutical**  
4 **companies in a nation-wide voluntary transparency database: a cross-sectional**  
5 **survey**  
6  
7  
8  
9

10 Marlene Stoll\*, Lara Hubenschmid, Cora Koch, Klaus Lieb, Boris Egloff  
11  
12  
13

14 Marlene Stoll (marlene.stoll@unimedizin-mainz.de)

15 Department of Psychiatry and Psychotherapy, University Medical Center Mainz, Untere Zahlbacher Straße 8,  
16 55131 Mainz, Germany

17 Leibniz Institute for Resilience Research (LIR) gGmbH, Mainz, Germany

18 <http://orcid.org/0000-0001-8847-5497>  
19  
20  
21

22 Lara Hubenschmid (lara.hubenschmid@lir-mainz.de)

23 Leibniz Institute for Resilience Research (LIR) gGmbH, Mainz, Germany  
24  
25

26 Cora Koch (cora.koch@uniklinik-freiburg.de)

27 Department of Neurology and Neurophysiology, Medical Center - University of Freiburg, Freiburg, Germany

28 <http://orcid.org/0000-0003-0827-7023>  
29  
30  
31

32 Klaus Lieb (klaus.lieb@lir-mainz.de)

33 Department of Psychiatry and Psychotherapy, University Medical Center Mainz, Mainz, Germany

34 Leibniz Institute for Resilience Research (LIR) gGmbH, Mainz, Germany  
35  
36

37 Boris Egloff (egloff@uni-mainz.de)

38 <https://orcid.org/0000-0002-5736-9912>

39 Department of Psychology, Johannes Gutenberg University Mainz  
40  
41  
42

43 \* Corresponding author  
44  
45  
46

47 Word count: 3996  
48  
49  
50  
51  
52  
53  
54  
55  
56  
57  
58  
59  
60

## ABSTRACT

**Objectives:** To investigate German physicians' attitudes towards and experiences with voluntary disclosure of payments by pharmaceutical companies in a public database and their impact on future decisions for or against disclosure.

**Design:** National cross-sectional survey conducted in 2018 among physicians who voluntarily disclosed at least one payment in the German transparency regulation.

**Setting:** Retrospective paper-pencil questionnaire about attitudes towards and experiences with voluntary payment disclosures in the first (2015) and second year (2016) of the German transparency regulation.

**Participants:** German physicians who disclosed either in the first year only, the second year only, or in both years of the transparency regulation.

**Primary outcomes:** (1) the probability to disclose in 2016, predicted by physicians' experience of reactions from others in 2015, descriptive norms, and attitudes towards transparency; (2) frequency and (3) content of reactions from others 2015 compared to 2016.

**Results:** Data of 234 respondents were analysed ( $n = 42, 45, \text{ and } 147$  physicians who disclosed in 2015, 2016 or both years, respectively). The probability to disclose in 2016 was not predicted by perceived reactions, norms, or attitudes towards transparency ( $p > .01$ ). Most participants reported not to have received any reactions by patients (190/234, 81%), colleagues (128/234, 55%) or the private environment (153/234, 65%). Neither frequency nor content of reactions differed between the first and second year (scale 1-5; frequency:  $Mdn_{2015,2016} = 1.33$  vs.  $1.36$ ,  $r_b = -.17$ ,  $p > .01$ ; content:  $Mdn_{2015,2016} = 2.69$  vs.  $2.96$ ,  $r_b = .19$ ,  $p > .01$ ). However, media reporting, fear of reputational damage and a feeling of being defamed were mentioned as reasons for non-disclosure.

**Conclusions:** While confirmatory analyses did not provide significant results, descriptive analyses showed that participants who voluntarily disclose payments mainly do not experience any reactions towards their disclosures but report fears about losing their reputation due to disclosures.

**Registration:** <https://osf.io/ztvur>

## ARTICLE SUMMARY

### Strengths and limitations of this study

- This study is the first survey of attitudes and experiences of physicians who voluntarily disclosed payments by pharmaceutical companies in a nation-wide transparency database.
- The sample takes into account whether physicians disclosed only in one year or in two consecutive years.
- The study was preregistered and provides qualitative and quantitative data on reasons for non-disclosure in this database.
- The questionnaire used in this study was only constructed for this purpose, so a direct comparison with other data is not possible.

## INTRODUCTION

The medical care-giving sector has long been interconnected with the pharmaceutical industry. One patient-oriented, the other competition-driven, this constellation has brought along observations of systematic biases in research and daily care.[1–3] Situations in which a secondary interest such as financial gain creates a risk that a primary interest such as patient welfare is unduly influenced are defined as conflicts of interest (COI).[4,5] Several approaches have been established as an answer to the challenge of COI in medicine, amongst which transparency regulations have been very popular in the latest years.[6–8]

This study explores the effects of the European transparency regulation of payments by pharmaceutical companies to healthcare professionals (HCPs) in Germany. Transparency regulations have been introduced to “shed light” on formerly unknown information,[9] in this case: information about payments from pharmaceutical companies to HCPs. In the United States, such payments are fully transparent since the introduction of the Physician Payments Sunshine Act (PPSA). Payments are publicly disclosed on the Open Payments website.[10] Metaphorically speaking, the transatlantic sun shines brightly on the financial interactions between industry and HCPs. In Europe, sunlight is partly concealed, since transparency is mandatory only in some European countries whereas in countries such as Germany, pharmaceutical companies only fragmentarily disclose payments.[6,8,11] In Germany, transparency of payments to HCPs is regulated primarily by self-regulation of the pharmaceutical industry. Because of data protection laws, the HCP’s consent is needed for the respective financial interaction to be disclosed on each company’s website.[11,12]

The disclosure of financial COI can have unintended effects (e.g., loss of patient trust [13,14]). While research has been done on the experiences of U.S. physicians with the PPSA,[15] there is a lack of research on experiences with industry-driven transparency regulations such as the European approach.

### Physicians’ experiences with transparency guidelines

In focus groups conducted in the United States in 2015,[15] physicians reported they did not know much about the PPSA and had only limited experience with the Open Payments website. They expressed a positive attitude towards the general concept of transparency, but also reported negative experiences with the regulation such as administrative burden. They felt treated unfairly and were worried the disclosures might mislead patients.[15] A similar attitude was reported towards the German voluntary

1  
2  
3 transparency regulation in a newspaper article.[16] In this report about physicians who  
4 explicitly decided against disclosure in the German transparency database, the interviewees  
5 stated to approve transparency in general, but also said the current regulation was unfair,  
6 that the disclosed information was misleading, and that patients' trust would suffer.[16]  
7  
8 However, a systematic survey on that topic has not been conducted yet.  
9  
10

## 11 12 **Effects of recipients' attention to transparency databases on physicians**

13  
14 One aim of COI disclosure is that it could motivate conflicted persons to change their  
15 behaviour for the better.[17] Physicians who must disclose payments might feel ashamed or  
16 like they are standing in the spotlight.[15] This may lead the disclosing physicians to a  
17 behavioural adjustment: They might subsequently avoid COIs so that they do not have to  
18 disclose them and do not feel ashamed about them anymore. This effect, however, might  
19 cease if disclosers realize that the public is not aware of the disclosed information.[17]  
20 According to two surveys of U.S. citizens in 2014 and 2015, public salience of the Open  
21 Payments website is low: Only 9-12 % knew about the disclosed information.[18,19] While  
22 the interviewed U.S. physicians believed that patients were uninterested in the data,[15] the  
23 unsystematically interviewed German physicians feared that patients would be misled by the  
24 disclosed data and draw false conclusions, which is why they decided against disclosure in  
25 the German database.[16]  
26  
27  
28  
29  
30  
31  
32  
33

34 Conflicted physicians who believe that patients are aware of disclosed information  
35 may behave differently as compared to physicians who believe that no one pays attention. It  
36 might therefore be important whether physicians notice people reacting to the COI  
37 disclosure, since this could function as an indication that recipients are aware of the  
38 disclosed COI. Whether reactions are negative or positive may further indicate how people  
39 interpret the disclosed information. Such reactions could affect physicians' handling of COI in  
40 the future and their willingness to disclose industry payments in a public database. This  
41 study, therefore, investigates the reactions to voluntarily disclosed COI that German  
42 physicians experienced and whether these reactions impact future disclosure behaviour.  
43  
44  
45  
46  
47  
48  
49

## 50 **Norms**

51  
52 In case of voluntary transparency regulations, the number of cooperating HCPs who  
53 disclose COI could be important for the commitment of all HCPs, since it may indicate that  
54 COI disclosure is seen as "normal". The descriptive norm (i.e., the perceived prevalence of  
55 behaviour) might be decisive for HCPs' decision whether to disclose COI. Since social  
56 norms are indications for behaviour that is accepted by a group,[20,21] the first time that  
57 area-wide information about the frequency of behaviour becomes available may be critical  
58  
59  
60



1  
2  
3 for the establishment of new norms. Implementing a nation-wide transparency guideline  
4 implies a first time when new information is disclosed to the public. From this point on,  
5 information is available about how many HCPs disclose payments and how much money  
6 they disclose. Such information could form a new reference frame for what is seen as  
7 “normal” behaviour.  
8  
9  
10

11 This first time when information is disclosed is also a critical moment because the  
12 disclosed information is new to the public, meaning that it may not yet be perceived as  
13 “normal” but as scandalous. In the first year of a voluntary transparency regulation, the  
14 media and the public may pay considerable attention to the disclosures, directing the  
15 spotlight on those who decided to disclose. Recipients may show more extreme reactions  
16 towards a disclosing physician in the first year of a transparency database than in the  
17 following years. By rewarding or punishing the behaviour, recipients may thus reinforce the  
18 social norm to disclose. Relevant recipients for information about physicians’ payments by  
19 pharmaceutical companies are their patients, colleagues, and persons in their private  
20 environment.  
21  
22  
23  
24  
25  
26  
27

28 This study, therefore, also investigates how physicians’ descriptive norm to disclose  
29 (i.e., the estimated prevalence of transparency cooperativeness) predicts future disclosure  
30 behaviour; and whether reactions by recipients differed between the first and the second  
31 year of the transparency regulation.  
32  
33  
34  
35

### 36 **Germany’s transparency regulation**

37  
38 In Germany, pharmaceutical companies organized in the “association of voluntary  
39 self-regulation in the pharmaceutical industry” passed a self-regulation transparency codex  
40 requiring German HCPs to give consent to each pharmaceutical company for the public  
41 disclosure of the payment sums they have received from that company.[12,22] The  
42 companies then disclose single transfers of values on their websites. First data were  
43 disclosed 2016 for payments of the year 2015. The investigative newsroom CORRECTIV  
44 subsequently gathered all data from pharmaceutical companies that follow this transparency  
45 codex and established the “Euros for Doctors” database, aiming to provide easy access to  
46 the disclosed data. They accompanied the kick-off of the Euros for Doctors database with  
47 investigative articles [23], collaborating with the popular German online news magazine  
48 SPIEGEL ONLINE. Since this media attention might have had unintended effects on  
49 disclosers, this study also exploratively investigates the role of the media.  
50  
51  
52  
53  
54  
55  
56  
57  
58  
59  
60

## Study aims and research questions

The study aims were to (A) predict physicians' consent to disclose through their experiences with COI disclosure in the previous year and (B) investigate whether these experiences differ between the first and second year of the transparency regulation. Research question 1 is: Does a physician's subjective appraisal of reactions to disclosure in one year and the descriptive norm to disclose predict the decision to disclose in the following year? Does a positive attitude towards transparency moderate this relationship? We hypothesized that the probability for deciding against disclosure in the subsequent year was higher the more unpleasant reactions were perceived and the lower the percentage of people agreeing to disclose is estimated, and that a positive attitude towards transparency moderates this relationship. Research questions 2 and 3 are: Do physicians experience a higher number of reactions and more negative reactions in the first than in the second year of the regulation? We hypothesized that reactions in the first year were more frequent and more negative than in the following year.

## METHODS

### Sample

Our sample was drawn from the population of 28,230 HCPs who disclosed at least one financial interaction with a pharmaceutical company in 2015 or 2016 in the German transparency regulation.[12] We built our sample of 5 groups, consisting of HCPs who disclosed only 2015 (group 1), only 2016 (group 2), 2015 and 2016 with approximately equal payment sums (group 3), with higher payment sums 2015 than 2016 (group 4) and with lower payment sums 2015 than 2016 (group 5)<sup>1</sup>. We focused on HCPs who firstly, disclosed an annual payment sum  $\geq 1,000$  € and secondly, worked as physicians at the time point of the survey. We excluded 19,267 HCPs with annual payment sums  $< 1,000$  €. From the remaining 8,963 HCPs, possible participants were selected (see below). The second criterion was evaluated after selection: for each chosen HCP we verified by internet research whether they currently worked as a physician. If they did not or no information was available, another HCP was randomly selected, and it was checked whether they worked as physicians. This was repeated until the determined sample size was reached.

---

<sup>1</sup> Groups 3-5 were further investigated in the underlying dissertation [24]. For the purpose of this study, these groups are not further compared.

## Procedure and sample size

For the planned regression model, an analysable sample of 150 participants (30 per group) was estimated based on Green's rule of thumb.[25] Expecting a response rate of 30-50%, we formulated a detailed sample plan: Starting in August 2018, we sent out questionnaires in waves of 50 questionnaires per group. Questionnaires were sent by mail, accompanied by a cover letter and a reply envelope. A reminder letter was sent after two weeks. Two weeks after that, we phoned those with a publicly available phone number. If the planned sample size was not reached a month after the last contact attempt, the next wave was started: The next 50 physicians were randomly selected and contacted as described above. We stopped this procedure for each group after the 30th questionnaire was received, which was after we had sent the third wave of questionnaires in February 2019. All examinable questionnaires that we received afterwards were also included in the data analysis. Study procedures were preregistered at [www.osf.io/ztvur](http://www.osf.io/ztvur).

## Questionnaire

The two-page questionnaire contains questions about demographics, disclosure, and attitude towards transparency in German language. Response formats include five-level Likert items, default categories, and open formats. All items and response options can be found in Supplement A.

## Main outcomes

The items to investigate research questions 1–3 are listed in Table 1. Physicians were asked about the frequency, content, and pleasantness of reactions that they experienced. Those questions could be answered separately for the reactions of patients, colleagues, and the private environment. For the analyses of the main research questions, an average value was calculated across the three groups of people. Participants of group 2 were asked about reactions to their disclosure 2016; all other participants were asked about reactions to their disclosure 2015.

**Table 1.***Translated List of Relevant Questionnaire Items With Response Format*

| Variable                   | Item<br>Response format                                                                                                                                                         |
|----------------------------|---------------------------------------------------------------------------------------------------------------------------------------------------------------------------------|
| <b>Research question 1</b> |                                                                                                                                                                                 |
| Pleasantness of reactions  | “If there were reactions, how did you perceive them?”<br><i>1-5: very unpleasant, rather unpleasant, neutral, rather pleasant, very pleasant</i>                                |
| Descriptive norm           | “What percentage of German physicians do you estimate consented to disclose in the database?”<br><i>___ % (open format in percent)</i>                                          |
| Attitude                   | “To what extent do you agree with the following statement: In principle, I approve of transparency.”<br><i>1-5: strongly disagree, disagree, neutral, agree, strongly agree</i> |
| <b>Research question 2</b> |                                                                                                                                                                                 |
| Frequency of reactions     | “How many reactions did you get from patients / colleagues / your private environment?”<br><i>1-5: none, very few, rather few, rather many, many</i>                            |
| <b>Research question 3</b> |                                                                                                                                                                                 |
| Content of reactions       | “If there were reactions, how was their content?”<br><i>1-5: very negative, somewhat negative, neutral, somewhat positive, very positive</i>                                    |

*Note.* The original questionnaire was in German; the translated complete questionnaire can be found in Supplement A.

## Analysis

To investigate hypothesis 1, a multiple logistic regression with the outcome variable disclosure 2016 (0 = no disclosure, 1 = disclosure) and the main predictors X1: pleasantness of reactions, and X2: descriptive norm was conducted. To investigate the moderating role of X3: attitude, two interaction terms were added as predictors: X3\*X1 and X3\*X2. To test hypothesis 2 and 3, the frequency and content of reactions 2015 were compared with the frequency and content of reactions 2016. Directed tests for independent samples were conducted (more frequent/more negative reactions in 2015 than 2016). To test for normal distribution, the Shapiro-Wilk test was used. Data in all groups were not normally distributed on the respective dependent variable, therefore Wilcoxon tests were conducted. Effect sizes with 95% CI are given as rank-biserial correlations ( $r_b$ ). A conservative alpha level of .01 was used for all tests.

Exploratively, we performed a content analysis of answers to the question "Was there anything that bothered you about the reactions?". All answers were reviewed by two researchers independently and categories were suggested. From the suggested categories, ten final categories were decided upon based on mutual consensus. Then, each answer was categorized independently (overall interrater agreement: 93%). Diverging ratings were discussed until consensus was reached. Statistical analyses were performed in JASP version 0.10.2,[26] RStudio, R version 3.6.1,[27] and Microsoft Excel (2011).

## Patient and public involvement

Patients and/or the public were not involved in the design, or conduct, or reporting, or dissemination plans of this research.

## RESULTS

### Sample

We contacted  $n = 750$  physicians and received 236 filled-in questionnaires (Figure 1). The response rate was 35% (236/678; 72 questionnaires were undeliverable). Two questionnaires needed to be excluded. The remaining 234 questionnaires were allocated to the groups and analysed. Mean and median age of participants was 53 years ( $SD = 8.29$ ;  $IQR = 10$ ; Range: 31-75; 48/234 (21%) female; 185/234 (79%) male). Further sample characteristics are listed in Supplement B.

1  
2  
3  
4  
5 - Insert Figure 1 about here -  
6  
7  
8

### 9 Participants' use of the transparency database

10  
11 Of the 234 participants, 87 (37%) stated they had not looked at the database, and  
12 131 (56%) reported to have at least somewhat followed media coverage about the database.  
13 Most participants said they did not know whether their payments had been correctly  
14 reported: Of 189 participants who agreed to disclose payments in 2015, 91 (48%) did not  
15 know; 70 (37%) said their payments had been correctly reported, and 24 (13%) said they  
16 had been incorrectly reported. Of 192 participants who agreed to disclose payments in 2016,  
17 105 (55%) did not know, 60 (31%) said their payments had been correctly reported and 23  
18 (13%) said they had been incorrectly reported.  
19  
20  
21  
22  
23

### 24 Reactions participants received

25  
26 Most participants stated they had not received any reactions from patients (190/234,  
27 81%), colleagues (128/234, 55%) or the private environment (153/234, 65%). Response  
28 rates for items of content and pleasantness of reactions were between 26% (60/234,  
29 pleasantness of patients' reactions) and 48% (113/234, content of colleagues' reactions).  
30 See Figure 2 for detailed results.  
31  
32  
33  
34  
35

36 - insert Figure 2 about here -  
37  
38  
39  
40

### 41 Descriptive norm

42  
43 For investigating how high participants estimated the percentage of German  
44 physicians who disclosed in the database in 2015 and 2016, data were available from 216  
45 and 218 participants and ranged between 0% and 100%. For 2015, participants estimated  
46 on average that 33% of German physicians had agreed to disclose ( $SD = 21$ ,  $Mdn = 30$ ,  
47  $IQR = 30$ ) and for 2016, participants estimated on average that 31% of German physicians  
48 agreed to disclose ( $SD = 20$ ,  $Mdn = 25$ ,  $IQR = 25$ ).  
49  
50  
51  
52  
53

### 54 Investigating non-disclosure

55  
56 To answer research question 1, we investigated data of those participants who  
57 disclosed in 2015 (groups 1, 3-5;  $n = 189$ ) to predict whether they disclosed again in 2016  
58 (groups 3-5;  $n = 147$ ) or did not disclose again in 2016 (group 1;  $n = 42$ ). Neither regression  
59  
60

model 1 with the three predictor variables X1: pleasantness of reactions, X2: descriptive norm and X3: attitude significantly improved the model fit compared to the null model ( $\chi^2 = 1.0, p = .792$ ) nor regression model 2, in which the interaction terms X3\*X2 and X3\*X1 were added ( $\chi^2 = 12.66, p = .027$ ). The low pseudo- $R^2$ -values indicate that this prediction model is of poor quality. A more detailed description of regression model 1 and 2 can be seen in Supplement C.

We additionally explored the reasons for participants' non-disclosure in general. In our sample, two groups did not disclose payments in one year: Participants of group 1 had an entry in 2015 but not in 2016 ( $n = 42$ , „no-more-group“), and participants of group 2 had no entry in 2015 but in 2016 ( $n = 45$ , „not-yet-group“). We asked these participants for the reason for the missing entry (Table 2). The most frequently chosen reason in the no-more-group was that they had consciously decided against disclosure (50%, vs. 18% in the not-yet-group). The most frequently chosen answer in the not-yet-group was that they were not asked for their consent to disclose (36%, vs. 7% in the no-more-group). We further asked how several statements applied to the participants in case they consciously decided against disclosure. Most participants reported that considerations of public opinion or media reporting led to the decision against disclosure (25/32, 78%) (Figure 3).

**Table 2**  
*Reasons for Non-disclosure*

|                                                              | No-more-group             | Not-yet-group             |
|--------------------------------------------------------------|---------------------------|---------------------------|
| <b>You don't have an entry in the year 2015 (2016). Why?</b> | <i>abs. frequency (%)</i> | <i>abs. frequency (%)</i> |
| I have not received any payments.                            | 14/42 (33%)               | 10/45 (22%)               |
| I was not asked for my consent to disclose.                  | 3/42 (7%)                 | 16/45 (36%)               |
| I forgot to answer the inquiry for disclosure consent.       | 1/42 (2%)                 | 2/45 (4%)                 |
| I consciously decided against disclosure.                    | 21/42 (50%)               | 8/45 (18%)                |
| No reply                                                     | 3/42 (7%)                 | 9/45 (20%)                |

*Note.* Participants were asked to choose one of the four options.

1  
2  
3  
4  
5  
6 - insert Figure 3 about here -  
7  
8  
9

## 10 Year of disclosure

11  
12 To investigate research questions 2 and 3, we compared the frequency and content  
13 of reactions to participants who disclosed for the first time in 2015 (groups 1, 3-5) with data  
14 of participants who disclosed for the first time in 2016 (group 2). Data for frequency of  
15 reactions were available for 2015 from 187/198 (99%) and for 2016 from 44/45 (98%)  
16 participants; data for content of reactions were available for 2015 from 110/198 (60%) and  
17 for 2016 from 19/45 (42%) participants. All variables were significantly non-normal (all  $W =$   
18  $0.71-0.90$ , all  $p < .01$ ). Testing hypothesis 2, we found no statistically significant difference  
19 between frequency of reactions 2015 and 2016 (2015:  $M = 1.54$ ,  $SD = 0.66$ ,  $Mdn = 1.33$ ,  
20  $IQR = 1$ ; and 2016:  $M = 1.36$ ,  $SD = 0.53$ ,  $Mdn = 1.00$ ,  $IQR = 0.67$ ), as evidenced by a  
21 Wilcoxon rank-sum test ( $W = 3410$ ,  $r_b = -.17$ , 95% CI  $[-\infty, -0.01]$ ,  $p = .031$ ). Testing  
22 hypothesis 3, we found no statistically significant difference between negativity of reactions  
23 2015 and 2016 (2015:  $M = 2.69$ ,  $SD = 0.71$ ,  $Mdn = 3.00$ ,  $IQR = 1$ ; and 2016:  $M = 2.96$ ,  $SD =$   
24  $0.67$ ,  $Mdn = 3.00$ ,  $IQR = 0.33$ ), as indicated by a Wilcoxon rank-sum test ( $W = 1243$ ,  $r_b = .19$ ;  
25 95% CI  $[-0.05, \infty]$ ,  $p = .085$ ).  
26  
27  
28  
29  
30  
31  
32  
33  
34  
35

## 36 Further exploratory investigations

37  
38 Participants were asked to indicate their agreement with statements about attitude  
39 towards disclosure in general and in research. The statements that participants agreed with  
40 most strongly were that disclosure of payments should be more nuanced, that the  
41 undifferentiated display of the disclosures brings science into disrepute and that disclosure  
42 leads to a wrong impression in the public (Table 3).  
43  
44  
45  
46  
47  
48  
49  
50  
51  
52  
53  
54  
55  
56  
57  
58  
59  
60



**Table 3***Attitudes towards Transparency.*

|                                                                                                                          | <i>n</i> | Strongly disagree | Disagree        | Neutral         | Agree           | Strongly agree   |
|--------------------------------------------------------------------------------------------------------------------------|----------|-------------------|-----------------|-----------------|-----------------|------------------|
| Payments by pharmaceutical companies are a risk for the independence of clinical practice and research.                  | 233      | 26/233<br>(11%)   | 41/233<br>(18%) | 35/233<br>(15%) | 90/233<br>(39%) | 41/233<br>(18%)  |
| In principle, I approve of transparency.                                                                                 | 233      | 4/233<br>(2%)     | 3/233<br>(1%)   | 16/233<br>(7%)  | 39/233<br>(17%) | 171/233<br>(73%) |
| Collaboration with pharmaceutical companies and receiving payments by those companies is part of the medical profession. | 233      | 19/230<br>(8%)    | 35/230<br>(15%) | 66/230<br>(28%) | 71/230<br>(31%) | 39/230<br>(17%)  |
| Disclosure of payments should be more nuanced.                                                                           | 233      | 8/233<br>(3%)     | 2/233<br>(3%)   | 43/233<br>(18%) | 51/233<br>(22%) | 124/230<br>(53%) |
| Disclosure of payments increases patients' trust in me.                                                                  | 230      | 72/233<br>(31%)   | 45/233<br>(19%) | 75/233<br>(32%) | 32/233<br>(14%) | 9/233<br>(4%)    |
| Disclosure leads to a wrong impression in the public.                                                                    | 233      | 9/233<br>(4%)     | 24/233<br>(10%) | 31/233<br>(13%) | 78/233<br>(33%) | 91/233<br>(39%)  |
| In case you are working in research:                                                                                     |          |                   |                 |                 |                 |                  |
| Transparency guidelines impede my scientific work.                                                                       | 154      | 45/154<br>(29%)   | 40/154<br>(26%) | 29/154<br>(19%) | 32/154<br>(21%) | 8/154<br>(5%)    |
| I have been confronted with disclosures within the context of a published study at least once.                           | 154      | 56/154<br>(36%)   | 17/154<br>(11%) | 22/154<br>(14%) | 24/154<br>(16%) | 35/154<br>(23%)  |
| My research results were criticized because of my disclosures at least once.                                             | 152      | 119/152<br>(78%)  | 11/152<br>(7%)  | 13/152<br>(9%)  | 5/152<br>(3%)   | 4/152<br>(3%)    |
| The undifferentiated displaying of the disclosures brings science into disrepute.                                        | 155      | 10/155<br>(6%)    | 5/155<br>(3%)   | 16/155<br>(10%) | 37/155<br>(24%) | 87/155<br>(56%)  |

Sixty-eight participants answered the question “Was there anything that bothered you about the reactions?”. The content categories with respective frequencies are:

- negative media reporting (20/68, 29%)
- defamation / criminalization (17/68, 25%)
- dark figure of undisclosed information (12/68, 18%)
- disclosed information is not put into context with services rendered in return (12/68, 18%)
- misleading data representation (7/68, 10%)
- contacted by lawyer who aimed a class action against CORRECTIV (7/68, 10%)
- feeling of being dragged into the public eye (5/68, 7%)
- feeling of being treated unfairly (5/68, 7%)
- involvement of employer (4/68, 6%)
- others expressed lack of understanding (2/68, 3%).

## DISCUSSION

### Principal findings

The aim of this study was to gain insight into physicians' attitudes towards and experiences with the voluntary German transparency regulation. Research question 1 aimed to investigate how these experiences affect future disclosure behaviour, but no significant prediction model was found. Research questions 2 and 3 aimed to investigate whether reactions to disclosures between the first and the second year of the database differed. No significant difference in the frequency or content reactions was found on the alpha level of .01, which might be related to the fact that most participants in our sample had not received any reactions towards their disclosure. The fewest reactions came from patients. Only every fifth physician stated they had received at least “very few” reactions by patients.

We observed that the reasons for non-disclosure in our sample differed depending on the time point of non-disclosure: Participants who had disclosed in the first but not in the second year more often said they had consciously decided against disclosure than those who had not disclosed in the first year but in the second year. The latter more often said that they had not been asked for consent by the respective pharmaceutical company. Most physicians who had consciously decided against disclosure said it was because of public opinion and media reporting. We also found that nearly half of the participating physicians had not looked at the database and did not know whether their disclosed payment sum was correct. However, more than half of them at least somewhat followed the media coverage

1  
2  
3 about the database and some reported high objections to public exposure. This can be  
4 interpreted according to the spotlight effect which describes that people overestimate the  
5 attention they receive by others.[17] Several participants stated concerns about the public  
6 opinion and a feeling about being denounced, which is in line with the observation that  
7 physicians are concerned that COI disclosure may damage their reputation.[15] This  
8 tendency relates to the psychological heuristic that people do not like to be viewed as  
9 biased. Studies show that if people are able to avoid COI, they may be motivated to avoid  
10 such conflicts so that they can disclose the absence of conflicts.[28] In case of voluntary  
11 disclosure, however, people can simply avoid being viewed as biased by deciding against  
12 disclosure.  
13  
14  
15  
16  
17  
18  
19  
20

### 21 **Strengths and weaknesses**

22 The strength of this study is that it provides quantitative and qualitative data on  
23 physicians' experiences with COI disclosure in a national database. To our knowledge, no  
24 such evidence exists for any European transparency regulation in medicine. The  
25 investigated sample was stratified to their disclosing behaviour. Due to the otherwise random  
26 selection of participants, our sample comprises a great bandwidth of age, disciplines, and  
27 workplaces. The study, however, also has several limitations. A common problem in survey  
28 methods, answers may be skewed by social desirability.[29] The answers to a  
29 controversially discussed subject may be even more skewed: Physicians may be more  
30 motivated to respond to the survey if they have strong opinions on transparency, or if they  
31 experienced extreme reactions towards their disclosure. We tried to counter this by our  
32 efforts to increase the response rate. Additionally, the questionnaire we used was only  
33 constructed for this study, so our data cannot be directly compared to other data.  
34  
35  
36  
37  
38  
39  
40  
41  
42

### 43 **Meaning of the study**

44 While most physicians in our sample reported a positive attitude towards  
45 transparency in general, they appeared concerned about reputational damage. Those who  
46 did not disclose payments had various reasons. Mandatory transparency could approach  
47 some of these issues: Firstly, if disclosure is mandatory, it will no longer feel "unfair" that  
48 some disclose information and some hide this information. Secondly, if conducted in a  
49 standardized form, everyone's information is available, and therefore the disclosed  
50 information is easier to compare and better to interpret, which will lessen the risk of unfair  
51 reputational damage and might enable a fair discussion between pharmaceutical companies,  
52 physicians, researchers, and the public.  
53  
54  
55  
56  
57  
58  
59  
60

1  
2  
3  
4  
5  
6  
7  
8  
9  
10  
11  
12  
13  
14  
15  
16  
17  
18  
19  
20  
21  
22  
23  
24  
25  
26  
27  
28  
29  
30  
31  
32  
33  
34  
35  
36  
37  
38  
39  
40  
41  
42  
43  
44  
45  
46  
47  
48  
49  
50  
51  
52  
53  
54  
55  
56  
57  
58  
59  
60

Currently, the consent rate to disclose payments by pharmaceutical companies in Germany is low, compared to other countries.[11,12] In our study we observed that even if physicians consented to disclosure, our participants mainly appear not to have used the database nor checked their entries. Therefore, we propose that disclosers need to be educated about the background of transparency regulations and the concept of COI to raise commitment.

## Unanswered questions and future research

In this sample, reasons for non-disclosure were heterogeneous. More research is needed about the motives for and against voluntary disclosure to improve current transparency policies. Our data show that there are more issues that need to be considered about the experiences with transparency guidelines, such as the fear of reputational damage. Broad evaluations of transparency guidelines including all involved persons are needed to get a full picture of the current situation.

## CONCLUSION

The study at hand was the first survey of physicians who disclosed voluntarily in a nation-wide transparency database. We found no significant predictors for future disclosure behaviour and no statistically significant difference between reactions to disclosures in the first year compared to the second year of the database. One reason is that physicians in our sample reported to have experienced few reactions to the disclosures. The exploratory results of this study show preliminary evidence that although attitude towards transparency appears positive and only few reactions were experienced, German HCPs are concerned that disclosing payments in a public database will result in reputational damage. We propose that mandatory disclosure could be a solution to this problem by creating a standardized environment for an open discussion.

## Acknowledgements

We thank CORRECTIV for providing the database. Many thanks also to Jasmin Peifer and Marc Himmelmann for their help with the database and the paper questionnaire, and to Alexander Mancini for discussing the free answers.

## Footnotes

**Contributorship Statement:** MS, CK, KL and BE were responsible for the study conception and design. MS, KL and BE were responsible for title and abstract and full-text review. MS and LH were responsible for data extraction and validation. MS, CK and BE analysed and interpreted results. MS drafted the manuscript. All authors provided a critical review and approved the final manuscript. MS is the guarantor.

**Funding:** Funded by Volkswagen Foundation (grant no. A118085 (ref.91498) to KL).

**Competing Interests:** CK, MS and LH declared that they had received salary from the Volkswagen Foundation to conduct the project. KL declared that he had received a research grant from the Volkswagen Foundation to conduct the project. BE declared that he has no conflict of interest.

**Patient consent for publication:** not required.

**Provenance and peer review:** -

**Data sharing statement:** Data are available on reasonable request by emailing MS.

**Note:** This paper contains passages from the dissertation by Marlene Stoll [24].

**Ethics statement:** The ethics committee of the State Chamber of Physicians of Rhineland-Palatinate decided that further consultation is not necessary since no personal but anonymous data were processed (appl. no. 2018-13295-Epidemiologie).

## REFERENCES

1. Lundh A, Lexchin J, Mintzes B, et al. Industry sponsorship and research outcome: systematic review with meta-analysis. *Intensive Care Med.* 2018 Oct 1;44(10):1603–12 <https://doi.org/10.1007/s00134-018-5293-7>.
2. Mitchell AP, Trivedi NU, Gennarelli RL, et al. Are Financial Payments From the Pharmaceutical Industry Associated With Physician Prescribing? *Ann Intern Med.* 2021 Mar 16;174(3):353–61 <https://doi.org/10.7326/M20-5665>.
3. Nejtgaard CH, Bero L, Hróbjartsson A, et al. Association between conflicts of interest and favourable recommendations in clinical guidelines, advisory committee reports, opinion pieces, and narrative reviews: systematic review. *BMJ.* 2020 Dec 9;371:m4234 <https://doi.org/10.1136/bmj.m4234>.
4. Thompson D. Understanding financial conflicts of interest. *N Engl J Med.* 1993.
5. Institute of Medicine Committee on Conflict of Interest in Medical Research. The National Academies Collection: Reports funded by National Institutes of Health. In: Lo B, Field B, eds. *Conflict of interest in medical research, education, and practice.* Washington (DC): National Academies Press; 2009.
6. Fabbri A, Santos A, Mezinska S, et al. Sunshine Policies and Murky Shadows in Europe: Disclosure of Pharmaceutical Industry Payments to Health Professionals in Nine European Countries. *Int J Health Policy Manag.* 2018 Mar 14;7(6):504–9 <https://doi.org/10.15171/ijhpm.2018.20>.
7. Grundy Q, Habibi R, Shnier A, et al. Decoding disclosure: Comparing conflict of interest policy among the United States, France, and Australia. *Health Policy.* 2018 May 1;122(5):509–18 <https://doi.org/10.1016/j.healthpol.2018.03.015>.
8. Europe M-MH. Shedding Light on Transparent Cooperation in Healthcare. The way forward for sunshine and transparency laws across Europe, 2020. Available: <https://mhe-sme.org/wp-content/uploads/2019/01/MHE-SHEDDING-LIGHT-REPORT-Final.pdf>
9. Grassley C. Grassley, Kohl say public should know when pharmaceutical makers give money to doctors. Available from: <https://www.grassley.senate.gov/news/news-releases/grassley-kohl-say-public-should-know-when-pharmaceutical-makers-give-money> (accessed 13 July 2021).
10. Open Payments [Website]. Available from: <https://www.cms.gov/openpayments> (accessed 13 July 2021).
11. Mulinari S, Martinon L, Jachiet P-A, et al. Pharmaceutical industry self-regulation and non-transparency: country and company level analysis of payments to healthcare professionals in seven European countries. *Health Policy.* 2021 Jul 1;125(7):915–22

- 1  
2  
3 <https://doi.org/10.1016/j.healthpol.2021.04.015>.
- 4  
5 12. Stoll M, Hubenschmid L, Koch C, et al. Voluntary disclosures of payments from  
6 pharmaceutical companies to healthcare professionals in Germany: a descriptive study  
7 of disclosures in 2015 and 2016. *BMJ Open*. 2020 Sep 1;10(9):e037395  
8 <http://dx.doi.org/10.1136/bmjopen-2020-037395>.
- 9  
10  
11 13. Loewenstein G, Sah S, Cain DM. The Unintended Consequences of Conflict of Interest  
12 Disclosure. *JAMA*. 2012 Feb 15;307(7):669–70 <https://doi.org/10.1001/jama.2012.154>.
- 13  
14 14. Sah S, Loewenstein G, Cain DM. Insinuation Anxiety: Concern That Advice Rejection  
15 Will Signal Distrust After Conflict of Interest Disclosures. *Pers Soc Psychol Bull*.  
16 2019;45(7):1099-1112 <https://doi.org/10.1177/0146167218805991>.
- 17  
18 15. Chimonas S, DeVito NJ, Rothman DJ. Bringing Transparency to Medicine: Exploring  
19 Physicians' Views and Experiences of the Sunshine Act. *Am J Bioeth*. 2017 Jun  
20 3;17(6):4–18 <https://doi.org/10.1080/15265161.2017.1313334>.
- 21  
22 16. Boytchev WB. Warum Ärzte schweigen. 2016 Jul 17; Available from:  
23 <https://correctiv.org/aktuelles/euros-fuer-aerzte/2016/07/17/warum-aerzte-schweigen>  
24 (accessed 13 July 2021).
- 25  
26 17. Loewenstein G, Sunstein CR, Golman R. Disclosure: Psychology Changes Everything.  
27 *Annu Rev Econ*. 2014;6:391–419 <https://doi.org/10.1146/annurev-economics-080213-041341>.
- 28  
29 18. Pham-Kanter G, Mello MM, Lehmann LS, et al. Public Awareness of and Contact With  
30 Physicians Who Receive Industry Payments: A National Survey. *J Gen Intern Med*. 2017  
31 Jul 1;32(7):767–74 <http://dx.doi.org/10.1007/s11606-017-4012-3>.
- 32  
33 19. Young PD, Xie D, Schmidt H. Towards Patient-Centered Conflicts of Interest Policy. *Int J*  
34 *Health Policy Manag*. 2017 Oct 29;7(2):112–9  
35 <https://dx.doi.org/10.15171%2Fijhpm.2017.128>.
- 36  
37 20. Chung A, Rimal RN. Social norms: a review. *Rev Commun Res*. 2016;4:1–28  
38 <https://doi.org/10.12840/issn.2255-4165.2016.04.01.008>.
- 39  
40 21. Lapinski MK, Rimal RN. An Explication of Social Norms. *Commun Theory*. 2005 May  
41 1;15(2):127–47 <https://doi.org/10.1111/j.1468-2885.2005.tb00329.x>.
- 42  
43 22. Freiwillig Selbstkontrolle für die Arzneimittelindustrie e.V. FSA-Transparenzkodex. 2019.  
44 Available from: [https://www.fsa-](https://www.fsa-pharma.de/de/kodizes/sk_fsa_transparenzkodex_13.03.2019.pdf)  
45 [pharma.de/de/kodizes/sk\\_fsa\\_transparenzkodex\\_13.03.2019.pdf](https://www.fsa-pharma.de/de/kodizes/sk_fsa_transparenzkodex_13.03.2019.pdf) (accessed 13 July  
46 2021).
- 47  
48 23. CORRECTIV. Euros für Ärzte. 2021. Available from: [https://correctiv.org/aktuelles/euros-](https://correctiv.org/aktuelles/euros-fuer-aerzte)  
49 [fuer-aerzte](https://correctiv.org/aktuelles/euros-fuer-aerzte) (accessed 13 July 2021).
- 50  
51 24. Stoll M. Unintended Consequences of Conflict of Interest Disclosure: a Psychological  
52 Perspective [Internet]. Johannes Gutenberg-Universität Mainz; 2021 [cited 2021 Jul 28].  
53  
54  
55  
56  
57  
58  
59  
60

- 1  
2  
3 Available from: <https://openscience.ub.uni-mainz.de/handle/20.500.12030/5731>  
4  
5 25. Green SB. How Many Subjects Does It Take To Do A Regression Analysis. *Multivar*  
6 *Behav Res.* 1991 Jul 1;26(3):499–510 [https://doi.org/10.1207/s15327906mbr2603\\_7](https://doi.org/10.1207/s15327906mbr2603_7).  
7  
8 26. JASP Team. JASP (Version 0.10.2). 2019.  
9  
10 27. R Core Team. R: A Language and Environment for Statistical Computing. 2019.  
11 Available from: <https://www.R-project.org>  
12  
13 28. Sah S, Loewenstein G. Nothing to Declare: Mandatory and Voluntary Disclosure Leads  
14 Advisors to Avoid Conflicts of Interest. *Psychol Sci.* 2014;25(2):575-584  
15 <https://doi.org/10.1177%2F0956797613511824>.  
16  
17 29. Barclay S, Todd C, Finlay I, et al. Not another questionnaire! Maximizing the response  
18 rate, predicting non-response and assessing non-response bias in postal questionnaire  
19 studies of GPs. *Fam Pract.* 2002 Feb 1;19(1):105–11  
20 <https://doi.org/10.1093/fampra/19.1.105>.  
21  
22  
23  
24  
25  
26  
27  
28  
29

## 30 Figures

31  
32  
33 **Figure 1.** Participant Flow Chart.

34  
35 **Figure 2.** Relative Frequencies of Item Answers for Frequency, Content, and Pleasantness  
36 of Reactions from Recipients, N = 234.

37  
38  
39 **Figure 3.** Factors Considered for Decision Against Disclosure.  
40  
41  
42  
43  
44  
45  
46  
47  
48  
49  
50  
51  
52  
53  
54  
55  
56  
57  
58  
59  
60



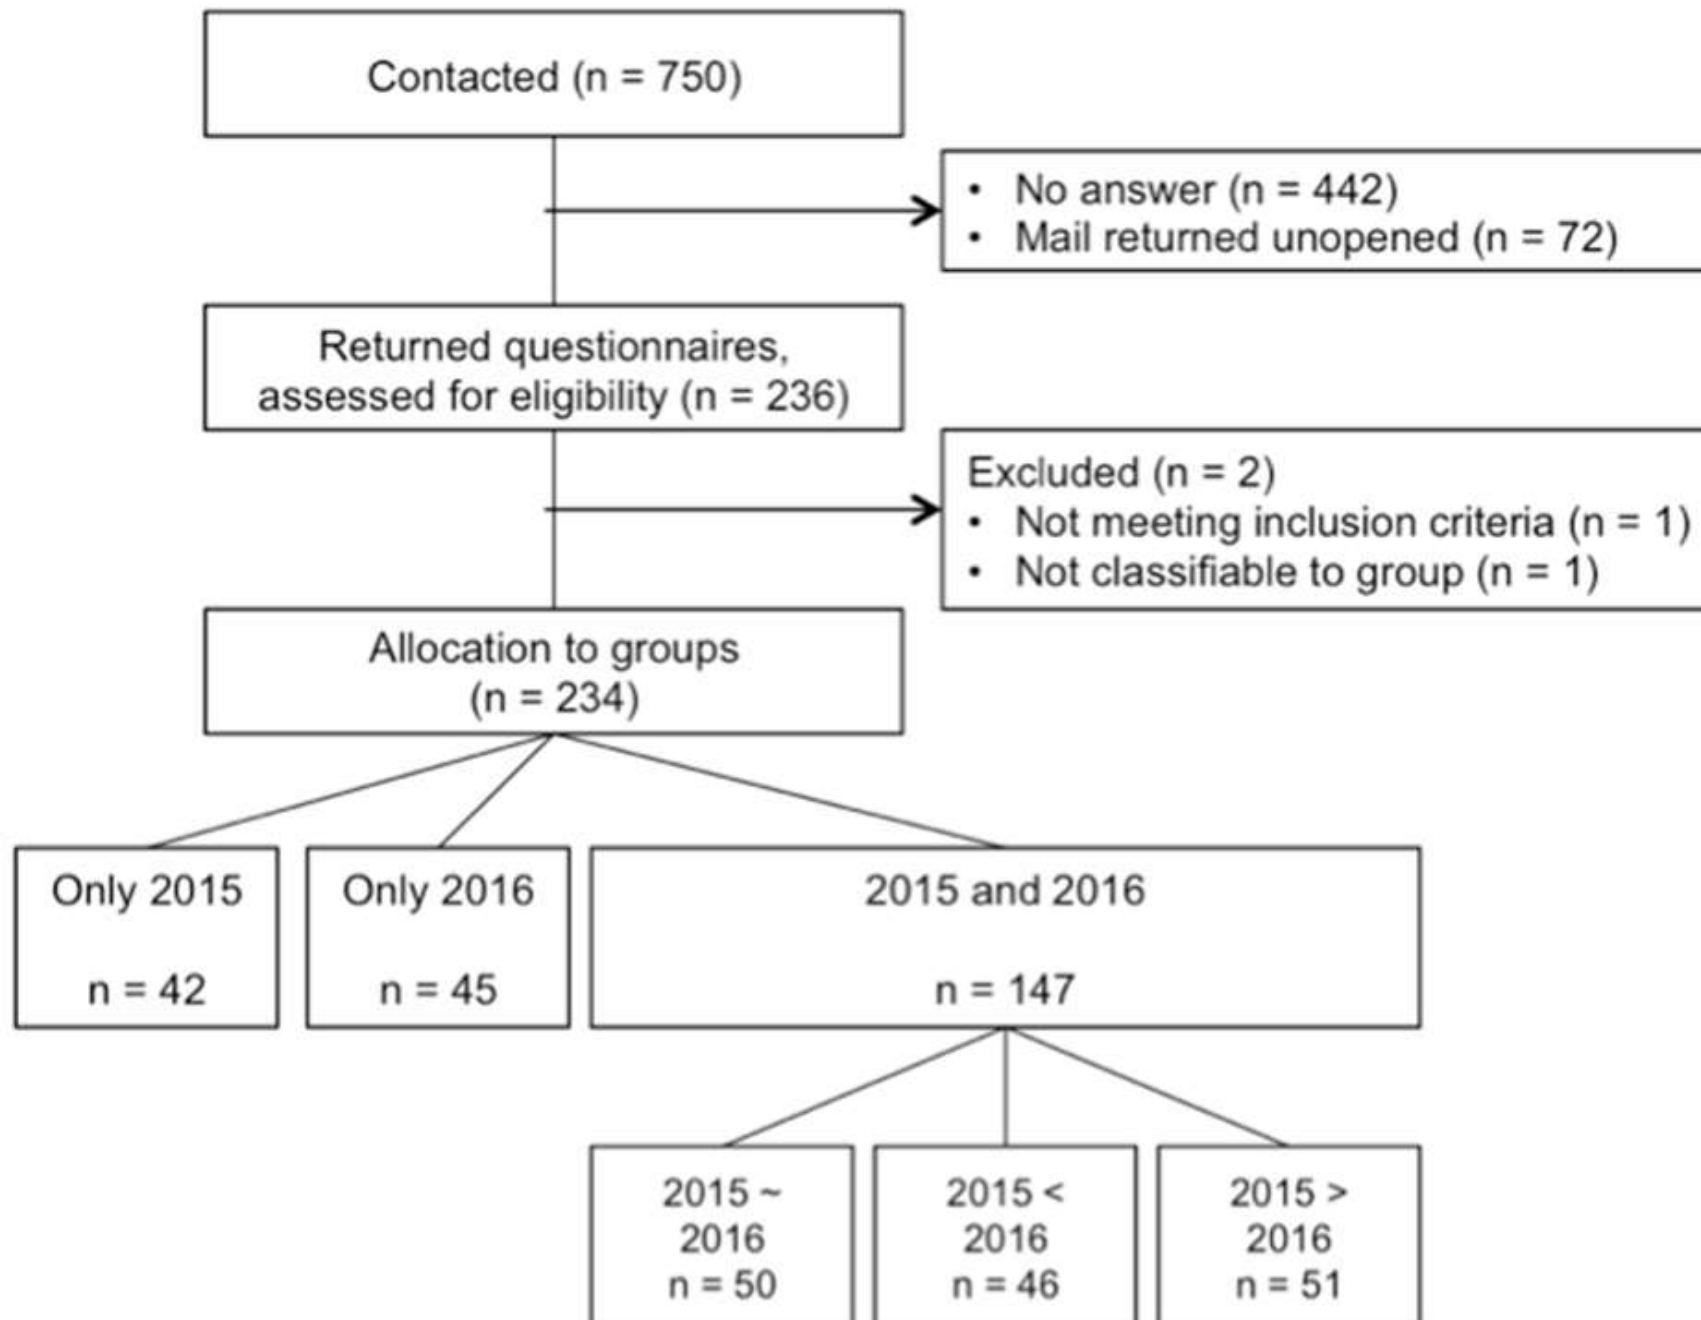

**Frequency of Reactions**

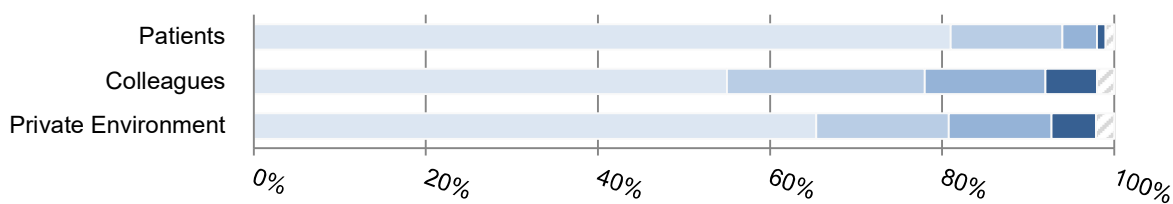

|               | Private Environment | Colleagues | Patients |
|---------------|---------------------|------------|----------|
| ■ none        | 65%                 | 55%        | 81%      |
| ■ very few    | 15%                 | 23%        | 13%      |
| ■ rather few  | 12%                 | 14%        | 4%       |
| ■ rather many | 5%                  | 6%         | 1%       |
| ■ many        | 0%                  | 0%         | 0%       |
| ▨ NA          | 2%                  | 2%         | 1%       |

**Content of Reactions**

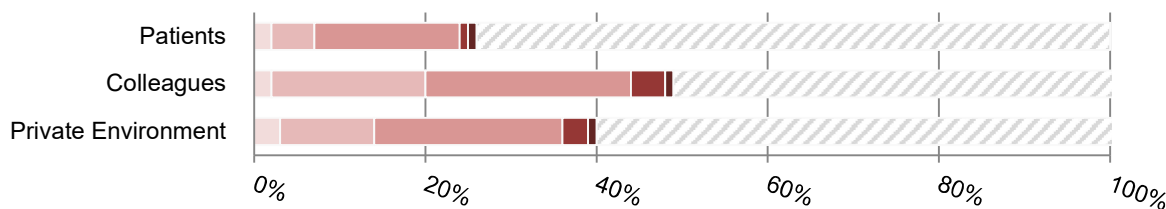

|                 | Private Environment | Colleagues | Patients |
|-----------------|---------------------|------------|----------|
| ■ very negative | 3%                  | 2%         | 2%       |
| ■ negative      | 11%                 | 18%        | 5%       |
| ■ neutral       | 22%                 | 24%        | 17%      |
| ■ positive      | 3%                  | 4%         | 1%       |
| ■ very positive | 1%                  | 1%         | 1%       |
| ▨ NA            | 61%                 | 52%        | 74%      |

**Pleasantness of Reactions**

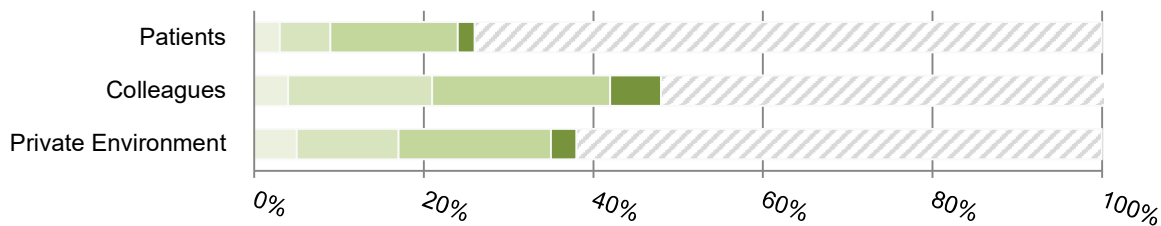

|                     | Private Environment | Colleagues | Patients |
|---------------------|---------------------|------------|----------|
| ■ very unpleasant   | 5%                  | 4%         | 3%       |
| ■ rather unpleasant | 12%                 | 17%        | 6%       |
| ■ neutral           | 18%                 | 21%        | 15%      |
| ■ rather pleasant   | 3%                  | 6%         | 2%       |
| ■ very pleasant     | 0%                  | 0%         | 0%       |
| ▨ NA                | 62%                 | 53%        | 74%      |

1  
2  
3  
4  
5  
6  
7  
8  
9  
10  
11  
12  
13  
14  
15  
16  
17  
18  
19  
20  
21  
22  
23  
24  
25  
26  
27  
28  
29  
30  
31

**Which factors did you consider in your decision against disclosure?**

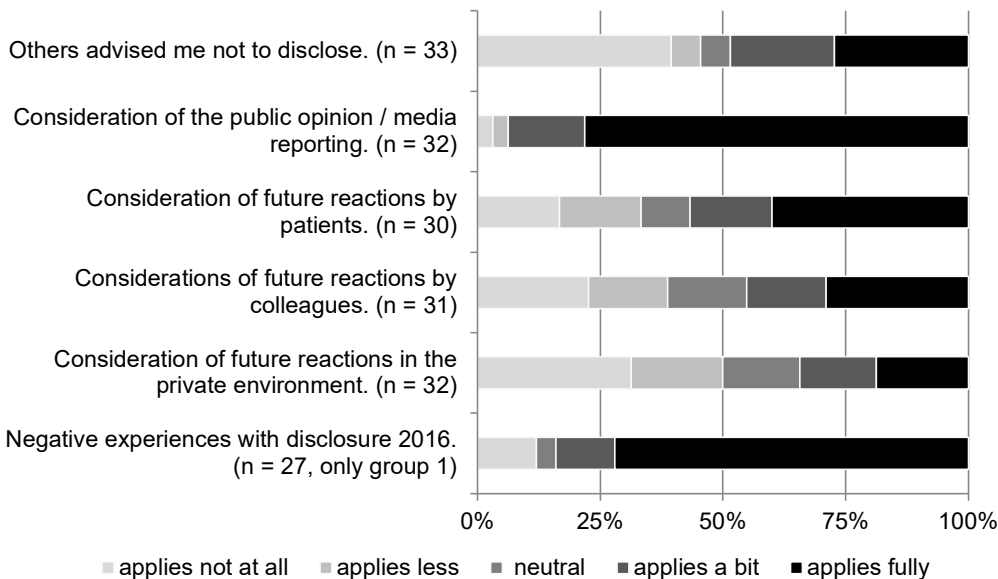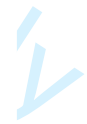

**Supplement A***Translated Questionnaire (not formatted)***1) Discipline:**

[open format]

**2) Gender:**

- male
- female

**3) Age:**

[open format]

**4) Do you work in a hospital?**

- yes, university hospital
- yes, non-university hospital
- no

**5) If yes: Which position do you have?**

- head
- senior
- resident

**6) If no: How do you work?**

- licensed
- employed
- other

**7) How much of your working hours (in %) do you spend on patient care?**

[open format]

**8) How much of your working hours (in %) do you spend on research?**

[open format]

**9) Please tick every box that resembles a research area that you have been actively working in in the last five years (multiple responses are possible).**

- non-interventional post-marketing studies
- clinical studies on behalf of pharmaceutical companies
- clinical studies investigated by yourself
- own, academical research
- other: \_\_\_\_\_
- I do not work in research.

**10) What percentage of German physicians do you estimate consented to disclose in the database?**

In 2016 for disclosure 2015: [open format]

In 2017 for disclosure 2016: [open format]

1  
2  
3 **11) Do you know the actual percentage approximately, for example from the media?**  
4

5 2016:

- 6  yes  
7  no  
8

9 2017:

- 10  yes  
11  no  
12  
13

14 **12) Have your information about payments been correctly reported in the database?**  
15 **“Euros for Doctors”?**  
16

17 [groups 1, 3-5] In 2017 for 2016:

- 18  yes  
19  no  
20  I don't know  
21

22  
23 [groups 2-5] In 2016 for 2015:

- 24  yes  
25  no  
26  I don't know  
27  
28

29 **13) In the summer of 2016, first data were disclosed in the database. How much do the**  
30 **following statements apply to you?**  
31

- 32 - I looked into the database.  
33 - I followed media coverage about the database.  
34 - I searched for persons in the database.  
35

36 scale:

- 37  applies not at all  
38  applies less  
39  neutral  
40  applies a bit  
41  applies fully  
42  
43

44 **14) How high is the amount of money you disclosed, compared to the other disclosed**  
45 **payments?**  
46

- 47  definitely below average  
48  somewhat below average  
49  average  
50  somewhat above average  
51  definitely above average  
52  
53  
54  
55  
56  
57  
58  
59  
60

1  
2  
3 **15. 1) [group 1, 3-5] You disclosed data in 2015. We are interested in how your**  
4 **environment reacted to this entry.**

5 **15.2) [group 2] You disclosed data in 2015. We are interested in how your environment**  
6 **reacted to this entry.**

7  
8  
9 **How many reactions did you get from ...**

- 10 - **patients?**
- 11 - **colleagues?**
- 12 - **your private environment?**

13  
14 **scale:**

- 15  none
- 16  very few
- 17  rather few
- 18  rather many
- 19  many

20  
21  
22  
23 **16) If there were reactions, how was their content? Reactions from ...**

- 24 - **patients**
- 25 - **colleagues**
- 26 - **your private environment**

27  
28 **scale:**

- 29  very negative
- 30  somewhat negative
- 31  neutral
- 32  somewhat positive
- 33  very positive

34  
35  
36 **17) If there were reactions, how did you perceive them? Reactions from ...**

- 37 - **patients**
- 38 - **colleagues**
- 39 - **your private environment**

40  
41 **scale:**

- 42  very unpleasant
- 43  rather unpleasant
- 44  neutral
- 45  rather pleasant
- 46  very pleasant

47  
48  
49 **18) Was there anything that bothered you about the reactions?**

50 [open format]

51  
52  
53  
54 **19.1) [group 1] You do not have an entry in the database in the year 2016. Why?**

55 **19.2) [group 2] You do not have an entry in the database in the year 2015. Why?**

- 56  I have not received any payments.
- 57  I was not asked for my consent to disclose.
- 58  I forgot to answer the inquiry for disclosure consent.
- 59  I consciously decided against disclosure.

1  
2  
3  
4 **20.1) [group 1] In case you decided consciously against disclosure: Which factors did**  
5 **you consider in your decision against disclosure?**  
6

- 7 - Others advised me not to disclose.
- 8 - Consideration of the public opinion / media reporting.
- 9 - Consideration of future reactions by patients.
- 10 - Consideration of future reactions by colleagues.
- 11 - Consideration of future reactions in the private surrounding.
- 12 - Negative experiences with disclosure 2015.

13  
14 scale:

- 15  applies not at all
- 16  applies less
- 17  neutral
- 18  applies a bit
- 19  applies fully

20  
21  
22  
23 **20.2) [group 2] In case you decided consciously against disclosure: Which factors did**  
24 **you consider in your decision against disclosure?**

- 25 - Others advised me not to disclose.
- 26 - Consideration of the public opinion / media reporting.
- 27 - Consideration of future reactions by patients.
- 28 - Consideration of future reactions by colleagues.
- 29 - Consideration of future reactions in the private surrounding.

30  
31 scale:

- 32  applies not at all
- 33  applies less
- 34  neutral
- 35  applies a bit
- 36  applies fully

37  
38  
39  
40 **20.3) [groups 3-5] In 2016, you decided to disclose a second time. Please state how**  
41 **much the following statements apply to you.**

- 42 - [groups 3-5] Coming to decision whether or not to disclose was easier for the second  
43 year than for the first year.
- 44 - [groups 4,5] My payments shifted because the opportunities by the pharmaceutical  
45 companies changed.
- 46 - [group 4] My payments shifted because I consciously accepted more money.
- 47 - [group 5] My payments shifted because I consciously accepted less money.

48  
49 scale:

- 50  applies not at all
- 51  applies less
- 52  neutral
- 53  applies a bit
- 54  applies fully

1  
2  
3 **21) To what extent do you agree with the following statements:**

- 4 - Payments by pharmaceutical companies are a risk for the independence of clinical  
5 practice and research.  
6  
7 - Disclosure of payments increases patients' trust in me.  
8  
9 - Receiving payments is fine if regulation measures (disclosure, exclusion from  
10 committees) are adopted.  
11  
12 - In principle, I approve of transparency.  
13  
14 - Disclosure leads to a wrong impression in the public.  
15  
16 - Collaboration with pharmaceutical companies and receiving payments by those  
17 companies is part of the medical profession.  
18  
19 - Some payments should be avoided, while others are indispensable.  
20  
21 - Without good alternatives in research and training, nothing about financial  
22 interactions in the medical sector will change.  
23  
24 - Disclosure of payments should be more nuanced.

25 In case you are working in research:

- 26 - Transparency guidelines impede my scientific work.  
27  
28 - I have been confronted with disclosures within the context of a published study at  
29 least once.  
30  
31 - My research results were criticized because of my disclosures at least once.  
32  
33 - If I do not cooperate with the industry, the research that is relevant for me lacks  
34 financial resources.  
35  
36 - The undifferentiated displaying of the disclosures brings science into disrepute.

37 scale:

- 38  strongly disagree  
39  disagree  
40  neutral  
41  agree  
42  strongly agree

43 **22) In your opinion: Disclosure of financial payments is more important in which  
44 area?**

- 45  definitely in patient care  
46  rather in patient care  
47  equally important  
48  rather in research  
49  definitely in research  
50  
51  
52  
53  
54  
55  
56  
57  
58  
59  
60



## Supplement B

### Sample Characteristics

| Characteristic | <i>n</i>                                 | %   |    |
|----------------|------------------------------------------|-----|----|
| Gender         | Female                                   | 48  | 21 |
|                | Male                                     | 185 | 79 |
|                | NA                                       | 1   | 0  |
| Field          | General and internal medicine            | 129 | 55 |
|                | Psychiatry, neurology and psychosomatics | 33  | 14 |
|                | Surgery                                  | 31  | 13 |
|                | Other                                    | 38  | 16 |
| Workplace      | University hospital                      | 67  | 29 |
|                | Non-university hospital                  | 51  | 22 |
|                | <i>Of which position: Head</i>           | 49  | 42 |
|                | <i>Senior</i>                            | 53  | 19 |
|                | <i>Resident</i>                          | 11  | 9  |
|                | NA                                       | 5   | 4  |
|                | Practice                                 | 113 | 48 |
|                | <i>Of which: Licensed</i>                | 104 | 92 |
|                | <i>Employed</i>                          | 9   | 8  |
|                | NA                                       | 3   | 1  |

Note. N= 234

## Supplement C

### *Investigating non-disclosure, regression analysis.*

To answer the first research question, we investigated data of those participants who disclosed in 2015 ( $n = 189$ ) to predict whether they disclosed again in 2016 ( $n = 147$ , 78%) or did not disclose again in 2016 ( $n = 42$ , 22%). Response rate per item differed: For the items attitude, descriptive norm 2015, and pleasantness of reactions 2015, data were available from 188, 174, and 107 participants, respectively. For pleasantness of reactions 2015, we thus only had data of 22 people who did not disclose in 2016. All variables were significantly non-normal: all  $W = 0.52 - 0.92$ , all  $p < .01$ .

In regression model 1, the predictors were the three variables X1: pleasantness of reactions, X2: descriptive norm and X3: attitude. This model did not significantly improve the model fit compared to the null model,  $\chi^2 = 1.0$ ,  $p = .792$ . Regression model 2 included the three variables as well as the interaction terms X3\*X2 as well as X3\*X1. This second model also did not significantly improve the model fit compared to the null model,  $\chi^2 = 12.66$ ,  $p = .027$ . Effect sizes, pseudo- $R^2$ -values and variance inflation factors ( $VIF$ ) of regression model 1 and 2 can be seen in Table C1. The pseudo- $R^2$ -values, being very low, indicate that this prediction model is of poor quality. We further explored the data by investigating whether participants who disclosed in 2016 had systematically different values on the main outcomes from the participants who did not disclose in 2016. Results from the performed Wilcoxon tests provided no indication for systematic differences between the groups (all  $p < .01$ ).

**Table C1***Logistic Regression Coefficients and Effect Sizes of Regression Model 1 and 2*

|                                                        | <i>B (SE)</i> | <i>p</i> | <i>OR</i> |
|--------------------------------------------------------|---------------|----------|-----------|
| Regression model 1: Only main effects                  |               |          |           |
| Intercept                                              | 1.54 (0.28)   | .000     | 4.66      |
| Pleasantness of reactions                              | 0.24 (0.27)   | .373     | 1.27      |
| Descriptive norm                                       | 0.13 (0.37)   | .717     | 1.14      |
| Attitude                                               | -0.10 (0.32)  | .753     | 0.90      |
| Regression model 2: Main effects and interaction terms |               |          |           |
| Intercept                                              | 2.31 (0.60)   | .000     | 10.11     |
| Pleasantness of reactions                              | 0.61 (0.42)   | .142     | 1.84      |
| Descriptive norm                                       | -0.06 (0.46)  | .891     | 0.94      |
| Attitude                                               | -1.57 (1.08)  | .145     | 0.21      |
| Attitude*pleasantness of reactions                     | -1.27 (0.64)  | .048     | 0.28      |
| Attitude*descriptive norm                              | 0.98 (0.67)   | .140     | 2.67      |

*Note.* Model fit regression model 1:  $R^2 = .01$  (Hosmer-Lemeshow), .01 (Cox-Snell), .02 (Nagelkerke); model 1 compared to null model:  $\chi^2(3) = 1.04$ ,  $p = .792$ , all  $VIF < 10$ ; Model fit regression model 2:  $R^2 = .01$  (Hosmer-Lemeshow), .01 (Cox-Snell), .02 (Nagelkerke); model 2 compared to null model:  $\chi^2(5) = 12.66$ ,  $p = .027$ ; model 2 compared to model 1:  $\chi^2(2) = 11.63$ ,  $p = .003$ , all  $VIF < 10$ .

**STROBE 2007 (v4) checklist of items to be included in reports of observational studies in epidemiology\***  
**Checklist for cohort, case-control, and cross-sectional studies (combined)**

| Section/Topic             | Item # | Recommendation                                                                                                                                                                                                                                                                                                                                                                                                                                                         | Reported on page # |
|---------------------------|--------|------------------------------------------------------------------------------------------------------------------------------------------------------------------------------------------------------------------------------------------------------------------------------------------------------------------------------------------------------------------------------------------------------------------------------------------------------------------------|--------------------|
| Title and abstract        | 1      | (a) Indicate the study's design with a commonly used term in the title or the abstract                                                                                                                                                                                                                                                                                                                                                                                 | 1                  |
|                           |        | (b) Provide in the abstract an informative and balanced summary of what was done and what was found                                                                                                                                                                                                                                                                                                                                                                    | 2                  |
| <b>Introduction</b>       |        |                                                                                                                                                                                                                                                                                                                                                                                                                                                                        |                    |
| Background/rationale      | 2      | Explain the scientific background and rationale for the investigation being reported                                                                                                                                                                                                                                                                                                                                                                                   | 4-6                |
| Objectives                | 3      | State specific objectives, including any pre-specified hypotheses                                                                                                                                                                                                                                                                                                                                                                                                      | 7                  |
| <b>Methods</b>            |        |                                                                                                                                                                                                                                                                                                                                                                                                                                                                        |                    |
| Study design              | 4      | Present key elements of study design early in the paper                                                                                                                                                                                                                                                                                                                                                                                                                | 7-8                |
| Setting                   | 5      | Describe the setting, locations, and relevant dates, including periods of recruitment, exposure, follow-up, and data collection                                                                                                                                                                                                                                                                                                                                        | 7-9                |
| Participants              | 6      | (a) <i>Cohort study</i> —Give the eligibility criteria, and the sources and methods of selection of participants. Describe methods of follow-up<br><i>Case-control study</i> —Give the eligibility criteria, and the sources and methods of case ascertainment and control selection. Give the rationale for the choice of cases and controls<br><i>Cross-sectional study</i> —Give the eligibility criteria, and the sources and methods of selection of participants | 7-8                |
|                           |        | (b) <i>Cohort study</i> —For matched studies, give matching criteria and number of exposed and unexposed<br><i>Case-control study</i> —For matched studies, give matching criteria and the number of controls per case                                                                                                                                                                                                                                                 | NA                 |
| Variables                 | 7      | Clearly define all outcomes, exposures, predictors, potential confounders, and effect modifiers. Give diagnostic criteria, if applicable                                                                                                                                                                                                                                                                                                                               | 8-9                |
| Data sources/ measurement | 8*     | For each variable of interest, give sources of data and details of methods of assessment (measurement). Describe comparability of assessment methods if there is more than one group                                                                                                                                                                                                                                                                                   | 8-9, Supplement A  |
| Bias                      | 9      | Describe any efforts to address potential sources of bias                                                                                                                                                                                                                                                                                                                                                                                                              | 8                  |
| Study size                | 10     | Explain how the study size was arrived at                                                                                                                                                                                                                                                                                                                                                                                                                              | 8                  |
| Quantitative variables    | 11     | Explain how quantitative variables were handled in the analyses. If applicable, describe which groupings were chosen and why                                                                                                                                                                                                                                                                                                                                           | 8-10               |
| Statistical methods       | 12     | (a) Describe all statistical methods, including those used to control for confounding                                                                                                                                                                                                                                                                                                                                                                                  | 10                 |
|                           |        | (b) Describe any methods used to examine subgroups and interactions                                                                                                                                                                                                                                                                                                                                                                                                    | NA                 |
|                           |        | (c) Explain how missing data were addressed                                                                                                                                                                                                                                                                                                                                                                                                                            | NA                 |
|                           |        | (d) <i>Cohort study</i> —If applicable, explain how loss to follow-up was addressed<br><i>Case-control study</i> —If applicable, explain how matching of cases and controls was addressed                                                                                                                                                                                                                                                                              | 8                  |

|                          |     |                                                                                                                                                                                                              |                  |
|--------------------------|-----|--------------------------------------------------------------------------------------------------------------------------------------------------------------------------------------------------------------|------------------|
|                          |     | <i>Cross-sectional study</i> —If applicable, describe analytical methods taking account of sampling strategy                                                                                                 |                  |
|                          |     | (e) Describe any sensitivity analyses                                                                                                                                                                        |                  |
| <b>Results</b>           |     |                                                                                                                                                                                                              |                  |
| Participants             | 13* | (a) Report numbers of individuals at each stage of study—eg numbers potentially eligible, examined for eligibility, confirmed eligible, included in the study, completing follow-up, and analysed            | 7, 10            |
|                          |     | (b) Give reasons for non-participation at each stage                                                                                                                                                         | 10               |
|                          |     | (c) Consider use of a flow diagram                                                                                                                                                                           | Figure 1         |
| Descriptive data         | 14* | (a) Give characteristics of study participants (eg demographic, clinical, social) and information on exposures and potential confounders                                                                     | 10, Supplement B |
|                          |     | (b) Indicate number of participants with missing data for each variable of interest                                                                                                                          | 10-14            |
|                          |     | (c) <i>Cohort study</i> —Summarise follow-up time (eg, average and total amount)                                                                                                                             | NA               |
| Outcome data             | 15* | <i>Cohort study</i> —Report numbers of outcome events or summary measures over time                                                                                                                          | NA               |
|                          |     | <i>Case-control study</i> —Report numbers in each exposure category, or summary measures of exposure                                                                                                         | NA               |
|                          |     | <i>Cross-sectional study</i> —Report numbers of outcome events or summary measures                                                                                                                           | 10-11, Figure 2  |
| Main results             | 16  | (a) Give unadjusted estimates and, if applicable, confounder-adjusted estimates and their precision (eg, 95% confidence interval). Make clear which confounders were adjusted for and why they were included | 11-13            |
|                          |     | (b) Report category boundaries when continuous variables were categorized                                                                                                                                    | NA               |
|                          |     | (c) If relevant, consider translating estimates of relative risk into absolute risk for a meaningful time period                                                                                             | NA               |
| Other analyses           | 17  | Report other analyses done—eg analyses of subgroups and interactions, and sensitivity analyses                                                                                                               | 11-15            |
| <b>Discussion</b>        |     |                                                                                                                                                                                                              |                  |
| Key results              | 18  | Summarise key results with reference to study objectives                                                                                                                                                     | 15-16            |
| Limitations              | 19  | Discuss limitations of the study, taking into account sources of potential bias or imprecision. Discuss both direction and magnitude of any potential bias                                                   | 16               |
| Interpretation           | 20  | Give a cautious overall interpretation of results considering objectives, limitations, multiplicity of analyses, results from similar studies, and other relevant evidence                                   | 16               |
| Generalisability         | 21  | Discuss the generalisability (external validity) of the study results                                                                                                                                        | 16-17            |
| <b>Other information</b> |     |                                                                                                                                                                                                              |                  |
| Funding                  | 22  | Give the source of funding and the role of the funders for the present study and, if applicable, for the original study on which the present article is based                                                | 21               |

\*Give information separately for cases and controls in case-control studies and, if applicable, for exposed and unexposed groups in cohort and cross-sectional studies.

**Note:** An Explanation and Elaboration article discusses each checklist item and gives methodological background and published examples of transparent reporting. The STROBE checklist is best used in conjunction with this article (freely available on the Web sites of PLoS Medicine at <http://www.plosmedicine.org/>, Annals of Internal Medicine at <http://www.annals.org/>, and Epidemiology at <http://www.epidem.com/>). Information on the STROBE Initiative is available at [www.strobe-statement.org](http://www.strobe-statement.org).

# BMJ Open

## Physicians' attitudes towards disclosure of payments from pharmaceutical companies in a nation-wide voluntary transparency database: a cross-sectional survey

|                                 |                                                                                                                                                                                                                                                                                                                                                                                                                                                                                                           |
|---------------------------------|-----------------------------------------------------------------------------------------------------------------------------------------------------------------------------------------------------------------------------------------------------------------------------------------------------------------------------------------------------------------------------------------------------------------------------------------------------------------------------------------------------------|
| Journal:                        | <i>BMJ Open</i>                                                                                                                                                                                                                                                                                                                                                                                                                                                                                           |
| Manuscript ID                   | bmjopen-2021-055963.R1                                                                                                                                                                                                                                                                                                                                                                                                                                                                                    |
| Article Type:                   | Original research                                                                                                                                                                                                                                                                                                                                                                                                                                                                                         |
| Date Submitted by the Author:   | 30-Nov-2021                                                                                                                                                                                                                                                                                                                                                                                                                                                                                               |
| Complete List of Authors:       | Stoll, Marlene; Universitätsmedizin der Johannes Gutenberg-Universität Mainz, Department of Psychiatry and Psychotherapy<br>Hubenschmid, Lara; Leibniz Institute for Resilience Research gGmbH<br>Koch, Cora; Medical Center-University of Freiburg, Department of Neurology and Neurophysiology<br>Lieb, Klaus; Universitätsmedizin der Johannes Gutenberg-Universität Mainz, Department of Psychiatry and Psychotherapy<br>Egloff, Boris; Johannes Gutenberg University Mainz, Department of Psychology |
| <b>Primary Subject Heading</b>: | Health policy                                                                                                                                                                                                                                                                                                                                                                                                                                                                                             |
| Secondary Subject Heading:      | Health policy                                                                                                                                                                                                                                                                                                                                                                                                                                                                                             |
| Keywords:                       | Health policy < HEALTH SERVICES ADMINISTRATION & MANAGEMENT, Protocols & guidelines < HEALTH SERVICES ADMINISTRATION & MANAGEMENT, MEDICAL ETHICS                                                                                                                                                                                                                                                                                                                                                         |
|                                 |                                                                                                                                                                                                                                                                                                                                                                                                                                                                                                           |

SCHOLARONE™  
Manuscripts



I, the Submitting Author has the right to grant and does grant on behalf of all authors of the Work (as defined in the below author licence), an exclusive licence and/or a non-exclusive licence for contributions from authors who are: i) UK Crown employees; ii) where BMJ has agreed a CC-BY licence shall apply, and/or iii) in accordance with the terms applicable for US Federal Government officers or employees acting as part of their official duties; on a worldwide, perpetual, irrevocable, royalty-free basis to BMJ Publishing Group Ltd ("BMJ") its licensees and where the relevant Journal is co-owned by BMJ to the co-owners of the Journal, to publish the Work in this journal and any other BMJ products and to exploit all rights, as set out in our [licence](#).

The Submitting Author accepts and understands that any supply made under these terms is made by BMJ to the Submitting Author unless you are acting as an employee on behalf of your employer or a postgraduate student of an affiliated institution which is paying any applicable article publishing charge ("APC") for Open Access articles. Where the Submitting Author wishes to make the Work available on an Open Access basis (and intends to pay the relevant APC), the terms of reuse of such Open Access shall be governed by a Creative Commons licence – details of these licences and which [Creative Commons](#) licence will apply to this Work are set out in our licence referred to above.

Other than as permitted in any relevant BMJ Author's Self Archiving Policies, I confirm this Work has not been accepted for publication elsewhere, is not being considered for publication elsewhere and does not duplicate material already published. I confirm all authors consent to publication of this Work and authorise the granting of this licence.

1  
2  
3 **Physicians' attitudes towards disclosure of payments from pharmaceutical**  
4 **companies in a nation-wide voluntary transparency database: a cross-sectional**  
5 **survey**  
6  
7  
8  
9

10 Marlene Stoll\*, Lara Hubenschmid, Cora Koch, Klaus Lieb, Boris Egloff  
11  
12

13  
14 Marlene Stoll (marlene.stoll@unimedizin-mainz.de)  
15

16 Department of Psychiatry and Psychotherapy, University Medical Center Mainz, Untere Zahlbacher Straße 8,  
17 55131 Mainz, Germany

18 <http://orcid.org/0000-0001-8847-5497>  
19

20  
21 Lara Hubenschmid (lara.hubenschmid@lir-mainz.de)  
22

23 Leibniz Institute for Resilience Research (LIR), Mainz, Germany  
24

25 Cora Koch (cora.koch@uniklinik-freiburg.de)  
26

27 Department of Neurology and Neurophysiology, Medical Center - University of Freiburg, Freiburg, Germany  
28

29 <http://orcid.org/0000-0003-0827-7023>  
30

31 Klaus Lieb (klaus.lieb@lir-mainz.de)  
32

33 Department of Psychiatry and Psychotherapy, University Medical Center Mainz, Mainz, Germany  
34

35 Boris Egloff (egloff@uni-mainz.de)  
36

37 <https://orcid.org/0000-0002-5736-9912>  
38

39 Department of Psychology, Johannes Gutenberg University Mainz  
40

41 \* Corresponding author  
42  
43  
44

45 Word count: 3823  
46  
47  
48  
49  
50  
51  
52  
53  
54  
55  
56  
57  
58  
59  
60



## ABSTRACT

**Objectives:** To investigate German physicians' attitudes towards and experiences with voluntary disclosure of payments by pharmaceutical companies in a public database and their impact on future decisions for or against disclosure.

**Design:** National cross-sectional survey conducted in 2018 among physicians who voluntarily disclosed at least one payment in the German transparency regulation.

**Setting:** Retrospective paper-pencil questionnaire about attitudes towards and experiences with voluntary payment disclosures in the first (2015) and second year (2016) of the German transparency regulation.

**Participants:** German physicians who disclosed either in the first year only, the second year only, or in both years of the transparency regulation.

**Primary outcomes:** (1) the probability to disclose in 2016, predicted by physicians' experience of reactions from others in 2015, descriptive norms, and attitudes towards transparency; (2) frequency and (3) content of reactions from others 2015 compared to 2016.

**Results:** Data of 234 respondents were analysed ( $n = 42, 45, \text{ and } 147$  physicians who disclosed in 2015, 2016 or both years, respectively). The probability to disclose in 2016 was not predicted by perceived reactions, norms, or attitudes towards transparency ( $p > .01$ ). Most participants reported not to have received any reactions by patients (190/234, 81%), colleagues (128/234, 55%) or the private environment (153/234, 65%). Neither frequency nor content of reactions differed between the first and second year (scale 1-5; frequency:  $Mdn_{2015,2016} = 1.33$  vs. 1.36,  $r_b = -.17$ ,  $p > .01$ ; content:  $Mdn_{2015,2016} = 2.69$  vs. 2.96,  $r_b = .19$ ,  $p > .01$ ). However, media reporting, fear of reputational damage and a feeling of being defamed were mentioned as reasons for non-disclosure.

**Conclusions:** While confirmatory analyses did not provide significant results, descriptive analyses showed that participants who voluntarily disclose payments mainly do not experience any reactions towards their disclosures but report fears about losing their reputation due to disclosures.

**Registration:** <https://osf.io/ztvur>

## ARTICLE SUMMARY

### Strengths and limitations of this study

- This study is the first survey of attitudes and experiences of physicians who voluntarily disclosed payments by pharmaceutical companies in a nation-wide transparency database.
- The sample takes into account whether physicians disclosed only in one year or in two consecutive years.
- The study was preregistered and provides qualitative and quantitative data on reasons for non-disclosure in this database.
- The questionnaire used in this study was only constructed for this purpose, so a direct comparison with other data is not possible.

## INTRODUCTION

The services sector of the health industry has a long tradition of close ties to the pharmaceutical industry.[1,2] Such ties have been shown to potentially lead to systematic biases in research and daily patient care.[3-5] Situations in which a secondary interest (e.g., financial gain) creates a risk that a primary interest (e.g., patient welfare) is unduly influenced are defined as conflicts of interest (COI).[1,6] Several approaches have been established to meet the challenge of COI in medicine, amongst which transparency regulations are very popular.[7-10] Transparency regulations have been introduced to shed light on formerly unknown information,[7,8] in this case: information about payments from pharmaceutical companies to health care professionals (HCPs). They differ in their coverage and implementation. In the United States, payments are fully transparent since the introduction of the Physician Payments Sunshine Act (PPSA) and publicly disclosed on the Open Payments website.[11] In Europe, transparency of payments to HCPs is mandatory only in some countries whereas in others such as Germany, it is regulated on a voluntary level.[7,9,12,13] However, disclosing COI may have unintended effects (e.g., loss of patient trust [14,15]), which may interact with the mode of the transparency regulation. This study explores the effects of Germany's voluntary transparency regulation of payments by pharmaceutical companies to HCPs, and investigates factors that lead HCPs to decide against disclosing payments in this database voluntarily.

### Effects of transparency guidelines

An intended effect of transparency guidelines is that publicly disclosing COI could motivate conflicted persons to change their behaviour in the sense that they decrease industry contacts in the future.[16] Thus, transparency regulations affect those who disclose information. In focus groups about experiences with the PPSA conducted in 2015,[17] physicians reported to be frustrated with the administrative process, to feel treated unfairly and to worry the disclosures might mislead patients.[17] For voluntary regulations, there is only anecdotal evidence: In a newspaper article[18] about physicians who decided against disclosure in the German transparency database, the interviewees stated to approve of transparency in general, but also said the current regulation was unfair, the disclosed information was misleading, and patients' trust would suffer.[18]

Public awareness thus appears to be a relevant element of transparency regulations.[16] Research has shown that patients would like their physicians to disclose financial COI, since they were concerned about biased clinical judgement.[19,20] However, at least in the United States, public awareness of the Open Payments website was low, as

1  
2  
3 shown by citizen surveys in 2014 and 2015: Only 9-12 % knew about the disclosed  
4 information.[21,22] Accordingly, U.S. physicians believed patients were uninterested in the  
5 data.[17] In Germany, physicians reported to fear negative effects on patients and therefore  
6 decided against disclosure.[18] The interaction between disclosing HCPs and the public and  
7 its effects on disclosing behaviour in a voluntary transparency database has not been  
8 systematically investigated yet.  
9  
10  
11  
12

13 Another important factor when discussing the effects of voluntary transparency  
14 regulations is the descriptive norm (i.e., behaviour that most of the peers show is considered  
15 “normal” behaviour[23,24]) and thus, the moment when area-wide information about the  
16 frequency of behaviour becomes available. From then on, information is available about how  
17 many HCPs voluntarily disclose payments, which forms a new reference frame for whether it  
18 is considered “normal” to disclose payments. An HCP’s decision to voluntarily disclose  
19 payments may depend on the subjectively estimated number of disclosing HCPs.  
20 Additionally, HCPs themselves will consider the fact that HCPs receive payments by  
21 pharmaceutical companies relatively “normal”, while most of the public will only learn about it  
22 with the first disclosure round and judge the behaviour as “abnormal” - an impression which  
23 will decline over time. Therefore, reactions by the public may be more pronounced in the first  
24 year of a transparency database than in the following.  
25  
26  
27  
28  
29  
30  
31  
32  
33

### 34 **Germany’s transparency regulation**

35  
36 In Germany, transparency of payments to HCPs is self-regulated by the  
37 pharmaceutical industry: 54 pharmaceutical companies organized in the “association of  
38 voluntary self-regulation in the pharmaceutical industry” passed a transparency codex which  
39 requires HCPs’ consent for the respective financial interaction to be disclosed on each  
40 company’s website.[12,13,25] First data were disclosed 2016 for payments from 2015. The  
41 investigative newsroom CORRECTIV gathered this data from each company’s website and  
42 established the “Euros for Doctors” database - a searchable platform that provided, per  
43 HCP, an overview of all payments they had received. The database started in 2016, but it  
44 was discontinued after only two years, making the investigation of long-term changes of  
45 disclosing rates difficult.[26] The kick-off was accompanied with investigative articles,[27]  
46 collaborating with the popular German online news magazine SPIEGEL ONLINE. They  
47 criticised the undifferentiated way of disclosing (e.g., the designated use of the money was  
48 not disclosed), and the large number of HCPs who did not disclose information.[18,28] An  
49 analysis of the 2015 and 2016 data of this database by our group [13] showed that about  
50 28% and 24% of all HCPs who had received payments agreed to disclose payments in 2015  
51 and 2016, respectively. Of all disclosing HCPs, 26% disclosed payments in both years, 44%  
52  
53  
54  
55  
56  
57  
58  
59  
60

1  
2  
3 disclosed only in 2015, and 29% only in 2016. The total number of disclosing HCPs  
4 decreased by 21%.  
5  
6  
7

## 8 **Study aims and research questions**

9

10 This study investigated HCPs' attitudes towards and experiences with the voluntary  
11 transparency database, and reasons for non-disclosure. Main research question 1 was: Do  
12 the reactions physicians experienced to their disclosed information or their perception of how  
13 normal it is to disclose predict the decision to disclose in the following year? Does a positive  
14 attitude moderate this effect? We hypothesized that the probability for deciding against  
15 disclosure in the subsequent year was higher the more unpleasant reactions were  
16 experienced and the lower the descriptive norm to disclose was estimated, and that a  
17 positive attitude towards transparency moderates this relationship. Research questions 2  
18 and 3 were: Do physicians experience a higher number of reactions and more negative  
19 reactions in the first than in the second year of the regulation? We hypothesized that  
20 reactions were more frequent and more negative in the first compared to the following year.  
21  
22  
23  
24  
25  
26  
27  
28  
29  
30  
31

## 32 **METHODS**

33  
34

### 35 **Sample**

36

37 Our sample was drawn from the population of 28,230 HCPs who disclosed at least  
38 one financial interaction with a pharmaceutical company in 2015 or 2016 in the German  
39 transparency regulation.[13] We built our survey sample of 3 groups: HCPs who disclosed  
40 only 2015 (group 1), only 2016 (group 2), and HCPs who disclosed both 2015 and 2016  
41 (group 3)<sup>1</sup>. To enhance the probability that we survey HCPs who receive payments annually,  
42 we excluded HCPs who disclosed an annual payment sum < 1,000 €. This was based on the  
43 observation that the median disclosed annual payments of HCPs who disclosed in both  
44 years was 899€ in 2015, compared to the median disclosed sum of HCPs who disclosed  
45 only once, which was 452€.[13] Based on that, we excluded 19,267 HCPs with annual  
46 payment sums < 1,000 €. From the remaining 8,963 HCPs, possible participants were  
47 selected (see below). Further, we only included HCPs who worked as physicians at the time  
48 point of the survey. This criterion was evaluated after selection: for each chosen HCP, we  
49 verified by internet research whether they currently worked as a physician. If they did not or  
50  
51  
52  
53  
54  
55  
56  
57

---

58  
59 <sup>1</sup> For further analyses in the underlying dissertation,[29] the third group was split up and analysed in three  
60 subgroups. Therefore, group 3 is bigger than groups 1 and 2.

1  
2  
3 no information was available, another HCP was randomly selected, and it was checked  
4 whether they worked as physicians. This was repeated until the determined sample size was  
5 reached.  
6  
7  
8

## 9 **Procedure and sample size**

10  
11 For the planned regression model, an analysable sample of 150 participants was  
12 estimated based on Green's rule of thumb.[30] Expecting a response rate of 30-50%, we  
13 formulated a detailed sample plan: Starting in August 2018, we sent out questionnaires in  
14 waves of 50 questionnaires per group. Questionnaires were sent by mail, accompanied by a  
15 cover letter and a reply envelope. A reminder letter was sent after two weeks. Two weeks  
16 after that, we phoned those with a publicly available phone number. If the planned sample  
17 size was not reached a month after the last contact attempt, the next wave was started: The  
18 next 50 physicians were randomly selected and contacted as described above. We stopped  
19 this procedure for each group after the 30th questionnaire was received, which was after we  
20 had sent the third wave of questionnaires in February 2019. All examinable questionnaires  
21 that we received afterwards were also included in the data analysis. Study procedures were  
22 preregistered at [www.osf.io/ztvur](http://www.osf.io/ztvur).  
23  
24  
25  
26  
27  
28  
29  
30  
31

## 32 **Questionnaire**

33  
34 The two-page questionnaire contains questions about demographics, disclosure, and  
35 attitude towards transparency in German language. Response formats include five-level  
36 Likert items, default categories, and open formats. Responses were given by ticking boxes  
37 or writing text onto the questionnaire. It was clarified in the cover letter that sending back  
38 completed questionnaires implies that data will be analysed anonymously. All items and  
39 response options can be found in Supplement A.  
40  
41  
42  
43  
44

## 45 **Main outcomes**

46  
47 The items to investigate research questions 1–3 are listed in Table 1. Physicians  
48 were asked about the frequency, content, and pleasantness of reactions that they  
49 experienced. Those questions could be answered separately for the reactions of patients,  
50 colleagues, and the private environment. For the analyses of the main research questions,  
51 an average value was calculated across the three groups of people. Participants of group 2  
52 were asked about reactions to their disclosure 2016; all other participants were asked about  
53 reactions to their disclosure 2015.  
54  
55  
56  
57  
58  
59  
60

**Table 1.***Translated List of Relevant Questionnaire Items With Response Format*

| Variable                   | Item<br>Response format                                                                                                                                                         |
|----------------------------|---------------------------------------------------------------------------------------------------------------------------------------------------------------------------------|
| <b>Research question 1</b> |                                                                                                                                                                                 |
| Pleasantness of reactions  | “If there were reactions, how did you perceive them?”<br><i>1-5: very unpleasant, rather unpleasant, neutral, rather pleasant, very pleasant</i>                                |
| Descriptive norm           | “What percentage of German physicians do you estimate consented to disclose in the database?”<br><i>___ % (open format in percent)</i>                                          |
| Attitude                   | “To what extent do you agree with the following statement: In principle, I approve of transparency.”<br><i>1-5: strongly disagree, disagree, neutral, agree, strongly agree</i> |
| <b>Research question 2</b> |                                                                                                                                                                                 |
| Frequency of reactions     | “How many reactions did you get from patients / colleagues / your private environment?”<br><i>1-5: none, very few, rather few, rather many, many</i>                            |
| <b>Research question 3</b> |                                                                                                                                                                                 |
| Content of reactions       | “If there were reactions, how was their content?”<br><i>1-5: very negative, somewhat negative, neutral, somewhat positive, very positive</i>                                    |

*Note.* The original questionnaire was in German; the translated complete questionnaire can be found in Supplement A.

## Analysis

To investigate hypothesis 1, a multiple logistic regression with the outcome variable disclosure 2016 (0 = no disclosure, 1 = disclosure) and the main predictors X1: pleasantness of reactions, and X2: descriptive norm was conducted. To investigate the moderating role of X3: attitude, two interaction terms were added as predictors: X3\*X1 and X3\*X2. To test hypothesis 2 and 3, the frequency and content of reactions 2015 were compared with the frequency and content of reactions 2016. Directed tests for independent samples were conducted (more frequent/more negative reactions in 2015 than 2016). To test for normal distribution, the Shapiro-Wilk test was used. Data in all groups were not normally distributed on the respective dependent variable, therefore Wilcoxon tests were conducted. Effect sizes with 95% CI are given as rank-biserial correlations ( $r_b$ ). A conservative alpha level of .01 was used for all tests.

Exploratively, we performed a content analysis[31] of answers to the question “Was there anything that bothered you about the reactions?”. All answers were reviewed by two researchers independently and categories were suggested. From the suggested categories, ten final categories were decided upon based on mutual consensus. Then, each answer was categorized independently (overall interrater agreement: 93%). Diverging ratings were discussed until consensus was reached. Statistical analyses were performed in JASP version 0.10.2,[32] RStudio, R version 3.6.1,[33] and Microsoft Excel (2011).

## Patient and public involvement

Patients and/or the public were not involved in the design, or conduct, or reporting, or dissemination plans of this research.

## RESULTS

### Sample

We contacted  $n = 750$  physicians and received 236 filled-in questionnaires (Figure 1). The response rate was 35% (236/678; 72 questionnaires were undeliverable). Two questionnaires needed to be excluded: one was missing a page and could not be allocated to a group; another contained a note that the participant was not a medical doctor but a biologist. The remaining 234 questionnaires were allocated to the groups and analysed. Mean and median age of participants was 53 years ( $SD = 8.29$ ;  $IQR = 10$ ; Range: 31-75;



1  
2  
3 48/234 (21%) female, 185/234 (79%) male, 1/234 (0%) missing). Further sample  
4 characteristics are listed in Supplement B.  
5  
6  
7

8 **- Insert Figure 1 about here -**  
9

### 10 11 12 13 **Physicians' experiences with the transparency database**

14  
15 Of the 234 participants, 87 (37%) stated they had not looked at the database, and 131 (56%)  
16 reported to have at least somewhat followed media coverage about the database. Most  
17 participants said they did not know whether their payments had been correctly reported: Of  
18 189 participants who agreed to disclose payments in 2015, 91 (48%) did not know; 70 (37%)  
19 said their payments had been correctly reported, and 24 (13%) said they had been  
20 incorrectly reported. Of 192 participants who agreed to disclose payments in 2016, 105  
21 (55%) did not know, 60 (31%) said their payments had been correctly reported and 23 (13%)  
22 said they had been incorrectly reported. Most participants stated they had not received any  
23 reactions from patients (190/234, 81%), colleagues (128/234, 55%) or the private  
24 environment (153/234, 65%). Response rates for items of content and pleasantness of  
25 reactions were between 26% (60/234, pleasantness of patients' reactions) and 48%  
26 (113/234, content of colleagues' reactions). See Figure 2 for detailed results.  
27  
28  
29  
30  
31  
32  
33  
34

35 **- insert Figure 2 about here -**  
36  
37  
38  
39

### 40 **Descriptive norm**

41  
42 For investigating how high participants estimated the percentage of German  
43 physicians who disclosed in the database in 2015 and 2016, data were available from 216  
44 and 218 participants and ranged between 0% and 100%. For 2015, participants estimated  
45 on average that 33% of German physicians had agreed to disclose ( $SD = 21$ ,  $Mdn = 30$ ,  
46  $IQR = 30$ ) and for 2016, participants estimated on average that 31% of German physicians  
47 agreed to disclose ( $SD = 20$ ,  $Mdn = 25$ ,  $IQR = 25$ ).  
48  
49  
50  
51

### 52 **Investigating non-disclosure**

53  
54 To answer research question 1, we investigated data of those participants who  
55 disclosed in 2015 (groups 1, 3;  $n = 189$ ) to predict whether they disclosed again in 2016  
56 (group 3;  $n = 147$ ) or did not disclose again in 2016 (group 1;  $n = 42$ ). Neither regression  
57 model 1 with the three predictor variables X1: pleasantness of reactions, X2: descriptive  
58  
59  
60

norm and X3: attitude significantly improved the model fit compared to the null model ( $\chi^2 = 1.0, p = .792$ ) nor regression model 2, in which the interaction terms X3\*X2 and X3\*X1 were added ( $\chi^2 = 12.66, p = .027$ ). A more detailed description of regression model 1 and 2 can be seen in Supplement C.

We additionally explored the reasons for participants' non-disclosure in general. In our sample, two groups did not disclose payments in one year: Participants of group 1 had an entry in 2015 but not in 2016 ( $n = 42$ ), and participants of group 2 had no entry in 2015 but in 2016 ( $n = 45$ ). We asked these participants for the reason for the missing entry (Table 2). The most frequently chosen reason in group 1 was that they had consciously decided against disclosure (50%, vs. 18% in group 2). The most frequently chosen answer in group 2 was that they were not asked for their consent to disclose (36%, vs. 7% in group 1). We further asked how several statements applied to the participants in case they consciously decided against disclosure. Most participants reported that considerations of public opinion or media reporting led to the decision against disclosure (25/32, 78%) (Figure 3).

**Table 2**  
*Reasons for Non-disclosure*

|                                                              | group 1                   | group 2                   |
|--------------------------------------------------------------|---------------------------|---------------------------|
| <b>You don't have an entry in the year 2015 (2016). Why?</b> | <b>abs. frequency (%)</b> | <b>abs. frequency (%)</b> |
| I have not received any payments.                            | 14/42 (33%)               | 10/45 (22%)               |
| I was not asked for my consent to disclose.                  | 3/42 (7%)                 | 16/45 (36%)               |
| I forgot to answer the inquiry for disclosure consent.       | 1/42 (2%)                 | 2/45 (4%)                 |
| I consciously decided against disclosure.                    | 21/42 (50%)               | 8/45 (18%)                |
| No reply                                                     | 3/42 (7%)                 | 9/45 (20%)                |

*Note.* Participants were asked to choose one of the four options. Group 1 = disclosure in 2015, but not in 2016; group 2 = no disclosure in 2015, but in 2016.

1  
2  
3 - insert Figure 3 about here -  
4  
5  
6  
7

## 8 Year of disclosure

9  
10 To investigate research questions 2 and 3, we compared the frequency and content  
11 of reactions to participants who disclosed for the first time in 2015 (groups 1, 3) with data of  
12 participants who disclosed for the first time in 2016 (group 2). Data for frequency of reactions  
13 were available for 2015 from 187/198 (99%) and for 2016 from 44/45 (98%) participants;  
14 data for content of reactions were available for 2015 from 110/198 (60%) and for 2016 from  
15 19/45 (42%) participants. All variables were significantly non-normal (all  $W = 0.71-0.90$ , all  $p$   
16  $<.01$ ). Testing hypothesis 2, we found no statistically significant difference between  
17 frequency of reactions 2015 and 2016 (2015:  $M = 1.54$ ,  $SD = 0.66$ ,  $Mdn = 1.33$ ,  $IQR = 1$ ; and  
18 2016:  $M = 1.36$ ,  $SD = 0.53$ ,  $Mdn = 1.00$ ,  $IQR = 0.67$ ), as evidenced by a Wilcoxon rank-sum  
19 test ( $W = 3410$ ,  $r_b = -.17$ , 95% CI  $[-\infty, -0.01]$ ,  $p = .031$ ). Testing hypothesis 3, we found no  
20 statistically significant difference between negativity of reactions 2015 and 2016 (2015:  $M =$   
21  $2.69$ ,  $SD = 0.71$ ,  $Mdn = 3.00$ ,  $IQR = 1$ ; and 2016:  $M = 2.96$ ,  $SD = 0.67$ ,  $Mdn = 3.00$ ,  $IQR =$   
22  $0.33$ ), as indicated by a Wilcoxon rank-sum test ( $W = 1243$ ,  $r_b = .19$ ; 95% CI  $[-0.05, \infty]$ ,  $p =$   
23  $.085$ ).  
24  
25  
26  
27  
28  
29  
30  
31  
32  
33  
34

## 35 Further exploratory investigations

36  
37 Participants were asked to indicate their agreement with statements about attitude  
38 towards disclosure in general and in research. The statements that participants agreed with  
39 most strongly were that disclosure of payments should be more nuanced, that the  
40 undifferentiated display of the disclosures brings science into disrepute and that disclosure  
41 leads to a wrong impression in the public (Table 3).  
42  
43  
44  
45  
46  
47  
48  
49  
50  
51  
52  
53  
54  
55  
56  
57  
58  
59  
60

**Table 3***Attitudes towards Transparency.*

|                                                                                                                          | <i>n</i> | Strongly disagree | Disagree        | Neutral         | Agree           | Strongly agree   |
|--------------------------------------------------------------------------------------------------------------------------|----------|-------------------|-----------------|-----------------|-----------------|------------------|
| Payments by pharmaceutical companies are a risk for the independence of clinical practice and research.                  | 233      | 26/233<br>(11%)   | 41/233<br>(18%) | 35/233<br>(15%) | 90/233<br>(39%) | 41/233<br>(18%)  |
| In principle, I approve of transparency.                                                                                 | 233      | 4/233<br>(2%)     | 3/233<br>(1%)   | 16/233<br>(7%)  | 39/233<br>(17%) | 171/233<br>(73%) |
| Collaboration with pharmaceutical companies and receiving payments by those companies is part of the medical profession. | 233      | 19/230<br>(8%)    | 35/230<br>(15%) | 66/230<br>(28%) | 71/230<br>(31%) | 39/230<br>(17%)  |
| Disclosure of payments should be more nuanced.                                                                           | 233      | 8/233<br>(3%)     | 2/233<br>(3%)   | 43/233<br>(18%) | 51/233<br>(22%) | 124/230<br>(53%) |
| Disclosure of payments increases patients' trust in me.                                                                  | 230      | 72/233<br>(31%)   | 45/233<br>(19%) | 75/233<br>(32%) | 32/233<br>(14%) | 9/233<br>(4%)    |
| Disclosure leads to a wrong impression in the public.                                                                    | 233      | 9/233<br>(4%)     | 24/233<br>(10%) | 31/233<br>(13%) | 78/233<br>(33%) | 91/233<br>(39%)  |
| In case you are working in research:                                                                                     |          |                   |                 |                 |                 |                  |
| Transparency guidelines impede my scientific work.                                                                       | 154      | 45/154<br>(29%)   | 40/154<br>(26%) | 29/154<br>(19%) | 32/154<br>(21%) | 8/154<br>(5%)    |
| I have been confronted with disclosures within the context of a published study at least once.                           | 154      | 56/154<br>(36%)   | 17/154<br>(11%) | 22/154<br>(14%) | 24/154<br>(16%) | 35/154<br>(23%)  |
| My research results were criticized because of my disclosures at least once.                                             | 152      | 119/152<br>(78%)  | 11/152<br>(7%)  | 13/152<br>(9%)  | 5/152<br>(3%)   | 4/152<br>(3%)    |
| The undifferentiated displaying of the disclosures brings science into disrepute.                                        | 155      | 10/155<br>(6%)    | 5/155<br>(3%)   | 16/155<br>(10%) | 37/155<br>(24%) | 87/155<br>(56%)  |

Sixty-eight participants answered the question “Was there anything that bothered you about the reactions?”. The content categories with respective frequencies are:

- negative media reporting (20/68, 29%)
- defamation / criminalization (17/68, 25%)
- unknown cases of undisclosed information (12/68, 18%)
- disclosed information is not put into context with services rendered in return (12/68, 18%)
- misleading data representation (7/68, 10%)
- contacted by lawyer who aimed a class action against CORRECTIV (7/68, 10%)
- feeling of being dragged into the public eye (5/68, 7%)
- feeling of being treated unfairly (5/68, 7%)
- involvement of employer (4/68, 6%)
- others expressed lack of understanding (2/68, 3%).

## DISCUSSION

### Principal findings

The aim of this study was to gain insight into physicians’ attitudes towards and experiences with the voluntary German transparency regulation. Research question 1 aimed to investigate how these experiences affect future disclosure behaviour, but no significant prediction model was found. Research questions 2 and 3 aimed to investigate whether reactions to disclosures between the first and the second year of the database differed. No significant difference in the frequency or content reactions was found on the alpha level of .01, which might be related to the fact that most participants in our sample had not received any reactions towards their disclosure. The fewest reactions came from patients. Only every fifth physician stated they had received at least “very few” reactions by patients.

We observed that the reasons for non-disclosure in our sample differed depending on the time point of non-disclosure: Participants who had disclosed in the first but not in the second year more often said they had consciously decided against disclosure than those who had not disclosed in the first year but in the second year. The latter more often said that they had not been asked for consent by the respective pharmaceutical company. Most physicians who had consciously decided against disclosure said it was because of public opinion and media reporting. We also found that nearly half of the participating physicians had not looked at the database and did not know whether their disclosed payment sum was correct. However, more than half of them at least somewhat followed the media coverage

1  
2  
3 about the database and some reported high objections to public exposure. This can be  
4 interpreted according to the spotlight effect which describes that people overestimate the  
5 attention they receive by others.[16] Several participants stated concerns about the public  
6 opinion and a feeling about being denounced, which is in line with the observation that  
7 physicians are concerned that COI disclosure may damage their reputation.[17] This  
8 tendency relates to the psychological heuristic that people do not like to be viewed as  
9 biased. Studies show that if people are able to avoid COI, they may be motivated to avoid  
10 such conflicts so that they can disclose the absence of conflicts.[34] In case of voluntary  
11 disclosure, however, people can simply avoid being viewed as biased by deciding against  
12 disclosure.  
13  
14  
15  
16  
17  
18  
19

## 20 **Strengths and weaknesses**

21  
22 The strength of this study is that it provides quantitative and qualitative data on  
23 physicians' experiences with COI disclosure in a national database. To our knowledge, no  
24 such evidence exists for any European transparency regulation in medicine. The  
25 investigated sample was stratified to their disclosing behaviour. Due to the otherwise random  
26 selection of participants, our sample comprises a great bandwidth of age, disciplines, and  
27 workplaces. The study, however, also has several limitations. A common problem in survey  
28 methods, answers may be skewed by social desirability.[35] The answers to a  
29 controversially discussed subject may be even more skewed: Physicians may be more  
30 motivated to respond to the survey if they have strong opinions on transparency, or if they  
31 experienced extreme reactions towards their disclosure. We tried to counter this by our  
32 efforts to increase the response rate. Additionally, the questionnaire we used was only  
33 constructed for this study, so our data cannot be directly compared to other data.  
34  
35  
36  
37  
38  
39  
40  
41  
42

## 43 **Meaning of the study**

44  
45 Physicians in our sample reported to be concerned about reputational damage and  
46 public exposure. Those who did not disclose payments had various reasons. Mandatory  
47 transparency could approach these issues: Firstly, if disclosure is mandatory, it will no longer  
48 feel "unfair" that some disclose information and some hide this information. Secondly, if  
49 conducted in a standardized form, everyone's information is available, and therefore the  
50 disclosed information is easier to compare and better to interpret, which will lessen the risk  
51 of unfair reputational damage and might enable a fair discussion between pharmaceutical  
52 companies, physicians, researchers, and the public.  
53  
54  
55  
56  
57

58  
59 Currently, the consent rate to disclose payments by pharmaceutical companies in  
60 Germany is low, compared to other countries.[12,13] In our study we observed that even if

1  
2  
3 physicians consented to disclosure, our participants mainly appear not to have used the  
4 database nor checked their entries. Therefore, we propose that disclosers need to be  
5 educated about the background of transparency regulations and the concept of COI to raise  
6 commitment.  
7  
8  
9

10  
11 For the management of financial COI in medicine, transparency is by now seen as a  
12 necessary, but not sufficient, measure.[7,10,36] Managing the influence of COI involves  
13 further higher action, e.g. people with relevant COI being excluded from guideline  
14 development groups.[1,36] Voluntary transparency regulations do not serve this aim. They  
15 may fuel discussion and raise awareness for the interaction of pharmaceutical companies  
16 with HCPs, however this may backfire if information is not contextualized, and the regulation  
17 is not driven forward.  
18  
19  
20  
21  
22

### 23 **Unanswered questions and future research**

24  
25 In this sample, reasons for non-disclosure were heterogeneous. More research is  
26 needed about the motives for and against voluntary disclosure to improve current  
27 transparency policies. Our data show that there are more issues that need to be considered  
28 about the experiences with transparency guidelines, such as the fear of reputational  
29 damage. Broad evaluations of transparency guidelines including all involved persons are  
30 needed to get a full picture of the current situation.  
31  
32  
33  
34  
35  
36

### 37 **CONCLUSION**

38  
39 The study at hand was the first survey of physicians who disclosed voluntarily in a  
40 nation-wide transparency database. We found no significant predictors for future disclosure  
41 behaviour and no statistically significant difference in the reactions to disclosures between  
42 the first year and the second year of the database. The exploratory results of this study show  
43 preliminary evidence that although German HCPs experienced only few reactions by  
44 patients, colleagues or in private, they are concerned that disclosing payments in a public  
45 database will result in reputational damage. Considering public opinion and media exposure  
46 was the most frequent reason for non-disclosure in this subsample. We propose that  
47 mandatory disclosure could be a solution to this problem by creating a standardized  
48 environment for an open discussion.  
49  
50  
51  
52  
53  
54  
55  
56  
57  
58  
59  
60

## Acknowledgements

We thank CORRECTIV for providing the database. Many thanks also to Jasmin Peifer and Marc Himmelmann for their help with the database and the paper questionnaire, and to Alexander Mancini for discussing the free answers.

**Contributorship Statement:** MS, CK, KL and BE were responsible for the study conception and design. MS, KL and BE were responsible for title and abstract and full-text review. MS and LH were responsible for data extraction and validation. MS, CK and BE analysed and interpreted results. MS drafted the manuscript. All authors provided a critical review and approved the final manuscript. MS is the guarantor.

**Funding:** Funded by Volkswagen Foundation (grant no. A118085 (ref.91498) to KL).

**Competing Interests:** CK, MS and LH declared that they had received salary from the Volkswagen Foundation to conduct the project. KL declared that he had received a research grant from the Volkswagen Foundation to conduct the project. BE declared that he has no conflict of interest.

**Patient consent for publication:** not required.

**Provenance and peer review:** -

**Data sharing statement:** Data are available on reasonable request by emailing MS.

**Note:** This paper contains extended passages from the dissertation by Marlene Stoll [24].

**Ethics statement:** The ethics committee of the Landesärztekammer Rheinland-Palatinate decided that a further consultation is not necessary since no personal but only anonymous data were processed (2018-13295-Epidemiologie).



## REFERENCES

1. Institute of Medicine Committee on Conflict of Interest in Medical Research. The National Academies Collection: Reports funded by National Institutes of Health. In: Lo B, Field B, eds. Conflict of interest in medical research, education, and practice. Washington (DC): National Academies Press; 2009.
2. Chimonas S, Mammor M, Zimbalist S, Barrow B, Bach PB, Korenstein D. BMJ. 2021 Nov 3; 375:e066576
3. Lundh A, Lexchin J, Mintzes B, et al. Industry sponsorship and research outcome: systematic review with meta-analysis. *Intensive Care Med.* 2018 Oct 1;44(10):1603–12 <https://doi.org/10.1007/s00134-018-5293-7>.
4. Mitchell AP, Trivedi NU, Gennarelli RL, et al. Are Financial Payments From the Pharmaceutical Industry Associated With Physician Prescribing? *Ann Intern Med.* 2021 Mar 16;174(3):353–61 <https://doi.org/10.7326/M20-5665>.
5. Nejstgaard CH, Bero L, Hróbjartsson A, et al. Association between conflicts of interest and favourable recommendations in clinical guidelines, advisory committee reports, opinion pieces, and narrative reviews: systematic review. *BMJ.* 2020 Dec 9;371:m4234 <https://doi.org/10.1136/bmj.m4234>.
6. Thompson D. Understanding financial conflicts of interest. *N Engl J Med.* 1993.
7. Fabbri A, Santos A, Mezinska S, et al. Sunshine Policies and Murky Shadows in Europe: Disclosure of Pharmaceutical Industry Payments to Health Professionals in Nine European Countries. *Int J Health Policy Manag.* 2018 Mar 14;7(6):504–9 <https://doi.org/10.15171/ijhpm.2018.20>.
8. Grundy Q, Habibi R, Shnier A, et al. Decoding disclosure: Comparing conflict of interest policy among the United States, France, and Australia. *Health Policy.* 2018 May 1;122(5):509–18 <https://doi.org/10.1016/j.healthpol.2018.03.015>.
9. Europe M-MH. Shedding Light on Transparent Cooperation in Healthcare. The way forward for sunshine and transparency laws across Europe, 2020. Available: <https://mhe-sme.org/wp-content/uploads/2019/01/MHE-SHEDDING-LIGHT-REPORT-Final.pdf>
10. Bradley SH, DeVito NJ, Lloyd K, Richards GC, Rombey T, Wayant C, Gill PJ. Reducing bias and improving transparency in medical research: a critical overview of the problems, progress and suggested next steps. *J R Soc Med.* 2020 Nov 1;113(11):433–443. <https://doi.org/10.1177/0141076820956799>
11. Open Payments [Website]. Available from: <https://www.cms.gov/openpayments> (accessed 19 Nov 2021).
12. Mulinari S, Martinon L, Jachiet P-A, et al. Pharmaceutical industry self-regulation and non-transparency: country and company level analysis of payments to healthcare professionals in seven European countries. *Health Policy.* 2021 Jul 1;125(7):915–22 <https://doi.org/10.1016/j.healthpol.2021.04.015>.
13. Stoll M, Hubenschmid L, Koch C, et al. Voluntary disclosures of payments from pharmaceutical companies to healthcare professionals in Germany: a descriptive

- 1  
2  
3 study of disclosures in 2015 and 2016. *BMJ Open*. 2020 Sep 1;10(9):e037395  
4 <http://dx.doi.org/10.1136/bmjopen-2020-037395>.  
5
- 6 14. Loewenstein G, Sah S, Cain DM. The Unintended Consequences of Conflict of  
7 Interest Disclosure. *JAMA*. 2012 Feb 15;307(7):669–70  
8 <https://doi.org/10.1001/jama.2012.154>.  
9
- 10 15. Sah S, Loewenstein G, Cain DM. Insinuation Anxiety: Concern That Advice Rejection  
11 Will Signal Distrust After Conflict of Interest Disclosures. *Pers Soc Psychol Bull*.  
12 2019;45(7);1099–1112 <https://doi.org/10.1177/0146167218805991>.  
13
- 14 16. Loewenstein G, Sunstein CR, Golman R. Disclosure: Psychology Changes  
15 Everything. *Annu Rev Econ*. 2014;6:391–419 [https://doi.org/10.1146/annurev-](https://doi.org/10.1146/annurev-economics-080213-041341)  
16 [economics-080213-041341](https://doi.org/10.1146/annurev-economics-080213-041341).  
17
- 18 17. Chimonas S, DeVito NJ, Rothman DJ. Bringing Transparency to Medicine: Exploring  
19 Physicians' Views and Experiences of the Sunshine Act. *Am J Bioeth*. 2017 Jun  
20 3;17(6):4–18 <https://doi.org/10.1080/15265161.2017.1313334>.  
21
- 22 18. Boytchev WB. Warum Ärzte schweigen. 2016 Jul 17; Available from:  
23 <https://correctiv.org/aktuelles/euros-fuer-aerzte/2016/07/17/warum-aerzte-schweigen>  
24 (accessed 19 Nov 2021).  
25
- 26 19. Licurse A, Barber E, Joffe S, Gross C. The impact of disclosing financial ties in  
27 research and clinical care: a systematic review. *Arch Intern Med*. 2010;170(8):675-  
28 82. <https://doi.org/10.1001/archinternmed.2010.39>  
29
- 30 20. Riedl EM, König J, Koch C, Lieb K. Einstellungen und Erwartungen von Patienten in  
31 Bezug auf Interessenkonflikte ihrer behandelnden Ärzte. *Z Evid Fortbild Qual*  
32 *Gesundheitswes*. 2016 Jan 1;110-111;45-53  
33 <https://doi.org/10.1016/j.zefq.2015.12.002>.  
34
- 35 21. Pham-Kanter G, Mello MM, Lehmann LS, et al. Public Awareness of and Contact  
36 With Physicians Who Receive Industry Payments: A National Survey. *J Gen Intern*  
37 *Med*. 2017 Jul 1;32(7):767–74 <http://dx.doi.org/10.1007/s11606-017-4012-3>.  
38
- 39 22. Young PD, Xie D, Schmidt H. Towards Patient-Centered Conflicts of Interest Policy.  
40 *Int J Health Policy Manag*. 2017 Oct 29;7(2):112–9  
41 <https://dx.doi.org/10.15171%2Fijhpm.2017.128>.  
42
- 43 23. Chung A, Rimal RN. Social norms: a review. *Rev Commun Res*. 2016;4:1–28  
44 <https://doi.org/10.12840/issn.2255-4165.2016.04.01.008>.  
45
- 46 24. Lapinski MK, Rimal RN. An Explication of Social Norms. *Commun Theory*. 2005 May  
47 1;15(2):127–47 <https://doi.org/10.1111/j.1468-2885.2005.tb00329.x>.  
48
- 49 25. Freiwillig Selbstkontrolle für die Arzneimittelindustrie e.V. FSA-Transparenzkodex.  
50 2019. Available from: [https://www.fsa-](https://www.fsa-pharma.de/de/kodizes/sk_fsa_transparenzkodex_13.03.2019.pdf)  
51 [pharma.de/de/kodizes/sk\\_fsa\\_transparenzkodex\\_13.03.2019.pdf](https://www.fsa-pharma.de/de/kodizes/sk_fsa_transparenzkodex_13.03.2019.pdf) (accessed 19 Nov  
52 2021).  
53
- 54 26. Richter, F. "Euros für Ärzte"-Datenbank beendet. 2021 Jan 14; Available from:  
55 <https://correctiv.org/aktuelles/2021/01/14/euros-fuer-aerzte-datenbank-beendet/>  
56 (accessed 19 November 2021).  
57  
58  
59  
60

- 1  
2  
3 27. CORRECTIV. Euros für Ärzte. 2021. Available from:  
4 <https://correctiv.org/aktuelles/euros-fuer-aerzte> (accessed 19 November 2021).  
5  
6 28. Elmer C, Stotz P. Warum Ärzte schweigen. 2016 Jul 14; Available from:  
7 [https://www.spiegel.de/gesundheit/diagnose/euros-fuer-aerzte-datenbank-wie-viel-](https://www.spiegel.de/gesundheit/diagnose/euros-fuer-aerzte-datenbank-wie-viel-hat-mein-arzt-bekommen-a-1102819.html)  
8 [hat-mein-arzt-bekommen-a-1102819.html](https://www.spiegel.de/gesundheit/diagnose/euros-fuer-aerzte-datenbank-wie-viel-hat-mein-arzt-bekommen-a-1102819.html) (accessed 19 November 2021).  
9  
10 29. Stoll M. Unintended Consequences of Conflict of Interest Disclosure: a Psychological  
11 Perspective [Internet]. Johannes Gutenberg-Universität Mainz; 2021 [cited 2021 Jul  
12 28]. Available from: <https://openscience.ub.uni-mainz.de/handle/20.500.12030/5731>  
13  
14 30. Green SB. How Many Subjects Does It Take To Do A Regression Analysis. *Multivar*  
15 *Behav Res.* 1991 Jul 1;26(3):499–510 [https://doi.org/10.1207/s15327906mbr2603\\_7](https://doi.org/10.1207/s15327906mbr2603_7).  
16  
17 31. Mayring P. Qualitative content analysis: theoretical foundation, basic procedures and  
18 software solutions [Internet]. Social Science Open Access Repository; 2014 [cited  
19 2021 Nov 19]. Available from: [https://nbn-resolving.org/urn:nbn:de:0168-ssoar-](https://nbn-resolving.org/urn:nbn:de:0168-ssoar-395173)  
20 [395173](https://nbn-resolving.org/urn:nbn:de:0168-ssoar-395173)  
21  
22 32. JASP Team. JASP (Version 0.10.2). 2019.  
23  
24 33. R Core Team. R: A Language and Environment for Statistical Computing. 2019.  
25 Available from: <https://www.R-project.org>  
26  
27 34. Sah S, Loewenstein G. Nothing to Declare: Mandatory and Voluntary Disclosure  
28 Leads Advisors to Avoid Conflicts of Interest. *Psychol Sci.* 2014;25(2):575-584  
29 <https://doi.org/10.1177%2F0956797613511824>.  
30  
31 35. Barclay S, Todd C, Finlay I, et al. Not another questionnaire! Maximizing the  
32 response rate, predicting non-response and assessing non-response bias in postal  
33 questionnaire studies of GPs. *Fam Pract.* 2002 Feb 1;19(1):105–11  
34 <https://doi.org/10.1093/fampra/19.1.105>.  
35  
36 36. Lexchin J, Fugh-Berman A. A Ray of Sunshine: Transparency in Physician-Industry  
37 Relationships is not Enough. *J Gen Intern Med.* 2021 Oct 1;36(10):3194-3198  
38 <https://doi.org/10.1007/s11606-021-06657-0>  
39  
40  
41  
42  
43  
44  
45  
46  
47  
48  
49  
50  
51  
52  
53  
54  
55  
56  
57  
58  
59  
60

## Figures

Figure 1. Participant Flow Chart.

Figure 2. Relative Frequencies of Item Answers for Frequency, Content, and Pleasantness of Reactions from Recipients, N = 234.

Figure 3. Factors Considered for Decision Against Disclosure.

1  
2  
3  
4  
5  
6  
7  
8  
9  
10  
11  
12  
13  
14  
15  
16  
17  
18  
19  
20  
21  
22  
23  
24  
25  
26  
27  
28  
29  
30  
31  
32  
33  
34  
35  
36  
37  
38  
39  
40  
41  
42  
43  
44  
45  
46  
47  
48  
49  
50  
51  
52  
53  
54  
55  
56  
57  
58  
59  
60

For peer review only

1  
2  
3  
4  
5  
6  
7  
8  
9  
10  
11  
12  
13  
14  
15  
16  
17  
18  
19  
20  
21  
22  
23  
24  
25  
26  
27  
28  
29  
30

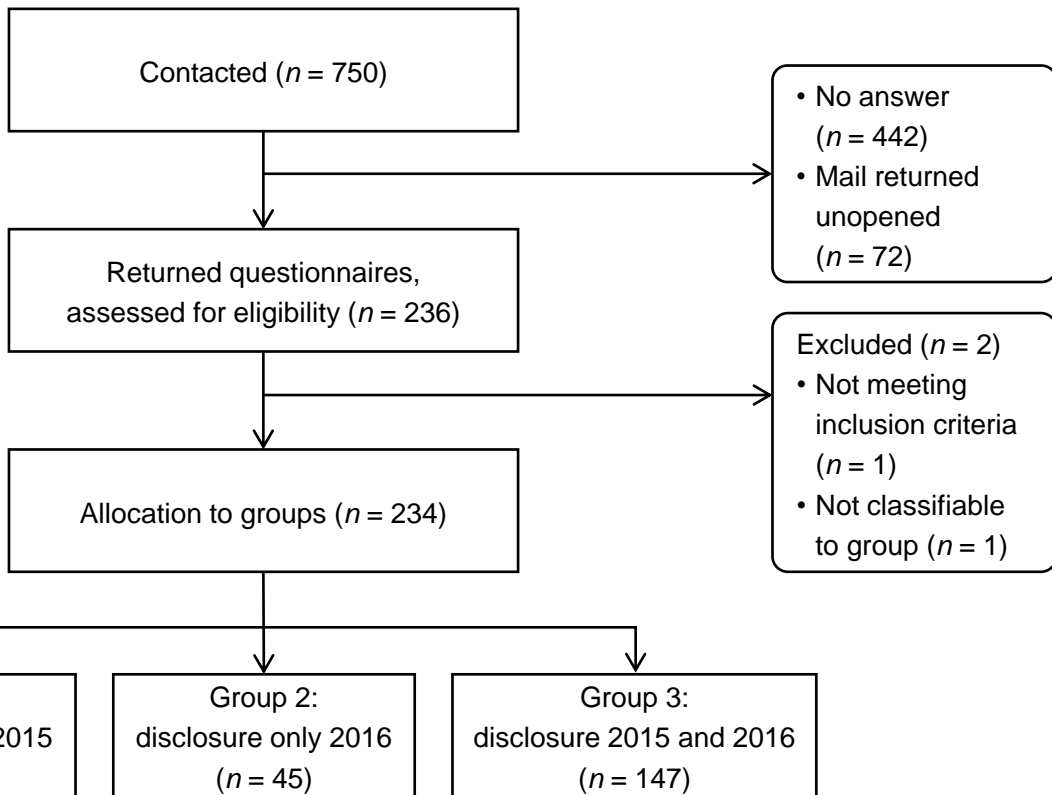

**Frequency of Reactions**



|             | Private Environment | Colleagues | Patients |
|-------------|---------------------|------------|----------|
| none        | 65%                 | 55%        | 81%      |
| very few    | 15%                 | 23%        | 13%      |
| rather few  | 12%                 | 14%        | 4%       |
| rather many | 5%                  | 6%         | 1%       |
| many        | 0%                  | 0%         | 0%       |
| NA          | 2%                  | 2%         | 1%       |

**Content of Reactions**

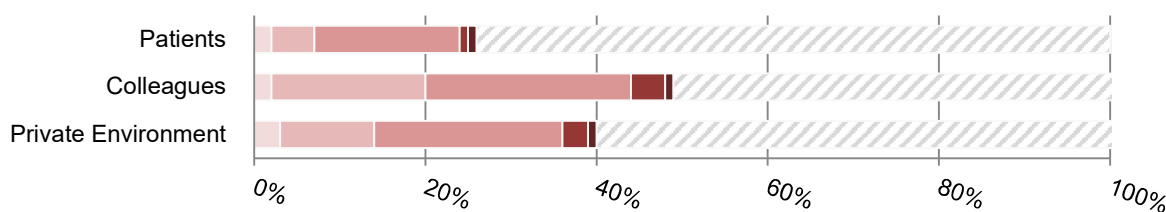

|               | Private Environment | Colleagues | Patients |
|---------------|---------------------|------------|----------|
| very negative | 3%                  | 2%         | 2%       |
| negative      | 11%                 | 18%        | 5%       |
| neutral       | 22%                 | 24%        | 17%      |
| positive      | 3%                  | 4%         | 1%       |
| very positive | 1%                  | 1%         | 1%       |
| NA            | 61%                 | 52%        | 74%      |

**Pleasantness of Reactions**

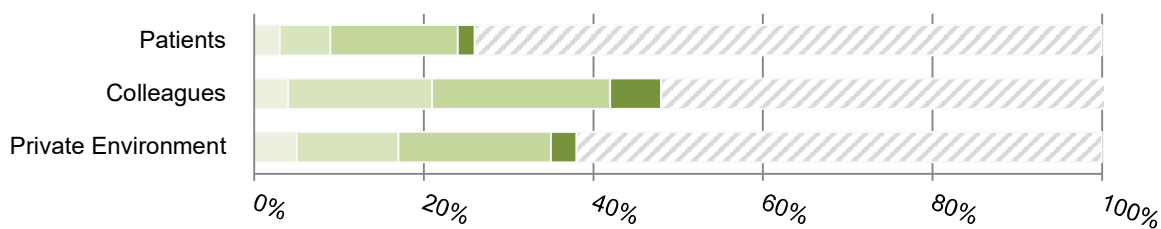

|                   | Private Environment | Colleagues | Patients |
|-------------------|---------------------|------------|----------|
| very unpleasant   | 5%                  | 4%         | 3%       |
| rather unpleasant | 12%                 | 17%        | 6%       |
| neutral           | 18%                 | 21%        | 15%      |
| rather pleasant   | 3%                  | 6%         | 2%       |
| very pleasant     | 0%                  | 0%         | 0%       |
| NA                | 62%                 | 53%        | 74%      |

1  
2  
3  
4  
5  
6  
7  
8  
9  
10  
11  
12  
13  
14  
15  
16  
17  
18  
19  
20  
21  
22  
23  
24  
25  
26  
27  
28  
29  
30  
31

**Which factors did you consider in your decision against disclosure?**



**Supplement A***Translated Questionnaire (not formatted)***1) Discipline:**

[open format]

**2) Gender:**

- male
- female

**3) Age:**

[open format]

**4) Do you work in a hospital?**

- yes, university hospital
- yes, non-university hospital
- no

**5) If yes: Which position do you have?**

- head
- senior
- resident

**6) If no: How do you work?**

- licensed
- employed
- other

**7) How much of your working hours (in %) do you spend on patient care?**

[open format]

**8) How much of your working hours (in %) do you spend on research?**

[open format]

**9) Please tick every box that resembles a research area that you have been actively working in in the last five years (multiple responses are possible).**

- non-interventional post-marketing studies
- clinical studies on behalf of pharmaceutical companies
- clinical studies investigated by yourself
- own, academical research
- other: \_\_\_\_\_
- I do not work in research.

**10) What percentage of German physicians do you estimate consented to disclose in the database?**

In 2016 for disclosure 2015: [open format]

In 2017 for disclosure 2016: [open format]



1  
2  
3 **11) Do you know the actual percentage approximately, for example from the media?**  
4

5 2016:

- 6  yes  
7  no  
8

9 2017:

- 10  yes  
11  no  
12  
13

14 **12) Have your information about payments been correctly reported in the database?**  
15 **“Euros for Doctors”?**  
16

17 [groups 1, 3-5] In 2017 for 2016:

- 18  yes  
19  no  
20  I don't know  
21

22  
23 [groups 2-5] In 2016 for 2015:

- 24  yes  
25  no  
26  I don't know  
27  
28

29 **13) In the summer of 2016, first data were disclosed in the database. How much do the**  
30 **following statements apply to you?**

- 31 - I looked into the database.  
32 - I followed media coverage about the database.  
33 - I searched for persons in the database.  
34

35 scale:

- 36  applies not at all  
37  applies less  
38  neutral  
39  applies a bit  
40  applies fully  
41  
42

43 **14) How high is the amount of money you disclosed, compared to the other disclosed**  
44 **payments?**

- 45  definitely below average  
46  somewhat below average  
47  average  
48  somewhat above average  
49  definitely above average  
50  
51  
52  
53  
54  
55  
56  
57  
58  
59  
60

1  
2  
3 **15. 1) [group 1, 3-5] You disclosed data in 2015. We are interested in how your**  
4 **environment reacted to this entry.**

5 **15.2) [group 2] You disclosed data in 2015. We are interested in how your environment**  
6 **reacted to this entry.**

7  
8  
9 **How many reactions did you get from ...**

- 10 - **patients?**
- 11 - **colleagues?**
- 12 - **your private environment?**

13  
14 **scale:**

- 15  none
- 16  very few
- 17  rather few
- 18  rather many
- 19  many

20  
21  
22  
23 **16) If there were reactions, how was their content? Reactions from ...**

- 24 - **patients**
- 25 - **colleagues**
- 26 - **your private environment**

27  
28 **scale:**

- 29  very negative
- 30  somewhat negative
- 31  neutral
- 32  somewhat positive
- 33  very positive

34  
35  
36 **17) If there were reactions, how did you perceive them? Reactions from ...**

- 37 - **patients**
- 38 - **colleagues**
- 39 - **your private environment**

40  
41 **scale:**

- 42  very unpleasant
- 43  rather unpleasant
- 44  neutral
- 45  rather pleasant
- 46  very pleasant

47  
48  
49 **18) Was there anything that bothered you about the reactions?**

50 [open format]

51  
52  
53  
54 **19.1) [group 1] You do not have an entry in the database in the year 2016. Why?**

55 **19.2) [group 2] You do not have an entry in the database in the year 2015. Why?**

- 56  I have not received any payments.
- 57  I was not asked for my consent to disclose.
- 58  I forgot to answer the inquiry for disclosure consent.
- 59  I consciously decided against disclosure.

1  
2  
3  
4 **20.1) [group 1] In case you decided consciously against disclosure: Which factors did**  
5 **you consider in your decision against disclosure?**  
6

- 7 - Others advised me not to disclose.
- 8 - Consideration of the public opinion / media reporting.
- 9 - Consideration of future reactions by patients.
- 10 - Consideration of future reactions by colleagues.
- 11 - Consideration of future reactions in the private surrounding.
- 12 - Negative experiences with disclosure 2015.

13  
14 scale:

- 15  applies not at all
- 16  applies less
- 17  neutral
- 18  applies a bit
- 19  applies fully

20  
21  
22  
23 **20.2) [group 2] In case you decided consciously against disclosure: Which factors did**  
24 **you consider in your decision against disclosure?**

- 25 - Others advised me not to disclose.
- 26 - Consideration of the public opinion / media reporting.
- 27 - Consideration of future reactions by patients.
- 28 - Consideration of future reactions by colleagues.
- 29 - Consideration of future reactions in the private surrounding.

30  
31 scale:

- 32  applies not at all
- 33  applies less
- 34  neutral
- 35  applies a bit
- 36  applies fully

37  
38  
39  
40 **20.3) [groups 3-5] In 2016, you decided to disclose a second time. Please state how**  
41 **much the following statements apply to you.**

- 42 - [groups 3-5] Coming to decision whether or not to disclose was easier for the second  
43 year than for the first year.
- 44 - [groups 4,5] My payments shifted because the opportunities by the pharmaceutical  
45 companies changed.
- 46 - [group 4] My payments shifted because I consciously accepted more money.
- 47 - [group 5] My payments shifted because I consciously accepted less money.

48  
49 scale:

- 50  applies not at all
- 51  applies less
- 52  neutral
- 53  applies a bit
- 54  applies fully

1  
2  
3 **21) To what extent do you agree with the following statements:**

- 4 - Payments by pharmaceutical companies are a risk for the independence of clinical  
5 practice and research.  
6  
7 - Disclosure of payments increases patients' trust in me.  
8  
9 - Receiving payments is fine if regulation measures (disclosure, exclusion from  
10 committees) are adopted.  
11  
12 - In principle, I approve of transparency.  
13  
14 - Disclosure leads to a wrong impression in the public.  
15  
16 - Collaboration with pharmaceutical companies and receiving payments by those  
17 companies is part of the medical profession.  
18  
19 - Some payments should be avoided, while others are indispensable.  
20  
21 - Without good alternatives in research and training, nothing about financial  
22 interactions in the medical sector will change.  
23  
24 - Disclosure of payments should be more nuanced.

25 In case you are working in research:

- 26 - Transparency guidelines impede my scientific work.  
27  
28 - I have been confronted with disclosures within the context of a published study at  
29 least once.  
30  
31 - My research results were criticized because of my disclosures at least once.  
32  
33 - If I do not cooperate with the industry, the research that is relevant for me lacks  
34 financial resources.  
35  
36 - The undifferentiated displaying of the disclosures brings science into disrepute.

37 scale:

- 38  strongly disagree  
39  disagree  
40  neutral  
41  agree  
42  strongly agree

43 **22) In your opinion: Disclosure of financial payments is more important in which  
44 area?**

- 45  definitely in patient care  
46  rather in patient care  
47  equally important  
48  rather in research  
49  definitely in research  
50  
51  
52  
53  
54  
55  
56  
57  
58  
59  
60

## Supplement B

### Sample Characteristics

| Characteristic | <i>n</i>                                 | %   |    |
|----------------|------------------------------------------|-----|----|
| Gender         | Female                                   | 48  | 21 |
|                | Male                                     | 185 | 79 |
|                | NA                                       | 1   | 0  |
| Field          | General and internal medicine            | 129 | 55 |
|                | Psychiatry, neurology and psychosomatics | 33  | 14 |
|                | Surgery                                  | 31  | 13 |
|                | Other                                    | 38  | 16 |
| Workplace      | University hospital                      | 67  | 29 |
|                | Non-university hospital                  | 51  | 22 |
|                | <i>Of which position: Head</i>           | 49  | 42 |
|                | <i>Senior</i>                            | 53  | 19 |
|                | <i>Resident</i>                          | 11  | 9  |
|                | NA                                       | 5   | 4  |
|                | Practice                                 | 113 | 48 |
|                | <i>Of which: Licensed</i>                | 104 | 92 |
|                | <i>Employed</i>                          | 9   | 8  |
|                | NA                                       | 3   | 1  |

Note. N= 234

## Supplement C

### *Investigating non-disclosure, regression analysis.*

To answer the first research question, we investigated data of those participants who disclosed in 2015 ( $n = 189$ ) to predict whether they disclosed again in 2016 ( $n = 147$ , 78%) or did not disclose again in 2016 ( $n = 42$ , 22%). Response rate per item differed: For the items attitude, descriptive norm 2015, and pleasantness of reactions 2015, data were available from 188, 174, and 107 participants, respectively. For pleasantness of reactions 2015, we thus only had data of 22 people who did not disclose in 2016. All variables were significantly non-normal: all  $W = 0.52 - 0.92$ , all  $p < .01$ .

In regression model 1, the predictors were the three variables X1: pleasantness of reactions, X2: descriptive norm and X3: attitude. This model did not significantly improve the model fit compared to the null model,  $\chi^2 = 1.0$ ,  $p = .792$ . Regression model 2 included the three variables as well as the interaction terms X3\*X2 as well as X3\*X1. This second model also did not significantly improve the model fit compared to the null model,  $\chi^2 = 12.66$ ,  $p = .027$ . Effect sizes, pseudo- $R^2$ -values and variance inflation factors (*VIF*) of regression model 1 and 2 can be seen in Table C1. The pseudo- $R^2$ -values, being very low, indicate that this prediction model is of poor quality. We further explored the data by investigating whether participants who disclosed in 2016 had systematically different values on the main outcomes from the participants who did not disclose in 2016. Results from the performed Wilcoxon tests provided no indication for systematic differences between the groups (all  $p < .01$ ).

**Table C1***Logistic Regression Coefficients and Effect Sizes of Regression Model 1 and 2*

|                                                        | <i>B (SE)</i> | <i>p</i> | <i>OR</i> |
|--------------------------------------------------------|---------------|----------|-----------|
| Regression model 1: Only main effects                  |               |          |           |
| Intercept                                              | 1.54 (0.28)   | .000     | 4.66      |
| Pleasantness of reactions                              | 0.24 (0.27)   | .373     | 1.27      |
| Descriptive norm                                       | 0.13 (0.37)   | .717     | 1.14      |
| Attitude                                               | -0.10 (0.32)  | .753     | 0.90      |
| Regression model 2: Main effects and interaction terms |               |          |           |
| Intercept                                              | 2.31 (0.60)   | .000     | 10.11     |
| Pleasantness of reactions                              | 0.61 (0.42)   | .142     | 1.84      |
| Descriptive norm                                       | -0.06 (0.46)  | .891     | 0.94      |
| Attitude                                               | -1.57 (1.08)  | .145     | 0.21      |
| Attitude*pleasantness of reactions                     | -1.27 (0.64)  | .048     | 0.28      |
| Attitude*descriptive norm                              | 0.98 (0.67)   | .140     | 2.67      |

*Note.* Model fit regression model 1:  $R^2 = .01$  (Hosmer-Lemeshow), .01 (Cox-Snell), .02 (Nagelkerke); model 1 compared to null model:  $\chi^2(3) = 1.04$ ,  $p = .792$ , all  $VIF < 10$ ; Model fit regression model 2:  $R^2 = .01$  (Hosmer-Lemeshow), .01 (Cox-Snell), .02 (Nagelkerke); model 2 compared to null model:  $\chi^2(5) = 12.66$ ,  $p = .027$ ; model 2 compared to model 1:  $\chi^2(2) = 11.63$ ,  $p = .003$ , all  $VIF < 10$ .

**STROBE 2007 (v4) checklist of items to be included in reports of observational studies in epidemiology\***  
**Checklist for cohort, case-control, and cross-sectional studies (combined)**

| Section/Topic             | Item # | Recommendation                                                                                                                                                                                                                                                                                                                                                                                                                                                         | Reported on page # |
|---------------------------|--------|------------------------------------------------------------------------------------------------------------------------------------------------------------------------------------------------------------------------------------------------------------------------------------------------------------------------------------------------------------------------------------------------------------------------------------------------------------------------|--------------------|
| Title and abstract        | 1      | (a) Indicate the study's design with a commonly used term in the title or the abstract                                                                                                                                                                                                                                                                                                                                                                                 | 1                  |
|                           |        | (b) Provide in the abstract an informative and balanced summary of what was done and what was found                                                                                                                                                                                                                                                                                                                                                                    | 2                  |
| <b>Introduction</b>       |        |                                                                                                                                                                                                                                                                                                                                                                                                                                                                        |                    |
| Background/rationale      | 2      | Explain the scientific background and rationale for the investigation being reported                                                                                                                                                                                                                                                                                                                                                                                   | 4-6                |
| Objectives                | 3      | State specific objectives, including any pre-specified hypotheses                                                                                                                                                                                                                                                                                                                                                                                                      | 7                  |
| <b>Methods</b>            |        |                                                                                                                                                                                                                                                                                                                                                                                                                                                                        |                    |
| Study design              | 4      | Present key elements of study design early in the paper                                                                                                                                                                                                                                                                                                                                                                                                                | 7-8                |
| Setting                   | 5      | Describe the setting, locations, and relevant dates, including periods of recruitment, exposure, follow-up, and data collection                                                                                                                                                                                                                                                                                                                                        | 7-9                |
| Participants              | 6      | (a) <i>Cohort study</i> —Give the eligibility criteria, and the sources and methods of selection of participants. Describe methods of follow-up<br><i>Case-control study</i> —Give the eligibility criteria, and the sources and methods of case ascertainment and control selection. Give the rationale for the choice of cases and controls<br><i>Cross-sectional study</i> —Give the eligibility criteria, and the sources and methods of selection of participants | 7-8                |
|                           |        | (b) <i>Cohort study</i> —For matched studies, give matching criteria and number of exposed and unexposed<br><i>Case-control study</i> —For matched studies, give matching criteria and the number of controls per case                                                                                                                                                                                                                                                 | NA                 |
| Variables                 | 7      | Clearly define all outcomes, exposures, predictors, potential confounders, and effect modifiers. Give diagnostic criteria, if applicable                                                                                                                                                                                                                                                                                                                               | 8-9                |
| Data sources/ measurement | 8*     | For each variable of interest, give sources of data and details of methods of assessment (measurement). Describe comparability of assessment methods if there is more than one group                                                                                                                                                                                                                                                                                   | 8-9, Supplement A  |
| Bias                      | 9      | Describe any efforts to address potential sources of bias                                                                                                                                                                                                                                                                                                                                                                                                              | 8                  |
| Study size                | 10     | Explain how the study size was arrived at                                                                                                                                                                                                                                                                                                                                                                                                                              | 8                  |
| Quantitative variables    | 11     | Explain how quantitative variables were handled in the analyses. If applicable, describe which groupings were chosen and why                                                                                                                                                                                                                                                                                                                                           | 8-10               |
| Statistical methods       | 12     | (a) Describe all statistical methods, including those used to control for confounding                                                                                                                                                                                                                                                                                                                                                                                  | 10                 |
|                           |        | (b) Describe any methods used to examine subgroups and interactions                                                                                                                                                                                                                                                                                                                                                                                                    | NA                 |
|                           |        | (c) Explain how missing data were addressed                                                                                                                                                                                                                                                                                                                                                                                                                            | NA                 |
|                           |        | (d) <i>Cohort study</i> —If applicable, explain how loss to follow-up was addressed<br><i>Case-control study</i> —If applicable, explain how matching of cases and controls was addressed                                                                                                                                                                                                                                                                              | 8                  |



|                          |     |                                                                                                                                                                                                              |                  |
|--------------------------|-----|--------------------------------------------------------------------------------------------------------------------------------------------------------------------------------------------------------------|------------------|
|                          |     | <i>Cross-sectional study</i> —If applicable, describe analytical methods taking account of sampling strategy                                                                                                 |                  |
|                          |     | (e) Describe any sensitivity analyses                                                                                                                                                                        |                  |
| <b>Results</b>           |     |                                                                                                                                                                                                              |                  |
| Participants             | 13* | (a) Report numbers of individuals at each stage of study—eg numbers potentially eligible, examined for eligibility, confirmed eligible, included in the study, completing follow-up, and analysed            | 7, 10            |
|                          |     | (b) Give reasons for non-participation at each stage                                                                                                                                                         | 10               |
|                          |     | (c) Consider use of a flow diagram                                                                                                                                                                           | Figure 1         |
| Descriptive data         | 14* | (a) Give characteristics of study participants (eg demographic, clinical, social) and information on exposures and potential confounders                                                                     | 10, Supplement B |
|                          |     | (b) Indicate number of participants with missing data for each variable of interest                                                                                                                          | 10-14            |
|                          |     | (c) <i>Cohort study</i> —Summarise follow-up time (eg, average and total amount)                                                                                                                             | NA               |
| Outcome data             | 15* | <i>Cohort study</i> —Report numbers of outcome events or summary measures over time                                                                                                                          | NA               |
|                          |     | <i>Case-control study</i> —Report numbers in each exposure category, or summary measures of exposure                                                                                                         | NA               |
|                          |     | <i>Cross-sectional study</i> —Report numbers of outcome events or summary measures                                                                                                                           | 10-11, Figure 2  |
| Main results             | 16  | (a) Give unadjusted estimates and, if applicable, confounder-adjusted estimates and their precision (eg, 95% confidence interval). Make clear which confounders were adjusted for and why they were included | 11-13            |
|                          |     | (b) Report category boundaries when continuous variables were categorized                                                                                                                                    | NA               |
|                          |     | (c) If relevant, consider translating estimates of relative risk into absolute risk for a meaningful time period                                                                                             | NA               |
| Other analyses           | 17  | Report other analyses done—eg analyses of subgroups and interactions, and sensitivity analyses                                                                                                               | 11-15            |
| <b>Discussion</b>        |     |                                                                                                                                                                                                              |                  |
| Key results              | 18  | Summarise key results with reference to study objectives                                                                                                                                                     | 15-16            |
| Limitations              | 19  | Discuss limitations of the study, taking into account sources of potential bias or imprecision. Discuss both direction and magnitude of any potential bias                                                   | 16               |
| Interpretation           | 20  | Give a cautious overall interpretation of results considering objectives, limitations, multiplicity of analyses, results from similar studies, and other relevant evidence                                   | 16               |
| Generalisability         | 21  | Discuss the generalisability (external validity) of the study results                                                                                                                                        | 16-17            |
| <b>Other information</b> |     |                                                                                                                                                                                                              |                  |
| Funding                  | 22  | Give the source of funding and the role of the funders for the present study and, if applicable, for the original study on which the present article is based                                                | 21               |

\*Give information separately for cases and controls in case-control studies and, if applicable, for exposed and unexposed groups in cohort and cross-sectional studies.

**Note:** An Explanation and Elaboration article discusses each checklist item and gives methodological background and published examples of transparent reporting. The STROBE checklist is best used in conjunction with this article (freely available on the Web sites of PLoS Medicine at <http://www.plosmedicine.org/>, Annals of Internal Medicine at <http://www.annals.org/>, and Epidemiology at <http://www.epidem.com/>). Information on the STROBE Initiative is available at [www.strobe-statement.org](http://www.strobe-statement.org).

# BMJ Open

## Physicians' attitudes towards disclosure of payments from pharmaceutical companies in a nation-wide voluntary transparency database: a cross-sectional survey

|                                 |                                                                                                                                                                                                                                                                                                                                                                                                                                                                                                           |
|---------------------------------|-----------------------------------------------------------------------------------------------------------------------------------------------------------------------------------------------------------------------------------------------------------------------------------------------------------------------------------------------------------------------------------------------------------------------------------------------------------------------------------------------------------|
| Journal:                        | <i>BMJ Open</i>                                                                                                                                                                                                                                                                                                                                                                                                                                                                                           |
| Manuscript ID                   | bmjopen-2021-055963.R2                                                                                                                                                                                                                                                                                                                                                                                                                                                                                    |
| Article Type:                   | Original research                                                                                                                                                                                                                                                                                                                                                                                                                                                                                         |
| Date Submitted by the Author:   | 08-Feb-2022                                                                                                                                                                                                                                                                                                                                                                                                                                                                                               |
| Complete List of Authors:       | Stoll, Marlene; Universitätsmedizin der Johannes Gutenberg-Universität Mainz, Department of Psychiatry and Psychotherapy<br>Hubenschmid, Lara; Leibniz Institute for Resilience Research gGmbH<br>Koch, Cora; Medical Center-University of Freiburg, Department of Neurology and Neurophysiology<br>Lieb, Klaus; Universitätsmedizin der Johannes Gutenberg-Universität Mainz, Department of Psychiatry and Psychotherapy<br>Egloff, Boris; Johannes Gutenberg University Mainz, Department of Psychology |
| <b>Primary Subject Heading</b>: | Health policy                                                                                                                                                                                                                                                                                                                                                                                                                                                                                             |
| Secondary Subject Heading:      | Health policy                                                                                                                                                                                                                                                                                                                                                                                                                                                                                             |
| Keywords:                       | Health policy < HEALTH SERVICES ADMINISTRATION & MANAGEMENT, Protocols & guidelines < HEALTH SERVICES ADMINISTRATION & MANAGEMENT, MEDICAL ETHICS                                                                                                                                                                                                                                                                                                                                                         |
|                                 |                                                                                                                                                                                                                                                                                                                                                                                                                                                                                                           |

SCHOLARONE™  
Manuscripts



I, the Submitting Author has the right to grant and does grant on behalf of all authors of the Work (as defined in the below author licence), an exclusive licence and/or a non-exclusive licence for contributions from authors who are: i) UK Crown employees; ii) where BMJ has agreed a CC-BY licence shall apply, and/or iii) in accordance with the terms applicable for US Federal Government officers or employees acting as part of their official duties; on a worldwide, perpetual, irrevocable, royalty-free basis to BMJ Publishing Group Ltd ("BMJ") its licensees and where the relevant Journal is co-owned by BMJ to the co-owners of the Journal, to publish the Work in this journal and any other BMJ products and to exploit all rights, as set out in our [licence](#).

The Submitting Author accepts and understands that any supply made under these terms is made by BMJ to the Submitting Author unless you are acting as an employee on behalf of your employer or a postgraduate student of an affiliated institution which is paying any applicable article publishing charge ("APC") for Open Access articles. Where the Submitting Author wishes to make the Work available on an Open Access basis (and intends to pay the relevant APC), the terms of reuse of such Open Access shall be governed by a Creative Commons licence – details of these licences and which [Creative Commons](#) licence will apply to this Work are set out in our licence referred to above.

Other than as permitted in any relevant BMJ Author's Self Archiving Policies, I confirm this Work has not been accepted for publication elsewhere, is not being considered for publication elsewhere and does not duplicate material already published. I confirm all authors consent to publication of this Work and authorise the granting of this licence.

1  
2  
3 **Physicians' attitudes towards disclosure of payments from pharmaceutical**  
4 **companies in a nation-wide voluntary transparency database: a cross-sectional**  
5 **survey**  
6  
7  
8  
9

10 Marlene Stoll\*, Lara Hubenschmid, Cora Koch, Klaus Lieb, Boris Egloff  
11  
12

13  
14 Marlene Stoll (marlene.stoll@unimedizin-mainz.de)

15  
16 Department of Psychiatry and Psychotherapy, University Medical Center Mainz, Untere Zahlbacher Straße 8,  
17 55131 Mainz, Germany

18 <http://orcid.org/0000-0001-8847-5497>  
19

20  
21 Lara Hubenschmid (lara.hubenschmid@lir-mainz.de)

22 Leibniz Institute for Resilience Research (LIR), Mainz, Germany  
23

24  
25 Cora Koch (cora.koch@uniklinik-freiburg.de)

26 Department of Neurology and Neurophysiology, Medical Center - University of Freiburg, Freiburg, Germany

27 <http://orcid.org/0000-0003-0827-7023>  
28

29  
30 Klaus Lieb (klaus.lieb@lir-mainz.de)

31 Department of Psychiatry and Psychotherapy, University Medical Center Mainz, Mainz, Germany  
32

33  
34 Boris Egloff (egloff@uni-mainz.de)

35 <https://orcid.org/0000-0002-5736-9912>

36 Department of Psychology, Johannes Gutenberg University Mainz  
37  
38

39  
40 \* Corresponding author  
41  
42

43  
44 Word count: 3891  
45  
46  
47  
48  
49  
50  
51  
52  
53  
54  
55  
56  
57  
58  
59  
60

## ABSTRACT

**Objectives:** To investigate German physicians' attitudes towards and experiences with voluntary disclosure of payments by pharmaceutical companies in a public database and their impact on future decisions for or against disclosure.

**Design:** National cross-sectional survey conducted in 2018 among physicians who voluntarily disclosed at least one payment in the German transparency regulation.

**Setting:** Retrospective paper-pencil questionnaire about attitudes towards and experiences with voluntary payment disclosures in the first (2015) and second year (2016) of the German transparency regulation.

**Participants:** German physicians who disclosed either in the first year only, the second year only, or in both years of the transparency regulation.

**Primary outcomes:** (1) the probability to disclose in 2016, predicted by physicians' experience of reactions from others in 2015, descriptive norms, and attitudes towards transparency; (2) frequency and (3) content of reactions from others 2015 compared to 2016.

**Results:** Data of 234 respondents were analysed ( $n = 42, 45, \text{ and } 147$  physicians who disclosed in 2015, 2016 or both years, respectively). The probability to disclose in 2016 was not predicted by perceived reactions, norms, or attitudes towards transparency ( $p > .01$ ). Most participants reported not to have received any reactions by patients (190/234, 81%), colleagues (128/234, 55%) or the private environment (153/234, 65%). Neither frequency nor content of reactions differed between the first and second year (scale 1-5; frequency:  $Mdn_{2015,2016} = 1.33$  vs. 1.36,  $r_b = -.17$ ,  $p > .01$ ; content:  $Mdn_{2015,2016} = 2.69$  vs. 2.96,  $r_b = .19$ ,  $p > .01$ ). However, media reporting, fear of reputational damage and a feeling of being defamed were mentioned as reasons for non-disclosure.

**Conclusions:** While confirmatory analyses did not provide significant results, descriptive analyses showed that participants who voluntarily disclose payments mainly do not experience any reactions towards their disclosures but report fears about losing their reputation due to disclosures.

**Registration:** <https://osf.io/ztvur>

## ARTICLE SUMMARY

### Strengths and limitations of this study

- This study is the first survey of attitudes and experiences of physicians who voluntarily disclosed payments by pharmaceutical companies in a nation-wide transparency database.
- The sample takes into account whether physicians disclosed only in one year or in two consecutive years.
- The study was preregistered and provides qualitative and quantitative data on reasons for non-disclosure in this database.
- The questionnaire used in this study was only constructed for this purpose, so a direct comparison with other data is not possible.

## INTRODUCTION

The services sector of the health industry has a long tradition of close ties to the pharmaceutical industry.[1,2] Such ties have been shown to potentially lead to systematic biases in research and daily patient care.[3-5] Situations in which a secondary interest (e.g., financial gain) creates a risk that a primary interest (e.g., patient welfare) is unduly influenced are defined as conflicts of interest (COI).[1,6] Several approaches have been established to meet the challenge of COI in medicine, amongst which transparency regulations are very popular.[7-10] Transparency regulations have been introduced to shed light on formerly unknown information,[7,8] in this case: information about payments from pharmaceutical companies to health care professionals (HCPs). They differ in their coverage and implementation. In the United States, payments are fully transparent since the introduction of the Physician Payments Sunshine Act (PPSA) and publicly disclosed on the Open Payments website.[11] In Europe, transparency of payments to HCPs is mandatory only in some countries whereas in others such as Germany, it is regulated on a voluntary level.[7,9,12,13] However, disclosing COI may have unintended effects (e.g., loss of patient trust [14,15]), which may interact with the mode of the transparency regulation. This study explores the effects of Germany's voluntary transparency regulation of payments by pharmaceutical companies to HCPs, and investigates factors that lead HCPs to decide against disclosing payments in this database voluntarily.

### Effects of transparency guidelines

An intended effect of transparency guidelines is that publicly disclosing COI could motivate conflicted persons to change their behaviour in the sense that they decrease industry contacts in the future.[16] Thus, transparency regulations affect those who disclose information. In focus groups about experiences with the PPSA conducted in 2015,[17] physicians reported to be frustrated with the administrative process, to feel treated unfairly and to worry the disclosures might mislead patients.[17] For voluntary regulations, there is only anecdotal evidence: In a newspaper article[18] about physicians who decided against disclosure in the German transparency database, the interviewees stated to approve of transparency in general, but also said the current regulation was unfair, the disclosed information was misleading, and patients' trust would suffer.[18]

Public awareness thus appears to be a relevant element of transparency regulations.[16] Research has shown that patients would like their physicians to disclose financial COI, since they were concerned about biased clinical judgement.[19,20] However, at least in the United States, public awareness of the Open Payments website was low, as

1  
2  
3 shown by citizen surveys in 2014 and 2015: Only 9-12 % knew about the disclosed  
4 information.[21,22] Accordingly, U.S. physicians believed patients were uninterested in the  
5 data.[17] In Germany, physicians reported to fear negative effects on patients and therefore  
6 decided against disclosure.[18] The interaction between disclosing HCPs and the public and  
7 its effects on disclosing behaviour in a voluntary transparency database has not been  
8 systematically investigated yet.  
9  
10  
11  
12

13 Another important factor when discussing the effects of voluntary transparency  
14 regulations is the descriptive norm (i.e., behaviour that most of the peers show is considered  
15 “normal” behaviour[23,24]) and thus, the moment when area-wide information about the  
16 frequency of behaviour becomes available. From then on, information is available about how  
17 many HCPs voluntarily disclose payments, which forms a new reference frame for whether it  
18 is considered “normal” to disclose payments. An HCP’s decision to voluntarily disclose  
19 payments may depend on the subjectively estimated number of disclosing HCPs.  
20 Additionally, HCPs themselves will consider the fact that HCPs receive payments by  
21 pharmaceutical companies relatively “normal”, while most of the public will only learn about it  
22 with the first disclosure round and judge the behaviour as “abnormal” - an impression which  
23 will decline over time. Therefore, reactions by the public may be more pronounced in the first  
24 year of a transparency database than in the following.  
25  
26  
27  
28  
29  
30  
31  
32  
33

### 34 **Germany’s transparency regulation**

35  
36 In Germany, transparency of payments to HCPs is self-regulated by the  
37 pharmaceutical industry: 54 pharmaceutical companies organized in the “association of  
38 voluntary self-regulation in the pharmaceutical industry” passed a transparency codex which  
39 requires HCPs’ consent for the respective financial interaction to be disclosed on each  
40 company’s website.[12,13,25] First data were disclosed 2016 for payments from 2015. The  
41 investigative newsroom CORRECTIV gathered this data from each company’s website and  
42 established the “Euros for Doctors” database - a searchable platform that provided, per  
43 HCP, an overview of all payments they had received. The database started in 2016, but it  
44 was discontinued after only two years, making the investigation of long-term changes of  
45 disclosing rates difficult.[26] The kick-off was accompanied with investigative articles,[27]  
46 collaborating with the popular German online news magazine SPIEGEL ONLINE. They  
47 criticised the undifferentiated way of disclosing (e.g., the designated use of the money was  
48 not disclosed), and the large number of HCPs who did not disclose information.[18,28] An  
49 analysis of the 2015 and 2016 data of this database by our group [13] showed that about  
50 28% and 24% of all HCPs who had received payments agreed to disclose payments in 2015  
51 and 2016, respectively. Of all disclosing HCPs, 26% disclosed payments in both years, 44%  
52  
53  
54  
55  
56  
57  
58  
59  
60



1  
2  
3 disclosed only in 2015, and 29% only in 2016. The total number of disclosing HCPs  
4 decreased by 21%.  
5  
6  
7

## 8 **Study aims and research questions**

9

10 This study investigated HCPs' attitudes towards and experiences with the voluntary  
11 transparency database, and reasons for non-disclosure. Main research question 1 was: Do  
12 the reactions physicians experienced to their disclosed information or their perception of how  
13 normal it is to disclose predict the decision to disclose in the following year? Does a positive  
14 attitude moderate this effect? We hypothesized that the probability for deciding against  
15 disclosure in the subsequent year was higher the more unpleasant reactions were  
16 experienced and the lower the descriptive norm to disclose was estimated, and that a  
17 positive attitude towards transparency moderates this relationship. Research questions 2  
18 and 3 were: Do physicians experience a higher number of reactions and more negative  
19 reactions in the first than in the second year of the regulation? We hypothesized that  
20 reactions were more frequent and more negative in the first compared to the following year.  
21  
22  
23  
24  
25  
26  
27  
28  
29  
30  
31

## 32 **METHODS**

33  
34

### 35 **Sample**

36  
37 Our sample was drawn from the population of 28,230 HCPs who disclosed at least  
38 one financial interaction with a pharmaceutical company in 2015 or 2016 in the German  
39 transparency regulation.[13] We built our survey sample of 3 groups: HCPs who disclosed  
40 only 2015 (group 1), only 2016 (group 2), and HCPs who disclosed both 2015 and 2016  
41 (group 3). For further analyses in the underlying dissertation,[29] the third group was split up  
42 and analysed in three subgroups. Therefore, group 3 is bigger than groups 1 and 2. To  
43 enhance the probability that we survey HCPs who receive payments annually, we excluded  
44 HCPs who disclosed an annual payment sum < 1,000 €. This was based on the observation  
45 that the median disclosed annual payments of HCPs who disclosed in both years was 899€  
46 in 2015, compared to the median disclosed sum of HCPs who disclosed only once, which  
47 was 452€.[13] Based on that, we excluded 19,267 HCPs with annual payment sums < 1,000  
48 €. From the remaining 8,963 HCPs, possible participants were selected (see below). Further,  
49 we only included HCPs who worked as physicians at the time point of the survey. This  
50 criterion was evaluated after selection: for each chosen HCP, we verified by internet  
51 research whether they currently worked as a physician. If they did not or no information was  
52  
53  
54  
55  
56  
57  
58  
59  
60

1  
2  
3 available, another HCP was randomly selected, and it was checked whether they worked as  
4 physicians. This was repeated until the determined sample size was reached.  
5  
6  
7

## 8 **Procedure and sample size**

9  
10 For the planned regression model, an analysable sample of 150 participants was  
11 estimated based on Green's rule of thumb.[30] Expecting a response rate of 30-50%, we  
12 formulated a detailed sample plan: Starting in August 2018, we sent out questionnaires in  
13 waves of 50 questionnaires per group. Questionnaires were sent by mail, accompanied by a  
14 cover letter and a reply envelope. A reminder letter was sent after two weeks. Two weeks  
15 after that, we phoned those with a publicly available phone number. If the planned sample  
16 size was not reached a month after the last contact attempt, the next wave was started: The  
17 next 50 physicians were randomly selected and contacted as described above. We stopped  
18 this procedure for each group after the 30th questionnaire was received, which was after we  
19 had sent the third wave of questionnaires in February 2019. All examinable questionnaires  
20 that we received afterwards were also included in the data analysis. Study procedures were  
21 preregistered at [www.osf.io/ztvur](http://www.osf.io/ztvur).  
22  
23  
24  
25  
26  
27  
28  
29

## 30 **Questionnaire**

31  
32 The two-page questionnaire contains questions about demographics, disclosure, and  
33 attitude towards transparency in German language. Response formats include five-level  
34 Likert items, default categories, and open formats. Responses were given by ticking boxes  
35 or writing text onto the questionnaire. It was clarified in the cover letter that sending back  
36 completed questionnaires implies that data will be analysed anonymously. All items and  
37 response options can be found in Supplement A.  
38  
39  
40  
41  
42

## 43 **Main outcomes**

44  
45 The items to investigate research questions 1–3 are listed in Table 1. Physicians  
46 were asked about the frequency, content, and pleasantness of reactions that they  
47 experienced. Those questions could be answered separately for the reactions of patients,  
48 colleagues, and the private environment. For the analyses of the main research questions,  
49 an average value was calculated across the three groups of people. Participants of group 2  
50 were asked about reactions to their disclosure 2016; all other participants were asked about  
51 reactions to their disclosure 2015.  
52  
53  
54  
55  
56  
57  
58  
59  
60

**Table 1.***Translated List of Relevant Questionnaire Items With Response Format*

| Variable                   | Item<br>Response format                                                                                                                                                         |
|----------------------------|---------------------------------------------------------------------------------------------------------------------------------------------------------------------------------|
| <b>Research question 1</b> |                                                                                                                                                                                 |
| Pleasantness of reactions  | “If there were reactions, how did you perceive them?”<br><i>1-5: very unpleasant, rather unpleasant, neutral, rather pleasant, very pleasant</i>                                |
| Descriptive norm           | “What percentage of German physicians do you estimate consented to disclose in the database?”<br><i>___ % (open format in percent)</i>                                          |
| Attitude                   | “To what extent do you agree with the following statement: In principle, I approve of transparency.”<br><i>1-5: strongly disagree, disagree, neutral, agree, strongly agree</i> |
| <b>Research question 2</b> |                                                                                                                                                                                 |
| Frequency of reactions     | “How many reactions did you get from patients / colleagues / your private environment?”<br><i>1-5: none, very few, rather few, rather many, many</i>                            |
| <b>Research question 3</b> |                                                                                                                                                                                 |
| Content of reactions       | “If there were reactions, how was their content?”<br><i>1-5: very negative, somewhat negative, neutral, somewhat positive, very positive</i>                                    |

*Note.* The original questionnaire was in German; the translated complete questionnaire can be found in Supplement A.

## Analysis

To investigate hypothesis 1, a multiple logistic regression with the outcome variable disclosure 2016 (0 = no disclosure, 1 = disclosure) and the main predictors X1: pleasantness of reactions, and X2: descriptive norm was conducted. To investigate the moderating role of X3: attitude, two interaction terms were added as predictors: X3\*X1 and X3\*X2. To test hypothesis 2 and 3, the frequency and content of reactions 2015 were compared with the frequency and content of reactions 2016. Directed tests for independent samples were conducted (more frequent/more negative reactions in 2015 than 2016). To test for normal distribution, the Shapiro-Wilk test was used. Data in all groups were not normally distributed on the respective dependent variable, therefore Wilcoxon tests were conducted. Effect sizes with 95% CI are given as rank-biserial correlations ( $r_b$ ). A conservative alpha level of .01 was used for all tests.

Exploratively, we performed a content analysis[31] of answers to the question “Was there anything that bothered you about the reactions?”. All answers were reviewed by two researchers independently and categories were suggested. From the suggested categories, ten final categories were decided upon based on mutual consensus. Then, each answer was categorized independently (overall interrater agreement: 93%). Diverging ratings were discussed until consensus was reached. Statistical analyses were performed in JASP version 0.10.2,[32] RStudio, R version 3.6.1,[33] and Microsoft Excel (2011).

## Patient and public involvement

Patients and/or the public were not involved in the design, or conduct, or reporting, or dissemination plans of this research.

## RESULTS

### Sample

We contacted  $n = 750$  physicians and received 236 filled-in questionnaires (Figure 1). The response rate was 35% (236/678; 72 questionnaires were undeliverable). Two questionnaires needed to be excluded: one was missing a page and could not be allocated to a group; another contained a note that the participant was not a medical doctor but a biologist. The remaining 234 questionnaires were allocated to the groups and analysed. Mean and median age of participants was 53 years ( $SD = 8.29$ ;  $IQR = 10$ ; Range: 31-75;

1  
2  
3 48/234 (21%) female, 185/234 (79%) male, 1/234 (0%) missing). Further sample  
4 characteristics are listed in Supplement B.  
5  
6  
7

8 **- Insert Figure 1 about here -**  
9

### 10 11 12 13 **Physicians' experiences with the transparency database** 14

15 Of the 234 participants, 87 (37%) stated they had not looked at the database, and 131 (56%)  
16 reported to have at least somewhat followed media coverage about the database. Most  
17 participants said they did not know whether their payments had been correctly reported: Of  
18 189 participants who agreed to disclose payments in 2015, 91 (48%) did not know; 70 (37%)  
19 said their payments had been correctly reported, and 24 (13%) said they had been  
20 incorrectly reported. Of 192 participants who agreed to disclose payments in 2016, 105  
21 (55%) did not know, 60 (31%) said their payments had been correctly reported and 23 (13%)  
22 said they had been incorrectly reported. Most participants stated they had not received any  
23 reactions from patients (190/234, 81%), colleagues (128/234, 55%) or the private  
24 environment (153/234, 65%). Response rates for items of content and pleasantness of  
25 reactions were between 26% (60/234, pleasantness of patients' reactions) and 48%  
26 (113/234, content of colleagues' reactions). See Figure 2 for detailed results.  
27  
28  
29  
30  
31  
32  
33  
34

35 **- insert Figure 2 about here -**  
36  
37  
38  
39

### 40 **Descriptive norm** 41

42 For investigating how high participants estimated the percentage of German  
43 physicians who disclosed in the database in 2015 and 2016, data were available from 216  
44 and 218 participants and ranged between 0% and 100%. For 2015, participants estimated  
45 on average that 33% of German physicians had agreed to disclose ( $SD = 21$ ,  $Mdn = 30$ ,  
46  $IQR = 30$ ) and for 2016, participants estimated on average that 31% of German physicians  
47 agreed to disclose ( $SD = 20$ ,  $Mdn = 25$ ,  $IQR = 25$ ).  
48  
49  
50  
51

### 52 **Investigating non-disclosure** 53

54 To answer research question 1, we investigated data of those participants who  
55 disclosed in 2015 (groups 1, 3;  $n = 189$ ) to predict whether they disclosed again in 2016  
56 (group 3;  $n = 147$ ) or did not disclose again in 2016 (group 1;  $n = 42$ ). Neither regression  
57 model 1 with the three predictor variables X1: pleasantness of reactions, X2: descriptive  
58  
59  
60

norm and X3: attitude significantly improved the model fit compared to the null model ( $\chi^2 = 1.0, p = .792$ ) nor regression model 2, in which the interaction terms X3\*X2 and X3\*X1 were added ( $\chi^2 = 12.66, p = .027$ ). A more detailed description of regression model 1 and 2 can be seen in Supplement C.

We additionally explored the reasons for participants' non-disclosure in general. In our sample, two groups did not disclose payments in one year: Participants of group 1 had an entry in 2015 but not in 2016 ( $n = 42$ ), and participants of group 2 had no entry in 2015 but in 2016 ( $n = 45$ ). We asked these participants for the reason for the missing entry (Table 2). The most frequently chosen reason in group 1 was that they had consciously decided against disclosure (50%, vs. 18% in group 2). The most frequently chosen answer in group 2 was that they were not asked for their consent to disclose (36%, vs. 7% in group 1). We further asked how several statements applied to the participants in case they consciously decided against disclosure. Most participants reported that considerations of public opinion or media reporting led to the decision against disclosure (25/32, 78%) (Figure 3).

**Table 2**  
*Reasons for Non-disclosure*

|                                                              | group 1                   | group 2                   |
|--------------------------------------------------------------|---------------------------|---------------------------|
| <b>You don't have an entry in the year 2015 (2016). Why?</b> | <b>abs. frequency (%)</b> | <b>abs. frequency (%)</b> |
| I have not received any payments.                            | 14/42 (33%)               | 10/45 (22%)               |
| I was not asked for my consent to disclose.                  | 3/42 (7%)                 | 16/45 (36%)               |
| I forgot to answer the inquiry for disclosure consent.       | 1/42 (2%)                 | 2/45 (4%)                 |
| I consciously decided against disclosure.                    | 21/42 (50%)               | 8/45 (18%)                |
| No reply                                                     | 3/42 (7%)                 | 9/45 (20%)                |

*Note.* Participants were asked to choose one of the four options. Group 1 = disclosure in 2015, but not in 2016; group 2 = no disclosure in 2015, but in 2016.

1  
2  
3 - insert Figure 3 about here -  
4  
5  
6  
7

## 8 Year of disclosure

9  
10 To investigate research questions 2 and 3, we compared the frequency and content  
11 of reactions to participants who disclosed for the first time in 2015 (groups 1, 3) with data of  
12 participants who disclosed for the first time in 2016 (group 2). Data for frequency of reactions  
13 were available for 2015 from 187/198 (99%) and for 2016 from 44/45 (98%) participants;  
14 data for content of reactions were available for 2015 from 110/198 (60%) and for 2016 from  
15 19/45 (42%) participants. All variables were significantly non-normal (all  $W = 0.71-0.90$ , all  $p$   
16  $<.01$ ). Testing hypothesis 2, we found no statistically significant difference between  
17 frequency of reactions 2015 and 2016 (2015:  $M = 1.54$ ,  $SD = 0.66$ ,  $Mdn = 1.33$ ,  $IQR = 1$ ; and  
18 2016:  $M = 1.36$ ,  $SD = 0.53$ ,  $Mdn = 1.00$ ,  $IQR = 0.67$ ), as evidenced by a Wilcoxon rank-sum  
19 test ( $W = 3410$ ,  $r_b = -.17$ , 95% CI  $[-\infty, -0.01]$ ,  $p = .031$ ). Testing hypothesis 3, we found no  
20 statistically significant difference between negativity of reactions 2015 and 2016 (2015:  $M =$   
21  $2.69$ ,  $SD = 0.71$ ,  $Mdn = 3.00$ ,  $IQR = 1$ ; and 2016:  $M = 2.96$ ,  $SD = 0.67$ ,  $Mdn = 3.00$ ,  $IQR =$   
22  $0.33$ ), as indicated by a Wilcoxon rank-sum test ( $W = 1243$ ,  $r_b = .19$ ; 95% CI  $[-0.05, \infty]$ ,  $p =$   
23  $.085$ ).  
24  
25  
26  
27  
28  
29  
30  
31  
32  
33  
34

## 35 Further exploratory investigations

36  
37 Participants were asked to indicate their agreement with statements about attitude  
38 towards disclosure in general and in research. The statements that participants agreed with  
39 most strongly were that disclosure of payments should be more nuanced, that the  
40 undifferentiated display of the disclosures brings science into disrepute and that disclosure  
41 leads to a wrong impression in the public (Table 3).  
42  
43  
44  
45  
46  
47  
48  
49  
50  
51  
52  
53  
54  
55  
56  
57  
58  
59  
60

**Table 3***Attitudes towards Transparency.*

|                                                                                                                          | <i>n</i> | Strongly disagree | Disagree        | Neutral         | Agree           | Strongly agree   |
|--------------------------------------------------------------------------------------------------------------------------|----------|-------------------|-----------------|-----------------|-----------------|------------------|
| Payments by pharmaceutical companies are a risk for the independence of clinical practice and research.                  | 233      | 26/233<br>(11%)   | 41/233<br>(18%) | 35/233<br>(15%) | 90/233<br>(39%) | 41/233<br>(18%)  |
| In principle, I approve of transparency.                                                                                 | 233      | 4/233<br>(2%)     | 3/233<br>(1%)   | 16/233<br>(7%)  | 39/233<br>(17%) | 171/233<br>(73%) |
| Collaboration with pharmaceutical companies and receiving payments by those companies is part of the medical profession. | 233      | 19/230<br>(8%)    | 35/230<br>(15%) | 66/230<br>(28%) | 71/230<br>(31%) | 39/230<br>(17%)  |
| Disclosure of payments should be more nuanced.                                                                           | 233      | 8/233<br>(3%)     | 2/233<br>(3%)   | 43/233<br>(18%) | 51/233<br>(22%) | 124/230<br>(53%) |
| Disclosure of payments increases patients' trust in me.                                                                  | 230      | 72/233<br>(31%)   | 45/233<br>(19%) | 75/233<br>(32%) | 32/233<br>(14%) | 9/233<br>(4%)    |
| Disclosure leads to a wrong impression in the public.                                                                    | 233      | 9/233<br>(4%)     | 24/233<br>(10%) | 31/233<br>(13%) | 78/233<br>(33%) | 91/233<br>(39%)  |
| In case you are working in research:                                                                                     |          |                   |                 |                 |                 |                  |
| Transparency guidelines impede my scientific work.                                                                       | 154      | 45/154<br>(29%)   | 40/154<br>(26%) | 29/154<br>(19%) | 32/154<br>(21%) | 8/154<br>(5%)    |
| I have been confronted with disclosures within the context of a published study at least once.                           | 154      | 56/154<br>(36%)   | 17/154<br>(11%) | 22/154<br>(14%) | 24/154<br>(16%) | 35/154<br>(23%)  |
| My research results were criticized because of my disclosures at least once.                                             | 152      | 119/152<br>(78%)  | 11/152<br>(7%)  | 13/152<br>(9%)  | 5/152<br>(3%)   | 4/152<br>(3%)    |
| The undifferentiated displaying of the disclosures brings science into disrepute.                                        | 155      | 10/155<br>(6%)    | 5/155<br>(3%)   | 16/155<br>(10%) | 37/155<br>(24%) | 87/155<br>(56%)  |



Sixty-eight participants answered the question “Was there anything that bothered you about the reactions?”. The content categories with respective frequencies are:

- negative media reporting (20/68, 29%)
- defamation / criminalization (17/68, 25%)
- unknown cases of undisclosed information (12/68, 18%)
- disclosed information is not put into context with services rendered in return (12/68, 18%)
- misleading data representation (7/68, 10%)
- contacted by lawyer who aimed a class action against CORRECTIV (7/68, 10%)
- feeling of being dragged into the public eye (5/68, 7%)
- feeling of being treated unfairly (5/68, 7%)
- involvement of employer (4/68, 6%)
- others expressed lack of understanding (2/68, 3%).

## DISCUSSION

### Principal findings

The aim of this study was to gain insight into physicians' attitudes towards and experiences with the voluntary German transparency regulation. Research question 1 aimed to investigate how these experiences affect future disclosure behaviour, but no significant prediction model was found. Research questions 2 and 3 aimed to investigate whether reactions to disclosures between the first and the second year of the database differed. No significant difference in the frequency or content reactions was found on the alpha level of .01, which might be related to the fact that most participants in our sample had not received any reactions towards their disclosure. The fewest reactions came from patients. Only every fifth physician stated they had received at least “very few” reactions by patients.

We observed that the reasons for non-disclosure in our sample differed depending on the time point of non-disclosure: Participants who had disclosed in the first but not in the second year more often said they had consciously decided against disclosure than those who had not disclosed in the first year but in the second year. The latter more often said that they had not been asked for consent by the respective pharmaceutical company. Most physicians who had consciously decided against disclosure said it was because of public opinion and media reporting. We also found that nearly half of the participating physicians had not looked at the database and did not know whether their disclosed payment sum was correct. However, more than half of them at least somewhat followed the media coverage

1  
2  
3 about the database and some reported high objections to public exposure. This can be  
4 interpreted according to the spotlight effect which describes that people overestimate the  
5 attention they receive by others.[16] Several participants stated concerns about the public  
6 opinion and a feeling about being denounced, which is in line with the observation that  
7 physicians are concerned that COI disclosure may damage their reputation.[17] This  
8 tendency relates to the psychological heuristic that people do not like to be viewed as  
9 biased. Studies show that if people are able to avoid COI, they may be motivated to avoid  
10 such conflicts so that they can disclose the absence of conflicts.[34] In case of voluntary  
11 disclosure, however, people can simply avoid being viewed as biased by deciding against  
12 disclosure.  
13  
14  
15  
16  
17  
18  
19

## 20 **Strengths and weaknesses**

21  
22 The strength of this study is that it provides quantitative and qualitative data on  
23 physicians' experiences with COI disclosure in a national database. To our knowledge, no  
24 such evidence exists for any European transparency regulation in medicine. The  
25 investigated sample was stratified to their disclosing behaviour. Due to the otherwise random  
26 selection of participants, our sample comprises a great bandwidth of age, disciplines, and  
27 workplaces. The study, however, also has several limitations. A common problem in survey  
28 methods, answers may be skewed by social desirability.[35] The answers to a  
29 controversially discussed subject may be even more skewed: Physicians may be more  
30 motivated to respond to the survey if they have strong opinions on transparency, or if they  
31 experienced extreme reactions towards their disclosure. We tried to counter this by our  
32 efforts to increase the response rate. Additionally, the questionnaire we used was only  
33 constructed for this study, so our data cannot be directly compared to other data.  
34  
35  
36  
37  
38  
39  
40  
41  
42

## 43 **Meaning of the study**

44  
45 Physicians in our sample reported to be concerned about reputational damage and  
46 public exposure. Those who did not disclose payments had various reasons. Mandatory  
47 transparency could approach these issues: Firstly, if disclosure is mandatory, it will no longer  
48 feel "unfair" that some disclose information and some hide this information. Secondly, if  
49 conducted in a standardized form, everyone's information is available, and therefore the  
50 disclosed information is easier to compare and better to interpret, which will lessen the risk  
51 of unfair reputational damage and might enable a fair discussion between pharmaceutical  
52 companies, physicians, researchers, and the public.  
53  
54  
55  
56  
57

58  
59 Currently, the consent rate to disclose payments by pharmaceutical companies in  
60 Germany is low, compared to other countries.[12,13] In our study we observed that even if

1  
2  
3 physicians consented to disclosure, our participants mainly appear not to have used the  
4 database nor checked their entries. Therefore, we propose that disclosers need to be  
5 educated about the background of transparency regulations and the concept of COI to raise  
6 commitment.  
7  
8  
9

10  
11 For the management of financial COI in medicine, transparency is by now seen as a  
12 necessary, but not sufficient, measure.[7,10,36] Managing the influence of COI involves  
13 further higher action, e.g. people with relevant COI being excluded from guideline  
14 development groups.[1,36] Voluntary transparency regulations do not serve this aim, but  
15 may paint a distorted picture of the actual situation. The voluntary database investigated in  
16 this study is a good example: Only 24% of HCPs decided to disclose information about  
17 pharmaceutical payments in 2016, [13] which means that the publicly visible amount of  
18 payments and number of HCPs who receive payments very probably greatly underestimates  
19 the actual amount of payments and the actual number of HCPs. Voluntary transparency  
20 regulations may fuel discussion and raise awareness for the interaction of pharmaceutical  
21 companies with HCPs, however this may backfire if information is not contextualized, and  
22 the regulation is not driven forward.  
23  
24  
25  
26  
27  
28  
29  
30

### 31 **Unanswered questions and future research**

32  
33 In this sample, reasons for non-disclosure were heterogeneous. More research is  
34 needed about the motives for and against voluntary disclosure to improve current  
35 transparency policies. Our data show that there are more issues that need to be considered  
36 about the experiences with transparency guidelines, such as the fear of reputational  
37 damage. Broad evaluations of transparency guidelines including all involved persons are  
38 needed to get a full picture of the current situation.  
39  
40  
41  
42  
43  
44

### 45 **CONCLUSION**

46  
47 The study at hand was the first survey of physicians who disclosed voluntarily in a  
48 nation-wide transparency database. We found no significant predictors for future disclosure  
49 behaviour and no statistically significant difference in the reactions to disclosures between  
50 the first year and the second year of the database. The exploratory results of this study show  
51 preliminary evidence that although German HCPs experienced only few reactions by  
52 patients, colleagues or in private, they are concerned that disclosing payments in a public  
53 database will result in reputational damage. Considering public opinion and media exposure  
54 was the most frequent reason for non-disclosure in this subsample. We propose that  
55  
56  
57  
58  
59  
60

1  
2  
3 mandatory disclosure could be a solution to this problem by creating a standardized  
4 environment for an open discussion.  
5  
6  
7  
8  
9

## 10 **Acknowledgements**

11  
12  
13 We thank CORRECTIV for providing the database. Many thanks also to Jasmin Peifer and  
14 Marc Himmelmann for their help with the database and the paper questionnaire, and to  
15 Alexander Mancini for discussing the free answers.  
16  
17  
18  
19  
20  
21

22  
23 **Contributorship Statement:** MS, CK, KL and BE were responsible for the study  
24 conception and design. MS, KL and BE were responsible for title and abstract and full-text  
25 review. MS and LH were responsible for data extraction and validation. MS, CK and BE  
26 analysed and interpreted results. MS drafted the manuscript. All authors provided a critical  
27 review and approved the final manuscript. MS is the guarantor.  
28  
29  
30  
31

32 **Funding:** Funded by Volkswagen Foundation (grant no. A118085 (ref.91498) to KL).  
33  
34

35 **Competing Interests:** CK, MS and LH declared that they had received salary from the  
36 Volkswagen Foundation to conduct the project. KL declared that he had received a research  
37 grant from the Volkswagen Foundation to conduct the project. BE declared that he has no  
38 conflict of interest.  
39  
40  
41  
42

43 **Patient consent for publication:** not required.  
44  
45

46 **Provenance and peer review:** -  
47  
48

49 **Data sharing statement:** Data are available on reasonable request by emailing MS.  
50  
51

52  
53 **Note:** This paper contains extended passages from the dissertation by Marlene Stoll [29].  
54

55 **Ethics statement:** The ethics committee of the Landesärztekammer Rheinland-Palatinate  
56 decided that a further consultation is not necessary since no personal but only anonymous  
57 data were processed (2018-13295-Epidemiologie).  
58  
59  
60

## REFERENCES

1. Institute of Medicine Committee on Conflict of Interest in Medical Research. The National Academies Collection: Reports funded by National Institutes of Health. In: Lo B, Field B, eds. Conflict of interest in medical research, education, and practice. Washington (DC): National Academies Press; 2009.
2. Chimonas S, Mammor M, Zimbalist S, Barrow B, Bach PB, Korenstein D. BMJ. 2021 Nov 3; 375:e066576
3. Lundh A, Lexchin J, Mintzes B, et al. Industry sponsorship and research outcome: systematic review with meta-analysis. *Intensive Care Med*. 2018 Oct 1;44(10):1603–12 <https://doi.org/10.1007/s00134-018-5293-7>.
4. Mitchell AP, Trivedi NU, Gennarelli RL, et al. Are Financial Payments From the Pharmaceutical Industry Associated With Physician Prescribing? *Ann Intern Med*. 2021 Mar 16;174(3):353–61 <https://doi.org/10.7326/M20-5665>.
5. Nejstgaard CH, Bero L, Hróbjartsson A, et al. Association between conflicts of interest and favourable recommendations in clinical guidelines, advisory committee reports, opinion pieces, and narrative reviews: systematic review. *BMJ*. 2020 Dec 9;371:m4234 <https://doi.org/10.1136/bmj.m4234>.
6. Thompson D. Understanding financial conflicts of interest. *N Engl J Med*. 1993.
7. Fabbri A, Santos A, Mezinska S, et al. Sunshine Policies and Murky Shadows in Europe: Disclosure of Pharmaceutical Industry Payments to Health Professionals in Nine European Countries. *Int J Health Policy Manag*. 2018 Mar 14;7(6):504–9 <https://doi.org/10.15171/ijhpm.2018.20>.
8. Grundy Q, Habibi R, Shnier A, et al. Decoding disclosure: Comparing conflict of interest policy among the United States, France, and Australia. *Health Policy*. 2018 May 1;122(5):509–18 <https://doi.org/10.1016/j.healthpol.2018.03.015>.
9. Europe M-MH. Shedding Light on Transparent Cooperation in Healthcare. The way forward for sunshine and transparency laws across Europe, 2020. Available: <https://mhe-sme.org/wp-content/uploads/2019/01/MHE-SHEDDING-LIGHT-REPORT-Final.pdf>
10. Bradley SH, DeVito NJ, Lloyd K, Richards GC, Rombey T, Wayant C, Gill PJ. Reducing bias and improving transparency in medical research: a critical overview of the problems, progress and suggested next steps. *J R Soc Med*. 2020 Nov 1;113(11):433–443. <https://doi.org/10.1177/0141076820956799>
11. Open Payments [Website]. Available from: <https://www.cms.gov/openpayments> (accessed 19 Nov 2021).
12. Mulinari S, Martinon L, Jachiet P-A, et al. Pharmaceutical industry self-regulation and non-transparency: country and company level analysis of payments to healthcare professionals in seven European countries. *Health Policy*. 2021 Jul 1;125(7):915–22 <https://doi.org/10.1016/j.healthpol.2021.04.015>.
13. Stoll M, Hubenschmid L, Koch C, et al. Voluntary disclosures of payments from pharmaceutical companies to healthcare professionals in Germany: a descriptive

- study of disclosures in 2015 and 2016. *BMJ Open*. 2020 Sep 1;10(9):e037395  
<http://dx.doi.org/10.1136/bmjopen-2020-037395>.
14. Loewenstein G, Sah S, Cain DM. The Unintended Consequences of Conflict of Interest Disclosure. *JAMA*. 2012 Feb 15;307(7):669–70  
<https://doi.org/10.1001/jama.2012.154>.
15. Sah S, Loewenstein G, Cain DM. Insinuation Anxiety: Concern That Advice Rejection Will Signal Distrust After Conflict of Interest Disclosures. *Pers Soc Psychol Bull*. 2019;45(7);1099–1112 <https://doi.org/10.1177/0146167218805991>.
16. Loewenstein G, Sunstein CR, Golman R. Disclosure: Psychology Changes Everything. *Annu Rev Econ*. 2014;6:391–419 <https://doi.org/10.1146/annurev-economics-080213-041341>.
17. Chimonas S, DeVito NJ, Rothman DJ. Bringing Transparency to Medicine: Exploring Physicians' Views and Experiences of the Sunshine Act. *Am J Bioeth*. 2017 Jun 3;17(6):4–18 <https://doi.org/10.1080/15265161.2017.1313334>.
18. Boytchev WB. Warum Ärzte schweigen. 2016 Jul 17; Available from: <https://correctiv.org/aktuelles/euros-fuer-aerzte/2016/07/17/warum-aerzte-schweigen> (accessed 19 Nov 2021).
19. Licurse A, Barber E, Joffe S, Gross C. The impact of disclosing financial ties in research and clinical care: a systematic review. *Arch Intern Med*. 2010;170(8):675–82. <https://doi.org/10.1001/archinternmed.2010.39>
20. Riedl EM, König J, Koch C, Lieb K. Einstellungen und Erwartungen von Patienten in Bezug auf Interessenkonflikte ihrer behandelnden Ärzte. *Z Evid Fortbild Qual Gesundheitswes*. 2016 Jan 1;110–111;45–53  
<https://doi.org/10.1016/j.zefq.2015.12.002>
21. Pham-Kanter G, Mello MM, Lehmann LS, et al. Public Awareness of and Contact With Physicians Who Receive Industry Payments: A National Survey. *J Gen Intern Med*. 2017 Jul 1;32(7):767–74 <http://dx.doi.org/10.1007/s11606-017-4012-3>.
22. Young PD, Xie D, Schmidt H. Towards Patient-Centered Conflicts of Interest Policy. *Int J Health Policy Manag*. 2017 Oct 29;7(2):112–9  
<https://dx.doi.org/10.15171%2Fijhpm.2017.128>.
23. Chung A, Rimal RN. Social norms: a review. *Rev Commun Res*. 2016;4:1–28  
<https://doi.org/10.12840/issn.2255-4165.2016.04.01.008>.
24. Lapinski MK, Rimal RN. An Explication of Social Norms. *Commun Theory*. 2005 May 1;15(2):127–47 <https://doi.org/10.1111/j.1468-2885.2005.tb00329.x>.
25. Freiwillig Selbstkontrolle für die Arzneimittelindustrie e.V. FSA-Transparenzkodex. 2019. Available from: [https://www.fsa-pharma.de/de/kodizes/sk\\_fsa\\_transparenzkodex\\_13.03.2019.pdf](https://www.fsa-pharma.de/de/kodizes/sk_fsa_transparenzkodex_13.03.2019.pdf) (accessed 19 Nov 2021).
26. Richter, F. "Euros für Ärzte"-Datenbank beendet. 2021 Jan 14; Available from: <https://correctiv.org/aktuelles/2021/01/14/euros-fuer-aerzte-datenbank-beendet/> (accessed 19 November 2021).

- 1  
2  
3 27. CORRECTIV. Euros für Ärzte. 2021. Available from:  
4 <https://correctiv.org/aktuelles/euros-fuer-aerzte> (accessed 19 November 2021).  
5  
6 28. Elmer C, Stotz P. Warum Ärzte schweigen. 2016 Jul 14; Available from:  
7 [https://www.spiegel.de/gesundheit/diagnose/euros-fuer-aerzte-datenbank-wie-viel-](https://www.spiegel.de/gesundheit/diagnose/euros-fuer-aerzte-datenbank-wie-viel-hat-mein-arzt-bekommen-a-1102819.html)  
8 [hat-mein-arzt-bekommen-a-1102819.html](https://www.spiegel.de/gesundheit/diagnose/euros-fuer-aerzte-datenbank-wie-viel-hat-mein-arzt-bekommen-a-1102819.html) (accessed 19 November 2021).  
9  
10 29. Stoll M. Unintended Consequences of Conflict of Interest Disclosure: a Psychological  
11 Perspective [Internet]. Johannes Gutenberg-Universität Mainz; 2021 [cited 2021 Jul  
12 28]. Available from: <https://openscience.ub.uni-mainz.de/handle/20.500.12030/5731>  
13  
14 30. Green SB. How Many Subjects Does It Take To Do A Regression Analysis. *Multivar*  
15 *Behav Res.* 1991 Jul 1;26(3):499–510 [https://doi.org/10.1207/s15327906mbr2603\\_7](https://doi.org/10.1207/s15327906mbr2603_7).  
16  
17 31. Mayring P. Qualitative content analysis: theoretical foundation, basic procedures and  
18 software solutions [Internet]. Social Science Open Access Repository; 2014 [cited  
19 2021 Nov 19]. Available from: [https://nbn-resolving.org/urn:nbn:de:0168-ssoar-](https://nbn-resolving.org/urn:nbn:de:0168-ssoar-395173)  
20 [395173](https://nbn-resolving.org/urn:nbn:de:0168-ssoar-395173)  
21  
22 32. JASP Team. JASP (Version 0.10.2). 2019.  
23  
24 33. R Core Team. R: A Language and Environment for Statistical Computing. 2019.  
25 Available from: <https://www.R-project.org>  
26  
27 34. Sah S, Loewenstein G. Nothing to Declare: Mandatory and Voluntary Disclosure  
28 Leads Advisors to Avoid Conflicts of Interest. *Psychol Sci.* 2014;25(2):575-584  
29 <https://doi.org/10.1177%2F0956797613511824>.  
30  
31 35. Barclay S, Todd C, Finlay I, et al. Not another questionnaire! Maximizing the  
32 response rate, predicting non-response and assessing non-response bias in postal  
33 questionnaire studies of GPs. *Fam Pract.* 2002 Feb 1;19(1):105–11  
34 <https://doi.org/10.1093/fampra/19.1.105>.  
35  
36 36. Lexchin J, Fugh-Berman A. A Ray of Sunshine: Transparency in Physician-Industry  
37 Relationships is not Enough. *J Gen Intern Med.* 2021 Oct 1;36(10):3194-3198  
38 <https://doi.org/10.1007/s11606-021-06657-0>  
39  
40  
41  
42  
43  
44  
45

## Figures

46  
47  
48 Figure 1. Participant Flow Chart.

49  
50 Figure 2. Relative Frequencies of Item Answers for Frequency, Content, and Pleasantness  
51 of Reactions from Recipients, N = 234.

52  
53 Figure 3. Factors Considered for Decision Against Disclosure.  
54  
55  
56  
57  
58  
59  
60

1  
2  
3  
4  
5  
6  
7  
8  
9  
10  
11  
12  
13  
14  
15  
16  
17  
18  
19  
20  
21  
22  
23  
24  
25  
26  
27  
28  
29  
30  
31  
32  
33  
34  
35  
36  
37  
38  
39  
40  
41  
42  
43  
44  
45  
46  
47  
48  
49  
50  
51  
52  
53  
54  
55  
56  
57  
58  
59  
60

For peer review only



1  
2  
3  
4  
5  
6  
7  
8  
9  
10  
11  
12  
13  
14  
15  
16  
17  
18  
19  
20  
21  
22  
23  
24  
25  
26  
27  
28  
29  
30



**Frequency of Reactions**

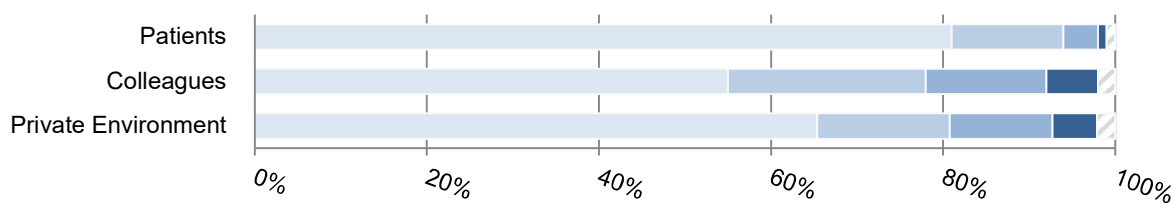

|               | Private Environment | Colleagues | Patients |
|---------------|---------------------|------------|----------|
| ■ none        | 65%                 | 55%        | 81%      |
| ■ very few    | 15%                 | 23%        | 13%      |
| ■ rather few  | 12%                 | 14%        | 4%       |
| ■ rather many | 5%                  | 6%         | 1%       |
| ■ many        | 0%                  | 0%         | 0%       |
| ▨ NA          | 2%                  | 2%         | 1%       |

**Content of Reactions**

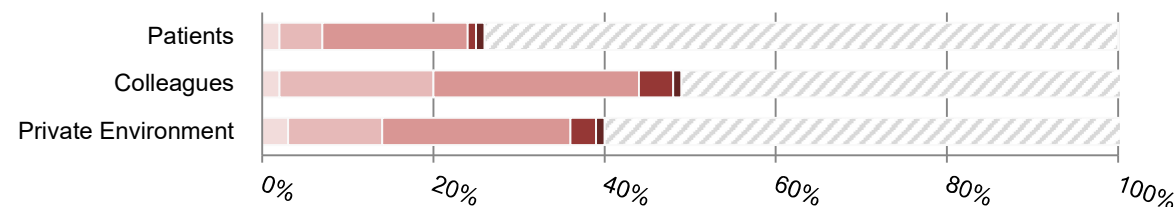

|                 | Private Environment | Colleagues | Patients |
|-----------------|---------------------|------------|----------|
| ■ very negative | 3%                  | 2%         | 2%       |
| ■ negative      | 11%                 | 18%        | 5%       |
| ■ neutral       | 22%                 | 24%        | 17%      |
| ■ positive      | 3%                  | 4%         | 1%       |
| ■ very positive | 1%                  | 1%         | 1%       |
| ▨ NA            | 61%                 | 52%        | 74%      |

**Pleasantness of Reactions**

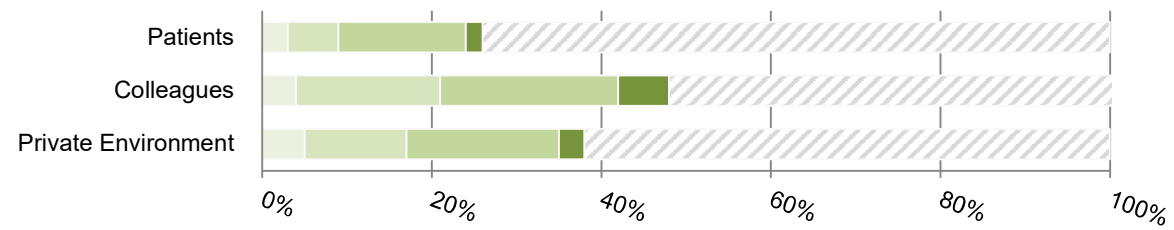

|                     | Private Environment | Colleagues | Patients |
|---------------------|---------------------|------------|----------|
| ■ very unpleasant   | 5%                  | 4%         | 3%       |
| ■ rather unpleasant | 12%                 | 17%        | 6%       |
| ■ neutral           | 18%                 | 21%        | 15%      |
| ■ rather pleasant   | 3%                  | 6%         | 2%       |
| ■ very pleasant     | 0%                  | 0%         | 0%       |
| ▨ NA                | 62%                 | 53%        | 74%      |

1  
2  
3  
4  
5  
6  
7  
8  
9  
10  
11  
12  
13  
14  
15  
16  
17  
18  
19  
20  
21  
22  
23  
24  
25  
26  
27  
28  
29  
30  
31

**Which factors did you consider in your decision against disclosure?**



**Supplement A***Translated Questionnaire (not formatted)***1) Discipline:**

[open format]

**2) Gender:**

- male
- female

**3) Age:**

[open format]

**4) Do you work in a hospital?**

- yes, university hospital
- yes, non-university hospital
- no

**5) If yes: Which position do you have?**

- head
- senior
- resident

**6) If no: How do you work?**

- licensed
- employed
- other

**7) How much of your working hours (in %) do you spend on patient care?**

[open format]

**8) How much of your working hours (in %) do you spend on research?**

[open format]

**9) Please tick every box that resembles a research area that you have been actively working in in the last five years (multiple responses are possible).**

- non-interventional post-marketing studies
- clinical studies on behalf of pharmaceutical companies
- clinical studies investigated by yourself
- own, academical research
- other: \_\_\_\_\_
- I do not work in research.

**10) What percentage of German physicians do you estimate consented to disclose in the database?**

In 2016 for disclosure 2015: [open format]

In 2017 for disclosure 2016: [open format]

1  
2  
3 **11) Do you know the actual percentage approximately, for example from the media?**  
4

5 2016:

- 6  yes  
7  no  
8

9 2017:

- 10  yes  
11  no  
12  
13

14 **12) Have your information about payments been correctly reported in the database?**  
15 **“Euros for Doctors”?**  
16

17 [groups 1, 3-5] In 2017 for 2016:

- 18  yes  
19  no  
20  I don't know  
21

22  
23 [groups 2-5] In 2016 for 2015:

- 24  yes  
25  no  
26  I don't know  
27  
28

29 **13) In the summer of 2016, first data were disclosed in the database. How much do the**  
30 **following statements apply to you?**

- 31 - I looked into the database.  
32 - I followed media coverage about the database.  
33 - I searched for persons in the database.  
34

35 scale:

- 36  applies not at all  
37  applies less  
38  neutral  
39  applies a bit  
40  applies fully  
41  
42

43 **14) How high is the amount of money you disclosed, compared to the other disclosed**  
44 **payments?**

- 45  definitely below average  
46  somewhat below average  
47  average  
48  somewhat above average  
49  definitely above average  
50  
51  
52  
53  
54  
55  
56  
57  
58  
59  
60

1  
2  
3 **15. 1) [group 1, 3-5] You disclosed data in 2015. We are interested in how your**  
4 **environment reacted to this entry.**

5 **15.2) [group 2] You disclosed data in 2015. We are interested in how your environment**  
6 **reacted to this entry.**

7  
8  
9 **How many reactions did you get from ...**

- 10 - **patients?**
- 11 - **colleagues?**
- 12 - **your private environment?**

13  
14 **scale:**

- 15  none
- 16  very few
- 17  rather few
- 18  rather many
- 19  many

20  
21  
22  
23 **16) If there were reactions, how was their content? Reactions from ...**

- 24 - **patients**
- 25 - **colleagues**
- 26 - **your private environment**

27  
28 **scale:**

- 29  very negative
- 30  somewhat negative
- 31  neutral
- 32  somewhat positive
- 33  very positive

34  
35  
36 **17) If there were reactions, how did you perceive them? Reactions from ...**

- 37 - **patients**
- 38 - **colleagues**
- 39 - **your private environment**

40  
41 **scale:**

- 42  very unpleasant
- 43  rather unpleasant
- 44  neutral
- 45  rather pleasant
- 46  very pleasant

47  
48  
49 **18) Was there anything that bothered you about the reactions?**

50 [open format]

51  
52  
53  
54 **19.1) [group 1] You do not have an entry in the database in the year 2016. Why?**

55 **19.2) [group 2] You do not have an entry in the database in the year 2015. Why?**

- 56  I have not received any payments.
- 57  I was not asked for my consent to disclose.
- 58  I forgot to answer the inquiry for disclosure consent.
- 59  I consciously decided against disclosure.

1  
2  
3  
4 **20.1) [group 1] In case you decided consciously against disclosure: Which factors did**  
5 **you consider in your decision against disclosure?**

- 6  
7 - Others advised me not to disclose.  
8 - Consideration of the public opinion / media reporting.  
9 - Consideration of future reactions by patients.  
10 - Consideration of future reactions by colleagues.  
11 - Consideration of future reactions in the private surrounding.  
12 - Negative experiences with disclosure 2015.

13  
14 scale:

- 15  applies not at all  
16  applies less  
17  neutral  
18  applies a bit  
19  applies fully  
20  
21

22  
23 **20.2) [group 2] In case you decided consciously against disclosure: Which factors did**  
24 **you consider in your decision against disclosure?**

- 25 - Others advised me not to disclose.  
26 - Consideration of the public opinion / media reporting.  
27 - Consideration of future reactions by patients.  
28 - Consideration of future reactions by colleagues.  
29 - Consideration of future reactions in the private surrounding.

30  
31 scale:

- 32  applies not at all  
33  applies less  
34  neutral  
35  applies a bit  
36  applies fully  
37  
38

39  
40 **20.3) [groups 3-5] In 2016, you decided to disclose a second time. Please state how**  
41 **much the following statements apply to you.**

- 42 - [groups 3-5] Coming to decision whether or not to disclose was easier for the second  
43 year than for the first year.  
44 - [groups 4,5] My payments shifted because the opportunities by the pharmaceutical  
45 companies changed.  
46 - [group 4] My payments shifted because I consciously accepted more money.  
47 - [group 5] My payments shifted because I consciously accepted less money.  
48

49 scale:

- 50  applies not at all  
51  applies less  
52  neutral  
53  applies a bit  
54  applies fully  
55  
56  
57  
58  
59  
60

1  
2  
3 **21) To what extent do you agree with the following statements:**

- 4 - Payments by pharmaceutical companies are a risk for the independence of clinical  
5 practice and research.  
6  
7 - Disclosure of payments increases patients' trust in me.  
8  
9 - Receiving payments is fine if regulation measures (disclosure, exclusion from  
10 committees) are adopted.  
11  
12 - In principle, I approve of transparency.  
13  
14 - Disclosure leads to a wrong impression in the public.  
15  
16 - Collaboration with pharmaceutical companies and receiving payments by those  
17 companies is part of the medical profession.  
18  
19 - Some payments should be avoided, while others are indispensable.  
20  
21 - Without good alternatives in research and training, nothing about financial  
22 interactions in the medical sector will change.  
23  
24 - Disclosure of payments should be more nuanced.

25 In case you are working in research:

- 26 - Transparency guidelines impede my scientific work.  
27  
28 - I have been confronted with disclosures within the context of a published study at  
29 least once.  
30  
31 - My research results were criticized because of my disclosures at least once.  
32  
33 - If I do not cooperate with the industry, the research that is relevant for me lacks  
34 financial resources.  
35  
36 - The undifferentiated displaying of the disclosures brings science into disrepute.

37 scale:

- 38  strongly disagree  
39  disagree  
40  neutral  
41  agree  
42  strongly agree

43 **22) In your opinion: Disclosure of financial payments is more important in which  
44 area?**

- 45  definitely in patient care  
46  rather in patient care  
47  equally important  
48  rather in research  
49  definitely in research  
50  
51  
52  
53  
54  
55  
56  
57  
58  
59  
60



## Supplement B

### Sample Characteristics

| Characteristic |                                          | <i>n</i> | %  |
|----------------|------------------------------------------|----------|----|
| Gender         | Female                                   | 48       | 21 |
|                | Male                                     | 185      | 79 |
|                | NA                                       | 1        | 0  |
| Field          | General and internal medicine            | 129      | 55 |
|                | Psychiatry, neurology and psychosomatics | 33       | 14 |
|                | Surgery                                  | 31       | 13 |
|                | Other                                    | 38       | 16 |
| Workplace      | University hospital                      | 67       | 29 |
|                | Non-university hospital                  | 51       | 22 |
|                | <i>Of which position: Head</i>           | 49       | 42 |
|                | <i>Senior</i>                            | 53       | 19 |
|                | <i>Resident</i>                          | 11       | 9  |
|                | NA                                       | 5        | 4  |
|                | Practice                                 | 113      | 48 |
|                | <i>Of which: Licensed</i>                | 104      | 92 |
|                | <i>Employed</i>                          | 9        | 8  |
|                | NA                                       | 3        | 1  |

Note. N= 234

## Supplement C

### *Investigating non-disclosure, regression analysis.*

To answer the first research question, we investigated data of those participants who disclosed in 2015 ( $n = 189$ ) to predict whether they disclosed again in 2016 ( $n = 147$ , 78%) or did not disclose again in 2016 ( $n = 42$ , 22%). Response rate per item differed: For the items attitude, descriptive norm 2015, and pleasantness of reactions 2015, data were available from 188, 174, and 107 participants, respectively. For pleasantness of reactions 2015, we thus only had data of 22 people who did not disclose in 2016. All variables were significantly non-normal: all  $W = 0.52 - 0.92$ , all  $p < .01$ .

In regression model 1, the predictors were the three variables X1: pleasantness of reactions, X2: descriptive norm and X3: attitude. This model did not significantly improve the model fit compared to the null model,  $\chi^2 = 1.0$ ,  $p = .792$ . Regression model 2 included the three variables as well as the interaction terms X3\*X2 as well as X3\*X1. This second model also did not significantly improve the model fit compared to the null model,  $\chi^2 = 12.66$ ,  $p = .027$ . Effect sizes, pseudo- $R^2$ -values and variance inflation factors ( $VIF$ ) of regression model 1 and 2 can be seen in Table C1. The pseudo- $R^2$ -values, being very low, indicate that this prediction model is of poor quality. We further explored the data by investigating whether participants who disclosed in 2016 had systematically different values on the main outcomes from the participants who did not disclose in 2016. Results from the performed Wilcoxon tests provided no indication for systematic differences between the groups (all  $p < .01$ ).

**Table C1***Logistic Regression Coefficients and Effect Sizes of Regression Model 1 and 2*

|                                                        | <i>B (SE)</i> | <i>p</i> | <i>OR</i> |
|--------------------------------------------------------|---------------|----------|-----------|
| Regression model 1: Only main effects                  |               |          |           |
| Intercept                                              | 1.54 (0.28)   | .000     | 4.66      |
| Pleasantness of reactions                              | 0.24 (0.27)   | .373     | 1.27      |
| Descriptive norm                                       | 0.13 (0.37)   | .717     | 1.14      |
| Attitude                                               | -0.10 (0.32)  | .753     | 0.90      |
| Regression model 2: Main effects and interaction terms |               |          |           |
| Intercept                                              | 2.31 (0.60)   | .000     | 10.11     |
| Pleasantness of reactions                              | 0.61 (0.42)   | .142     | 1.84      |
| Descriptive norm                                       | -0.06 (0.46)  | .891     | 0.94      |
| Attitude                                               | -1.57 (1.08)  | .145     | 0.21      |
| Attitude*pleasantness of reactions                     | -1.27 (0.64)  | .048     | 0.28      |
| Attitude*descriptive norm                              | 0.98 (0.67)   | .140     | 2.67      |

*Note.* Model fit regression model 1:  $R^2 = .01$  (Hosmer-Lemeshow), .01 (Cox-Snell), .02 (Nagelkerke); model 1 compared to null model:  $\chi^2(3) = 1.04$ ,  $p = .792$ , all  $VIF < 10$ ; Model fit regression model 2:  $R^2 = .01$  (Hosmer-Lemeshow), .01 (Cox-Snell), .02 (Nagelkerke); model 2 compared to null model:  $\chi^2(5) = 12.66$ ,  $p = .027$ ; model 2 compared to model 1:  $\chi^2(2) = 11.63$ ,  $p = .003$ , all  $VIF < 10$ .

**STROBE 2007 (v4) checklist of items to be included in reports of observational studies in epidemiology\***  
**Checklist for cohort, case-control, and cross-sectional studies (combined)**

| Section/Topic             | Item # | Recommendation                                                                                                                                                                                                                                                                                                                                                                                                                                                         | Reported on page # |
|---------------------------|--------|------------------------------------------------------------------------------------------------------------------------------------------------------------------------------------------------------------------------------------------------------------------------------------------------------------------------------------------------------------------------------------------------------------------------------------------------------------------------|--------------------|
| Title and abstract        | 1      | (a) Indicate the study's design with a commonly used term in the title or the abstract                                                                                                                                                                                                                                                                                                                                                                                 | 1                  |
|                           |        | (b) Provide in the abstract an informative and balanced summary of what was done and what was found                                                                                                                                                                                                                                                                                                                                                                    | 2                  |
| <b>Introduction</b>       |        |                                                                                                                                                                                                                                                                                                                                                                                                                                                                        |                    |
| Background/rationale      | 2      | Explain the scientific background and rationale for the investigation being reported                                                                                                                                                                                                                                                                                                                                                                                   | 4-6                |
| Objectives                | 3      | State specific objectives, including any pre-specified hypotheses                                                                                                                                                                                                                                                                                                                                                                                                      | 7                  |
| <b>Methods</b>            |        |                                                                                                                                                                                                                                                                                                                                                                                                                                                                        |                    |
| Study design              | 4      | Present key elements of study design early in the paper                                                                                                                                                                                                                                                                                                                                                                                                                | 7-8                |
| Setting                   | 5      | Describe the setting, locations, and relevant dates, including periods of recruitment, exposure, follow-up, and data collection                                                                                                                                                                                                                                                                                                                                        | 7-9                |
| Participants              | 6      | (a) <i>Cohort study</i> —Give the eligibility criteria, and the sources and methods of selection of participants. Describe methods of follow-up<br><i>Case-control study</i> —Give the eligibility criteria, and the sources and methods of case ascertainment and control selection. Give the rationale for the choice of cases and controls<br><i>Cross-sectional study</i> —Give the eligibility criteria, and the sources and methods of selection of participants | 7-8                |
|                           |        | (b) <i>Cohort study</i> —For matched studies, give matching criteria and number of exposed and unexposed<br><i>Case-control study</i> —For matched studies, give matching criteria and the number of controls per case                                                                                                                                                                                                                                                 | NA                 |
| Variables                 | 7      | Clearly define all outcomes, exposures, predictors, potential confounders, and effect modifiers. Give diagnostic criteria, if applicable                                                                                                                                                                                                                                                                                                                               | 8-9                |
| Data sources/ measurement | 8*     | For each variable of interest, give sources of data and details of methods of assessment (measurement). Describe comparability of assessment methods if there is more than one group                                                                                                                                                                                                                                                                                   | 8-9, Supplement A  |
| Bias                      | 9      | Describe any efforts to address potential sources of bias                                                                                                                                                                                                                                                                                                                                                                                                              | 8                  |
| Study size                | 10     | Explain how the study size was arrived at                                                                                                                                                                                                                                                                                                                                                                                                                              | 8                  |
| Quantitative variables    | 11     | Explain how quantitative variables were handled in the analyses. If applicable, describe which groupings were chosen and why                                                                                                                                                                                                                                                                                                                                           | 8-10               |
| Statistical methods       | 12     | (a) Describe all statistical methods, including those used to control for confounding                                                                                                                                                                                                                                                                                                                                                                                  | 10                 |
|                           |        | (b) Describe any methods used to examine subgroups and interactions                                                                                                                                                                                                                                                                                                                                                                                                    | NA                 |
|                           |        | (c) Explain how missing data were addressed                                                                                                                                                                                                                                                                                                                                                                                                                            | NA                 |
|                           |        | (d) <i>Cohort study</i> —If applicable, explain how loss to follow-up was addressed<br><i>Case-control study</i> —If applicable, explain how matching of cases and controls was addressed                                                                                                                                                                                                                                                                              | 8                  |

|                          |     |                                                                                                                                                                                                              |                  |
|--------------------------|-----|--------------------------------------------------------------------------------------------------------------------------------------------------------------------------------------------------------------|------------------|
|                          |     | <i>Cross-sectional study</i> —If applicable, describe analytical methods taking account of sampling strategy                                                                                                 |                  |
|                          |     | (e) Describe any sensitivity analyses                                                                                                                                                                        |                  |
| <b>Results</b>           |     |                                                                                                                                                                                                              |                  |
| Participants             | 13* | (a) Report numbers of individuals at each stage of study—eg numbers potentially eligible, examined for eligibility, confirmed eligible, included in the study, completing follow-up, and analysed            | 7, 10            |
|                          |     | (b) Give reasons for non-participation at each stage                                                                                                                                                         | 10               |
|                          |     | (c) Consider use of a flow diagram                                                                                                                                                                           | Figure 1         |
| Descriptive data         | 14* | (a) Give characteristics of study participants (eg demographic, clinical, social) and information on exposures and potential confounders                                                                     | 10, Supplement B |
|                          |     | (b) Indicate number of participants with missing data for each variable of interest                                                                                                                          | 10-14            |
|                          |     | (c) <i>Cohort study</i> —Summarise follow-up time (eg, average and total amount)                                                                                                                             | NA               |
| Outcome data             | 15* | <i>Cohort study</i> —Report numbers of outcome events or summary measures over time                                                                                                                          | NA               |
|                          |     | <i>Case-control study</i> —Report numbers in each exposure category, or summary measures of exposure                                                                                                         | NA               |
|                          |     | <i>Cross-sectional study</i> —Report numbers of outcome events or summary measures                                                                                                                           | 10-11, Figure 2  |
| Main results             | 16  | (a) Give unadjusted estimates and, if applicable, confounder-adjusted estimates and their precision (eg, 95% confidence interval). Make clear which confounders were adjusted for and why they were included | 11-13            |
|                          |     | (b) Report category boundaries when continuous variables were categorized                                                                                                                                    | NA               |
|                          |     | (c) If relevant, consider translating estimates of relative risk into absolute risk for a meaningful time period                                                                                             | NA               |
| Other analyses           | 17  | Report other analyses done—eg analyses of subgroups and interactions, and sensitivity analyses                                                                                                               | 11-15            |
| <b>Discussion</b>        |     |                                                                                                                                                                                                              |                  |
| Key results              | 18  | Summarise key results with reference to study objectives                                                                                                                                                     | 15-16            |
| Limitations              | 19  | Discuss limitations of the study, taking into account sources of potential bias or imprecision. Discuss both direction and magnitude of any potential bias                                                   | 16               |
| Interpretation           | 20  | Give a cautious overall interpretation of results considering objectives, limitations, multiplicity of analyses, results from similar studies, and other relevant evidence                                   | 16               |
| Generalisability         | 21  | Discuss the generalisability (external validity) of the study results                                                                                                                                        | 16-17            |
| <b>Other information</b> |     |                                                                                                                                                                                                              |                  |
| Funding                  | 22  | Give the source of funding and the role of the funders for the present study and, if applicable, for the original study on which the present article is based                                                | 21               |

\*Give information separately for cases and controls in case-control studies and, if applicable, for exposed and unexposed groups in cohort and cross-sectional studies.

**Note:** An Explanation and Elaboration article discusses each checklist item and gives methodological background and published examples of transparent reporting. The STROBE checklist is best used in conjunction with this article (freely available on the Web sites of PLoS Medicine at <http://www.plosmedicine.org/>, Annals of Internal Medicine at <http://www.annals.org/>, and Epidemiology at <http://www.epidem.com/>). Information on the STROBE Initiative is available at [www.strobe-statement.org](http://www.strobe-statement.org).
