# Supplementary material for: Physicians’ attitudes towards disclosure of payments from pharmaceutical companies in a nationwide voluntary transparency database: a cross-sectional survey
Source: PubMed Central journal article supplement — BMJ Open. 2022 Jun 24;12(6):e055963. doi: 10.1136/bmjopen-2021-055963 (PMC9234799; doi:10.1136/bmjopen-2021-055963), 2022-06-24
Supplement: bmjopen-2021-055963supp001.pdf [file bmjopen-2021-055963supp001.pdf]

**Supplement A***Translated Questionnaire (not formatted)***1) Discipline:**

[open format]

**2) Gender:**

- male
- female

**3) Age:**

[open format]

**4) Do you work in a hospital?**

- yes, university hospital
- yes, non-university hospital
- no

**5) If yes: Which position do you have?**

- head
- senior
- resident

**6) If no: How do you work?**

- licensed
- employed
- other

**7) How much of your working hours (in %) do you spend on patient care?**

[open format]

**8) How much of your working hours (in %) do you spend on research?**

[open format]

**9) Please tick every box that resembles a research area that you have been actively working in in the last five years (multiple responses are possible).**

- non-interventional post-marketing studies
- clinical studies on behalf of pharmaceutical companies
- clinical studies investigated by yourself
- own, academical research
- other: \_\_\_\_\_
- I do not work in research.

**10) What percentage of German physicians do you estimate consented to disclose in the database?**

In 2016 for disclosure 2015: [open format]

In 2017 for disclosure 2016: [open format]

**11) Do you know the actual percentage approximately, for example from the media?**

2016:

- yes
- no

2017:

- yes
- no

**12) Have your information about payments been correctly reported in the database? “Euros for Doctors”?**

[groups 1, 3-5] In 2017 for 2016:

- yes
- no
- I don't know

[groups 2-5] In 2016 for 2015:

- yes
- no
- I don't know

**13) In the summer of 2016, first data were disclosed in the database. How much do the following statements apply to you?**

- I looked into the database.
- I followed media coverage about the database.
- I searched for persons in the database.

scale:

- applies not at all
- applies less
- neutral
- applies a bit
- applies fully

**14) How high is the amount of money you disclosed, compared to the other disclosed payments?**

- definitely below average
- somewhat below average
- average
- somewhat above average
- definitely above average

**15. 1) [group 1, 3-5] You disclosed data in 2015. We are interested in how your environment reacted to this entry.**

**15.2) [group 2] You disclosed data in 2015. We are interested in how your environment reacted to this entry.**

**How many reactions did you get from ...**

- **patients?**
- **colleagues?**
- **your private environment?**

scale:

- none
- very few
- rather few
- rather many
- many

**16) If there were reactions, how was their content? Reactions from ...**

- **patients**
- **colleagues**
- **your private environment**

scale:

- very negative
- somewhat negative
- neutral
- somewhat positive
- very positive

**17) If there were reactions, how did you perceive them? Reactions from ...**

- **patients**
- **colleagues**
- **your private environment**

scale:

- very unpleasant
- rather unpleasant
- neutral
- rather pleasant
- very pleasant

**18) Was there anything that bothered you about the reactions?**

[open format]

**19.1) [group 1] You do not have an entry in the database in the year 2016. Why?**

**19.2) [group 2] You do not have an entry in the database in the year 2015. Why?**

- I have not received any payments.
- I was not asked for my consent to disclose.
- I forgot to answer the inquiry for disclosure consent.
- I consciously decided against disclosure.

**20.1) [group 1] In case you decided consciously against disclosure: Which factors did you consider in your decision against disclosure?**

- Others advised me not to disclose.
- Consideration of the public opinion / media reporting.
- Consideration of future reactions by patients.
- Consideration of future reactions by colleagues.
- Consideration of future reactions in the private surrounding.
- Negative experiences with disclosure 2015.

scale:

- applies not at all
- applies less
- neutral
- applies a bit
- applies fully

**20.2) [group 2] In case you decided consciously against disclosure: Which factors did you consider in your decision against disclosure?**

- Others advised me not to disclose.
- Consideration of the public opinion / media reporting.
- Consideration of future reactions by patients.
- Consideration of future reactions by colleagues.
- Consideration of future reactions in the private surrounding.

scale:

- applies not at all
- applies less
- neutral
- applies a bit
- applies fully

**20.3) [groups 3-5] In 2016, you decided to disclose a second time. Please state how much the following statements apply to you.**

- [groups 3-5] Coming to decision whether or not to disclose was easier for the second year than for the first year.
- [groups 4,5] My payments shifted because the opportunities by the pharmaceutical companies changed.
- [group 4] My payments shifted because I consciously accepted more money.
- [group 5] My payments shifted because I consciously accepted less money.

scale:

- applies not at all
- applies less
- neutral
- applies a bit
- applies fully

**21) To what extent do you agree with the following statements:**

- Payments by pharmaceutical companies are a risk for the independence of clinical practice and research.
- Disclosure of payments increases patients' trust in me.
- Receiving payments is fine if regulation measures (disclosure, exclusion from committees) are adopted.
- In principle, I approve of transparency.
- Disclosure leads to a wrong impression in the public.
- Collaboration with pharmaceutical companies and receiving payments by those companies is part of the medical profession.
- Some payments should be avoided, while others are indispensable.
- Without good alternatives in research and training, nothing about financial interactions in the medical sector will change.
- Disclosure of payments should be more nuanced.

In case you are working in research:

- Transparency guidelines impede my scientific work.
- I have been confronted with disclosures within the context of a published study at least once.
- My research results were criticized because of my disclosures at least once.
- If I do not cooperate with the industry, the research that is relevant for me lacks financial resources.
- The undifferentiated displaying of the disclosures brings science into disrepute.

scale:

- strongly disagree
- disagree
- neutral
- agree
- strongly agree

**22) In your opinion: Disclosure of financial payments is more important in which area?**

- definitely in patient care
- rather in patient care
- equally important
- rather in research
- definitely in research
