# Supplementary material for: Physicians’ attitudes towards disclosure of payments from pharmaceutical companies in a nationwide voluntary transparency database: a cross-sectional survey
Source: PubMed Central journal article supplement — BMJ Open. 2022 Jun 24;12(6):e055963. doi: 10.1136/bmjopen-2021-055963 (PMC9234799; doi:10.1136/bmjopen-2021-055963), 2022-06-24
Supplement: bmjopen-2021-055963supp002.pdf [file bmjopen-2021-055963supp002.pdf]

**Supplement B***Sample Characteristics*

| Characteristic |                                          | <i>n</i> | %  |
|----------------|------------------------------------------|----------|----|
| Gender         | Female                                   | 48       | 21 |
|                | Male                                     | 185      | 79 |
|                | NA                                       | 1        | 0  |
| Field          | General and internal medicine            | 129      | 55 |
|                | Psychiatry, neurology and psychosomatics | 33       | 14 |
|                | Surgery                                  | 31       | 13 |
|                | Other                                    | 38       | 16 |
| Workplace      | University hospital                      | 67       | 29 |
|                | Non-university hospital                  | 51       | 22 |
|                | <i>Of which position: Head</i>           | 49       | 42 |
|                | <i>Senior</i>                            | 53       | 19 |
|                | <i>Resident</i>                          | 11       | 9  |
|                | <i>NA</i>                                | 5        | 4  |
|                | Practice                                 | 113      | 48 |
|                | <i>Of which: Licensed</i>                | 104      | 92 |
|                | <i>Employed</i>                          | 9        | 8  |
|                | NA                                       | 3        | 1  |

*Note. N= 234*
